# Supplementary material for: Ruthenium(ii)-catalyzed C–H activation/C–N bond formation via in situ generated iminophosphorane as the directing group: construction of annulated pyridin-2(1H)-ones
Source: Royal Society of Chemistry journal article supplement (doi:10.1039/c4ra10105g), 2014-10-29
Supplement: c4ra10105g1.pdf [file c4ra10105g1.pdf]

## Supporting Information

### **Ruthenium(II)-Catalyzed C–H Activation/C–N Bond Formation via in situ Generated Iminophosphorane as the Directing Group: Construction of Annulated Pyridin-2(1*H*)-ones**

Rajesh K. Arigela, Ravi Kumar, Trapti Joshi, Rohit Mahar, and Bijoy Kundu\*

Medicinal & Process Chemistry Division, CSIR-Central Drug Research Institute, B.S. 10/1, Sector 10, Jankipuram Extension, Sitapur Road, Lucknow, 226031 (India). Academy of Scientific and Innovative Research, New Delhi, 110001, India. Sophisticated Analytical Instrumental Facility, CSIR-Central Drug Research Institute, Lucknow, 226031 (India).

\*Corresponding author. Tel.: +91 522 2612411-18; fax: +91 522 2623405;

e-mail: [bijoy\\_kundu@yahoo.com](mailto:bijoy_kundu@yahoo.com), [b\\_kundu@cdri.res.in](mailto:b_kundu@cdri.res.in)

### Table of Contents

|                                                                                                          |            |
|----------------------------------------------------------------------------------------------------------|------------|
| <b>I. Mechanistic observation reactions</b>                                                              | <b>P2</b>  |
| <b>II. <sup>1</sup>H and <sup>31</sup>P NMR Experiments</b>                                              | <b>P5</b>  |
| <b>III. General Information and methods</b>                                                              | <b>P8</b>  |
| <b>IV. General Procedure for the Preparation of Aryl acyl azide (1a-1n)</b>                              | <b>P9</b>  |
| <b>V. General procedure for the ruthenium-catalyzed synthesis of<br/>of isoquinolone derivatives (4)</b> | <b>P12</b> |
| <b>VI. Chareterization of Intermediates and Final compounds</b>                                          | <b>P13</b> |
| <b>VII. Copies of mass, <sup>1</sup>H, <sup>13</sup>C and <sup>31</sup>P NMR spectra</b>                 | <b>P23</b> |
| <b>VIII. Copies of 2D NMR spectra</b>                                                                    | <b>P62</b> |

## Experimental Section

### I. Mechanistic observation reactions

#### A Isolation of intermediates iminophosphorane and benzamide during the transformation of **1a** in MeOH

**Scheme 1.** Quenching the reaction after 5h

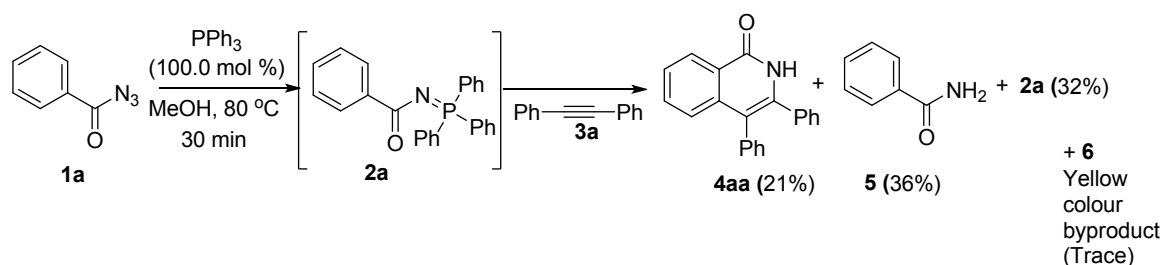

<sup>a</sup> Reaction condition: (1.02 mmol) of **1a**, (0.81 mmol) of **3a**, 3.0 mol %  $[\text{Ru}(p\text{-cymene})\text{Cl}_2]_2$ , (1.02 mmol) of  $\text{Cu}(\text{OAc})_2 \cdot \text{H}_2\text{O}$  in 5 mL of MeOH at 80 °C after 5h.

In a flame dried round bottomed flask equipped with a stir bar, we added a mixture of Acyl azide **1a** (1.02 mmol) (150 mg), in 5.0 mL solvent followed by the addition of Triphenylphosphine (TPP) (1.02 mmol) (267 mg), we then monitored the formation of iminophosphorane **2a** by tlc after 30 min of stirring at 80 °C. Next we added alkyne **3a** (0.816 mmol) (145 mg),  $[\text{RuCl}_2(p\text{-cymene})]_2$  (3.0 mol%) and  $\text{Cu}(\text{OAc})_2 \cdot \text{H}_2\text{O}$  (1.02 mmol) (204 mg). After 5 h of reaction monitored by tlc. The resulting mixture was evaporated to remove MeOH. After that diluted with  $\text{H}_2\text{O}$  (10 mL) and mixture was extracted with EtOAc (3x20 mL). The combined organic layers were washed with brine (20 mL) and dried over  $\text{Na}_2\text{SO}_4$ . The solvent was evaporated in vacuo and the remaining residue was purified by column chromatography on silica gel (*n*-hexanes/EtOAc 5%-60%) to yield products **4aa** (21%, 63 mg), benzamide **5a** (36%, 44 mg), unreacted iminophosphorane **2a** (32%, 124 mg) along with traces of yellow colour byproduct **6**.

#### B. Treatment of presynthesized iminophosphorane **2a** with unactivated internal alkyne **3a** in MeOH

**Scheme 2:** Treatment of presynthesized iminophosphorane **2a** with unactivated internal alkyne **3a** in MeOH for 10 h

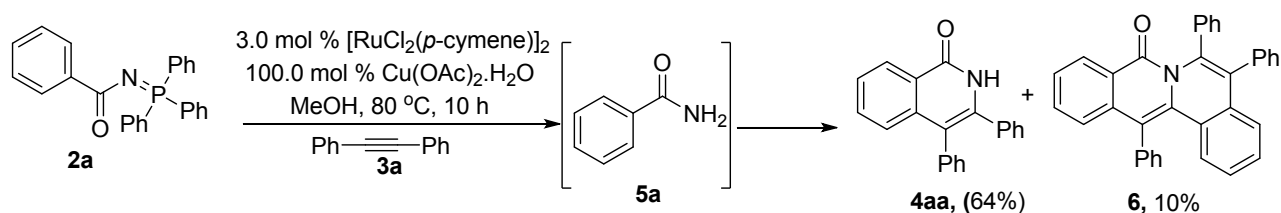

In a flame dried round bottomed flask equipped with a stir bar, we added a mixture of iminophosphorane **2a** (0.39 mmol) (150 mg), in 5.0 mL solvent followed by the addition of alkyne **3** (0.312 mmol),  $[\text{RuCl}_2(p\text{-cymene})]_2$  (3.0 mol%) and  $\text{Cu}(\text{OAc})_2 \cdot \text{H}_2\text{O}$  (0.39 mmol) (71 mg) at 80 °C. After completion of the reaction in 10 h, monitored by tlc, the resulting mixture was evaporated to remove MeOH. After that diluted with  $\text{H}_2\text{O}$  (10 mL) and mixture was extracted with EtOAc (3x20 mL). The combined organic layers were washed with brine (20 mL) and dried over  $\text{Na}_2\text{SO}_4$ . The solvent was evaporated in vacuo and the remaining residue was purified by column chromatography on silica gel (*n*-hexanes/EtOAc 5%-40%) to yield products **4aa** (64%, 74 mg) and **6** (10%, 18 mg).

### C. Treatment of presynthesized iminophosphorane **2a** with unactivated internal alkyne **3a** in DCE

**Scheme 3.** Synthesis of **4aa** from iminophosphorane **2a** in DCE solvent

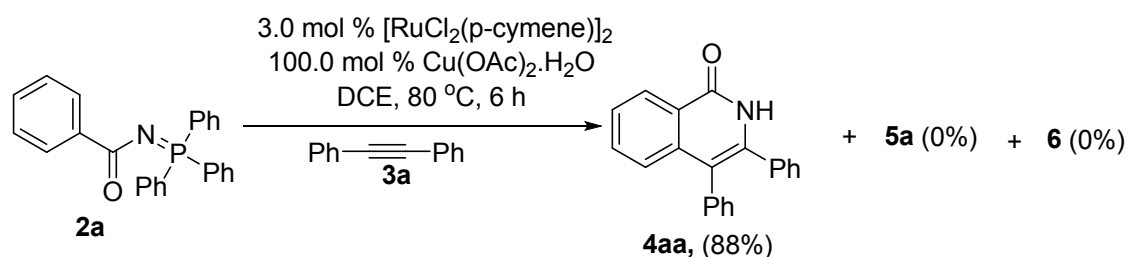

In an flame dried round bottomed flask equipped with a stir bar, we added a mixture of iminophosphorane **2a** (0.39 mmol) (150 mg), in 5.0 mL solvent followed by the addition of alkyne **3a** (0.312 mmol) (56 mg),  $[\text{RuCl}_2(p\text{-cymene})]_2$  (3.0 mol %) and  $\text{Cu}(\text{OAc})_2 \cdot \text{H}_2\text{O}$  (0.39 mmol) (71 mg) at 80 °C. After completion of the reaction in 6 h, monitored by tlc, the resulting mixture was evaporated to remove DCE. After that diluted with  $\text{H}_2\text{O}$  (10 mL) and mixture was extracted with EtOAc (3x20 mL). The combined organic layers were washed

with brine (20 mL) and dried over Na<sub>2</sub>SO<sub>4</sub>. The solvent was evaporated in vacuo and the remaining residue was purified by column chromatography on silica gel (*n*-hexanes/EtOAc 30-40%) to yield product **4aa** (88%, 102 mg).

#### D. Treatment of presynthesized benzamide **5** with unactivated internal alkyne **3a** in MeOH

MeOH

**Scheme 4.** Synthesis of **4aa** from benzamide **5** in MeOH solvent

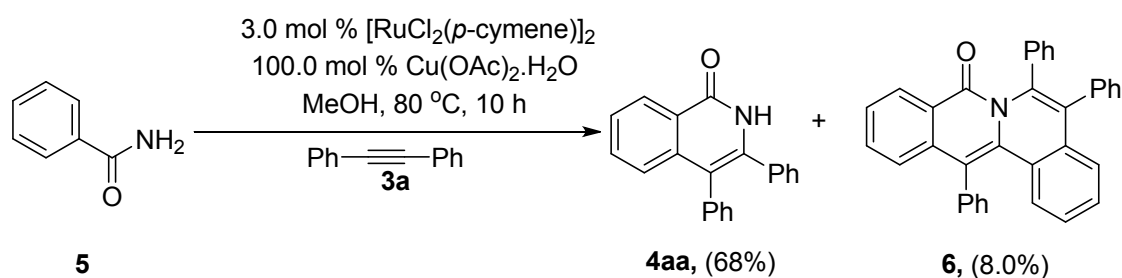

In a flame dried round bottomed flask equipped with a stir bar, we added a mixture of benzamide **5** (1.23 mmol) (150 mg), in 5.0 mL solvent followed by the addition of alkyne **3a** (0.99 mmol) (176 mg), [RuCl<sub>2</sub>(*p*-cymene)]<sub>2</sub> (3.0 mol%) and Cu(OAc)<sub>2</sub>·H<sub>2</sub>O (1.23 mmol) (223 mg). After completion of the reaction in 10 h, monitored by tlc, the resulting mixture was evaporated to remove MeOH. After that diluted with H<sub>2</sub>O (10 mL) and mixture was extracted with EtOAc (3x20 mL). The combined organic layers were washed with brine (20 mL) and dried over Na<sub>2</sub>SO<sub>4</sub>. The solvent was evaporated in vacuo and the remaining residue was purified by column chromatography on silica gel (*n*-hexanes/EtOAc 5% - 40%) to yield products **4aa** (68%, 249 mg) and **6** (8.0%, 46 mg).

#### E. Treatment of presynthesized benzamide with unactivated internal alkyne **3a** in DCE

**Scheme 5.** Synthesis of **4aa** from benzamide **5** in DCE solvent

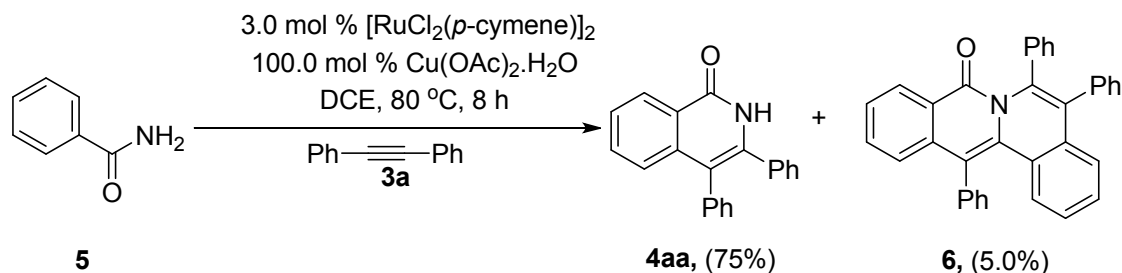

In a flame dried round bottomed flask equipped with a stir bar, we added a mixture of benzamide **5** (1.23 mmol) (150 mg), in 5.0 mL solvent followed by the addition of alkyne **3a**

(0.99 mmol) (176 mg),  $[\text{RuCl}_2(p\text{-cymene})]_2$  (3.0 mol%) and  $\text{Cu}(\text{OAc})_2 \cdot \text{H}_2\text{O}$  (1.23 mmol) (223 mg). After completion of the reaction in 8 h, monitored by tlc, the resulting mixture was evaporated to remove DCE. After that diluted with  $\text{H}_2\text{O}$  (10 mL) and mixture was extracted with EtOAc (3x20 mL). The combined organic layers were washed with brine (20 mL) and dried over  $\text{Na}_2\text{SO}_4$ . The solvent was evaporated in vacuo and the remaining residue was purified by column chromatography on silica gel (*n*-hexanes/EtOAc 5% - 40%) to yield products **4aa** (75%, 276 mg) and **6** (5.0%, 29 mg).

**Scheme 6. Literature reports dealing with transformation of primary benzamide **5a** to undesired products **6** and **7**<sup>1</sup>**

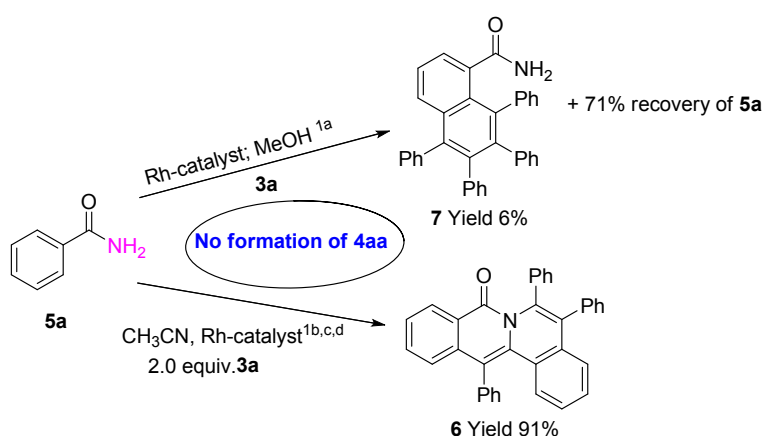

Literature reports on the transformation of primary benzamide **5** to undesired products **6** and **7** with no formation of **4aa**

Formation of **4aa** from **5a** as depicted in (Scheme 6) was in contrast to literature reports<sup>1</sup> where pre-synthesized **5a** in general has been demonstrated to be resistant towards oxidative annulation affording either **7** or a tricyclic compound **6** as the major product (Scheme 6). Notably, Jaganmohan et al<sup>2</sup> have demonstrated formation of quinlinones from benzonitrile via benzamide with no detectable formation of either **6** or **7**.

## II. <sup>1</sup>H and <sup>31</sup>P NMR Experiments

Experimental evidence for the role and stability of the in situ generated iminophosphoranes during the transformation of **1a** in DCE and to rule out involvement of in situ benzamide was established by <sup>1</sup>H and <sup>31</sup>P experiments. Initially **1a** was allowed to react with **3d** in DCE for 2 h at 80 °C in the presence of (1.0 equiv)  $\text{PPh}_3$ , (3.0 mol %) of  $[\text{Ru}(p\text{-cymene})\text{Cl}_2]_2$ , (1.0 equiv)  $\text{Cu}(\text{OAc})_2 \cdot \text{H}_2\text{O}$  and the reaction mixture after passing through a small celite bed was

evaporated to complete dryness. The  $^1\text{H}$  NMR of the crude product was recorded in  $\text{CDCl}_3$  and compared with presynthesized purified iminophosphorane **2a** and **4ad** (Figure 2)

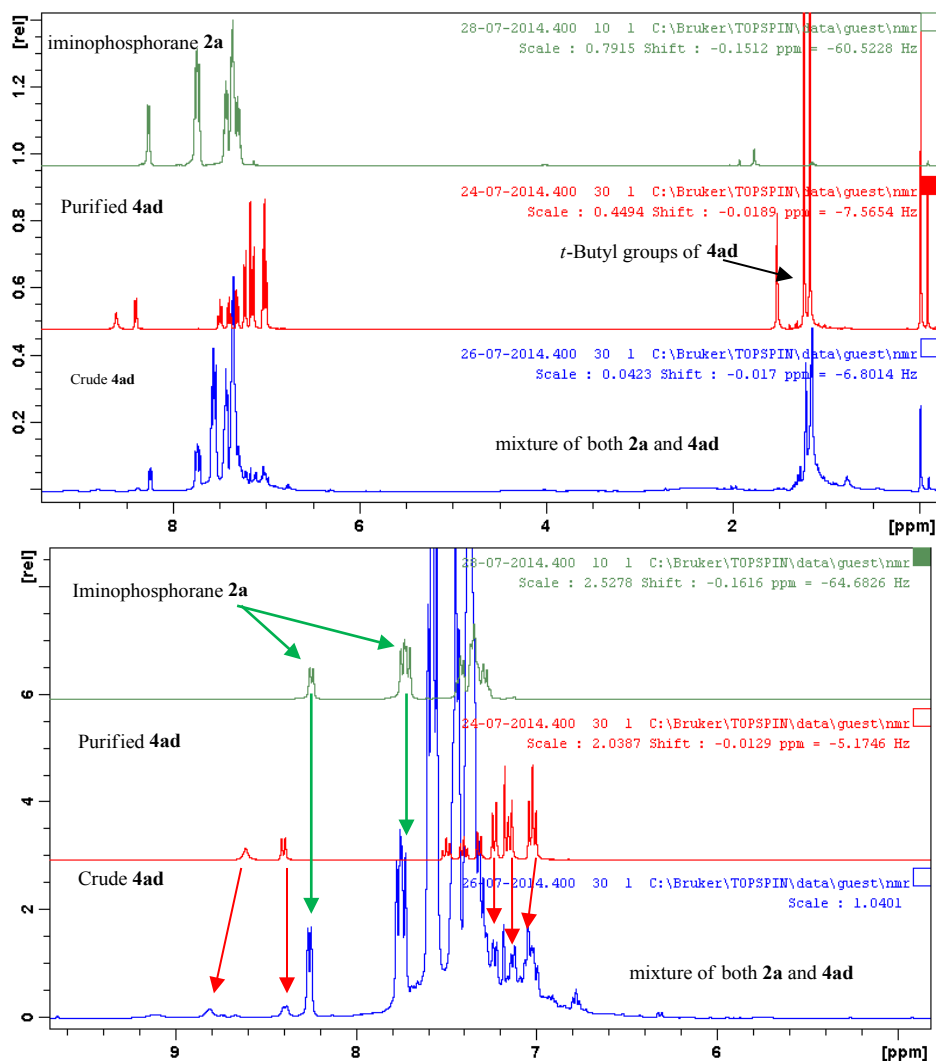

Fig 2: Comparative  $^1\text{H}$  spectra of purified **2a** and **4ad** with crude **4ad**

As is evident, NMR peaks corresponding to the iminophosphorane **2a** and **4ad** can be seen in the crude **4ad**.

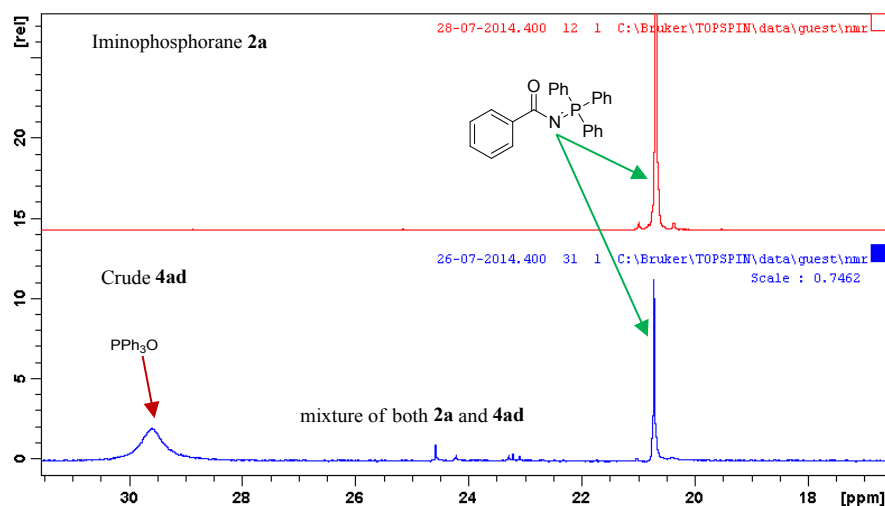

Fig 3:  $^{31}\text{P}$  NMR comparison of **2a** with crude product **4ad**

Next, the  $^{31}\text{P}$  NMR was recorded for the crude reaction mixture and presynthesized iminophosphorane **2a** in  $\text{CDCl}_3$  and a comparative profile has been depicted in Figure 3. As is evident, a peak corresponding to the P present in **2a** at 20.0 ppm can be seen in the crude **4ad** at 20.68 ppm along with formation of triphenyl phosphine oxide ( $\text{PPh}_3\text{O}$ ) as a byproduct at 29.5 ppm. The mass spectrum of the crude reaction mixture also showed the presence of iminophosphorane **2a** corresponding to 382 Da, **4ad** corresponding to 410 Da and  $\text{PPh}_3\text{O}$  corresponding to 279 Da (for mass spectrum see below). The findings suggest that in DCE transformation of **1a** to **4ad** proceeds via in situ formation of iminophosphorane **2a**.

Next in order to check the stability of the N-P bond of **2a**, it was exposed alone (in the absence of **3d**) to  $[\text{Ru}(p\text{-cymene})\text{Cl}_2]_2$  1.0 equiv for 36 h at 80  $^\circ\text{C}$  in DCE.<sup>16</sup> After this, the reaction mixture was evaporated to dryness and both  $^1\text{H}$  and  $^{31}\text{P}$  NMR of the crude reaction mixture was recorded in  $\text{C}_6\text{D}_6$  solvent and a comparative profile has been depicted in Figure 4.

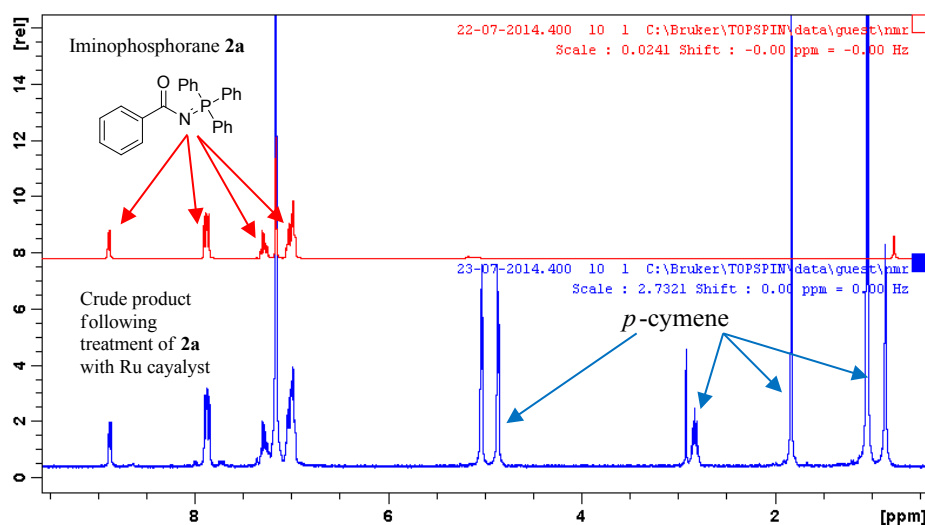

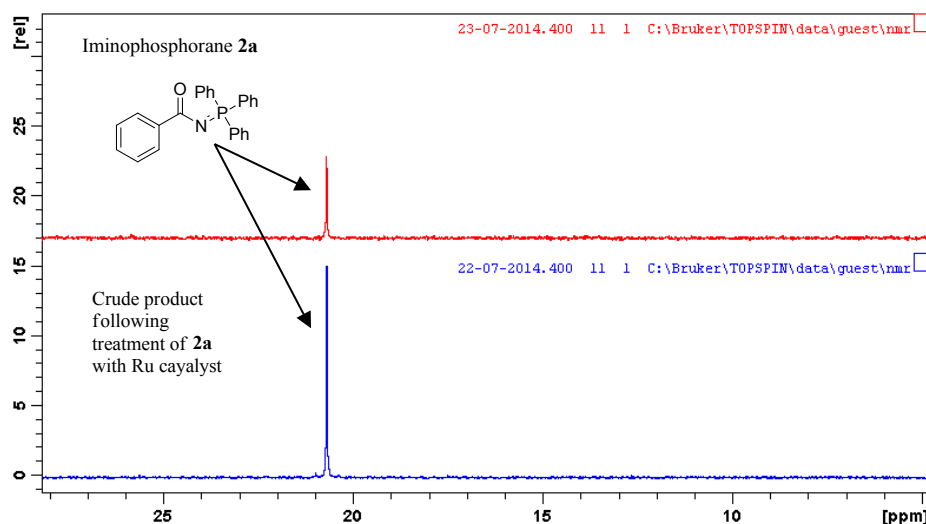

**Fig 4:** Comparative <sup>1</sup>H NMR and <sup>31</sup>P NMR for the stability profile of **2a** with the crude product obtained following treatment of **2a** with Ru-catalyst

As is evident, in situ formation of benzamide **5** was not observed instead <sup>1</sup>H and <sup>31</sup>P signals can be seen due to the unchanged iminophosphorane **2a** even after 36 h of prolonged heating. The findings yet again rule out involvement of in situ benzamide and confirm involvement of the in situ generated iminophosphorane **2a** as the exclusive intermediate during the transformation of **1a** to **4ad** in DCE.

**III General Information and methods.** All reagents and solvents were purchased from commercial sources and used without purification. NMR spectra were recorded with a 300, 400 MHz spectrometers for <sup>1</sup>H NMR, 75, 100 MHz for <sup>13</sup>C NMR, and 161.9 MHz for <sup>31</sup>P NMR. Chemical shifts  $\delta$  are given in ppm relative to the residual signals of tetramethylsilane in CDCl<sub>3</sub> or deuterated solvent CDCl<sub>3</sub>/DMSO-*d*<sub>6</sub> and C<sub>6</sub>D<sub>6</sub> for <sup>1</sup>H and <sup>13</sup>C NMR. Multiplicities are reported as follows: singlet (s), doublet (d), doublet of doublets (dd), doublet of triplets (dt), triplet (t), quartet (q), multiplet (m), broad singlet (bs). HRMS were obtained using the electro spray ionization (ESI) technique and a time-of-flight (TOF) analyzer. Column chromatography was performed using silica gel (100-200 mesh) as the stationary phase. All reactions were monitored by thin layer chromatography (TLC). The purity and characterization of these compounds were further established using HR/ESI Mass

spectroscopy. Melting points were measured on a capillary melting point apparatus and are uncorrected.

#### IV: General Procedure for the Preparation of Aryl acyl azide (**1a-1n**)

Starting materials **1a-n** were prepared according to the literature<sup>34</sup> procedure (the yields were not optimised). To a solution of acyl chloride (20 mmol) in acetone (20 mL) at 0 °C added drop wise solution of sodium azide (1.99 g, 30 mmol) in water (10 mL) (over 1 h). The reaction mixture was warmed to room temperature and stirred for 8-12 h. Acetone was removed under reduced pressure and the reaction mixture was extracted with EtOAc (30 mL x 3). The combined organic layers were dried over Na<sub>2</sub>SO<sub>4</sub> and solvent was evaporated in vacuo. The residue was purified using silica gel column chromatography (*n*-hexanes/EtOAc 9:1ratio).

Compounds **1a**<sup>3a</sup>, **1b**<sup>3a</sup>, **1f**<sup>3a</sup>, **1h**<sup>3a</sup>, **1j**<sup>3a</sup>, **1k**<sup>4</sup> are reported and their corresponding data matches well with corresponding literature data.

#### V. General procedure for the ruthenium-catalyzed synthesis of isoquinolone derivatives (4):

In a flame dried round bottomed flask equipped with a stir bar, we added a mixture of acyl azide **1** (1.02 mmol), in 5.0 mL solvent followed by the addition of Triphenylphosphine (TPP) (1.02 mmol), we then monitored the formation of iminophosphorane by tlc after 30 min of stirring at 80 °C. Next we added alkyne **3** (0.81 mmol), [RuCl<sub>2</sub>(*p*-cymene)]<sub>2</sub> (3.0 mol%) and Cu(OAc)<sub>2</sub>·H<sub>2</sub>O (1.02 mmol). After completion of reaction monitored by tlc, the resulting mixture was diluted with EtOAc, filtered through a pad of celite, and the solvent

was evaporated. At ambient temperature, H<sub>2</sub>O (20 mL) was added and the reaction mixture was extracted with EtOAc (3-20 mL). The combined organic layers were washed with brine (20 mL) and dried over Na<sub>2</sub>SO<sub>4</sub>. The solvent was evaporated in vacuo and the remaining residue was purified by column chromatography on silica gel (*n*-hexanes/EtOAc 3:2 to 4:1) to yield product **4**.

Compounds **4aa**, **4ae**, **4af**, **4ah**, **4ag**, **4ba**, **4fa**, **4ga**, **4ha**, **4ja**, **4ka** and **6** were reported.

**azido(3,4-dimethylphenyl)methanone.(1c)**

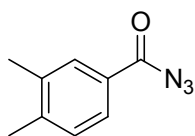

White solid; *R<sub>f</sub>* = 0.56 (10% ethyl acetate/hexane); mp: 48-50 °C; FT-IR (KBr) 3415, 3019, 1669, 1384, 1215 cm<sup>-1</sup>; <sup>1</sup>H NMR (400 MHz, CDCl<sub>3</sub>): δ 7.81 (s, 1H), 7.78-7.76 (m, 1H), 7.22 (d, *J* = 7.9 Hz, 1H), 2.34 (s, 3H), 2.32 (s, 3H) ppm; <sup>13</sup>C NMR (100 MHz, CDCl<sub>3</sub>): δ 172.5, 144.1, 137.1, 130.4, 129.9, 128.3, 127.1, 20.1, 19.6 ppm; HRMS (ESI) calcd for C<sub>9</sub>H<sub>10</sub>N<sub>3</sub>O [M + H] 176.0824 found 176.0824.

**azido(3,4,5-trimethoxyphenyl)methanone.(1d)**

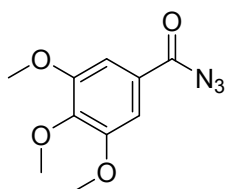

White solid; *R<sub>f</sub>* = 0.48 (10% ethyl acetate/hexane); mp: 73-75 °C; FT-IR (KBr) 3406, 3020, 1667, 1466, 1384 cm<sup>-1</sup>; <sup>1</sup>H NMR (400 MHz, CDCl<sub>3</sub>): δ 7.29 (s, 2H), 3.91 (s, 9H) ppm; <sup>13</sup>C NMR (100 MHz, CDCl<sub>3</sub>): δ 171.8, 153.0, 143.6, 125.5, 106.7, 60.9, 56.3 ppm; HRMS (ESI) calcd for C<sub>10</sub>H<sub>12</sub>N<sub>3</sub>O<sub>4</sub> [M + H] 238.0828 found 238.0836.

**azido(4-fluorophenyl)methanone.(1e)**

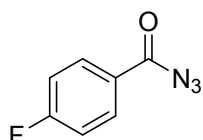

Colorless oil; *R<sub>f</sub>* = 0.56 (10% ethyl acetate/hexane); FT-IR (Neat) 3414, 2181, 1689, 1409, 1216 cm<sup>-1</sup>; <sup>1</sup>H NMR (400 MHz, CDCl<sub>3</sub>): δ 8.09-8.05 (m, 2H), 7.16-7.12 (m, 2H) ppm; <sup>13</sup>C NMR (100 MHz, CDCl<sub>3</sub>): δ 171.3, 167.9, 165.4, 132.1 (d, *J*

= 10 Hz), 115.9 (d,  $J$  = 22 Hz) ppm; HRMS (ESI) calcd for  $C_7H_5N_3OF$  [ $M + H$ ] 166.0417 found 166.0417.

**azido(4-chlorophenyl)methanone.(1f)**

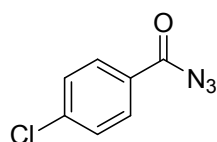

Yellow oil;  $R_f$  = 0.58 (10% ethyl acetate/hexane); FT-IR (Neat) 3410, 2401, 1691, 1421, 1280  $cm^{-1}$ ;  $^1H$  NMR (400 MHz,  $CDCl_3$ ):  $\delta$  7.66 (d,  $J$  = 1.4 Hz, 1H), 7.61-7.59 (m, 1H), 7.20 (d,  $J$  = 7.9 Hz, 1H), 4.86 (s, 2H) ppm;  $^{13}C$  NMR (100 MHz,  $CDCl_3$ ):  $\delta$  171.3, 134.9, 134.2, 132.3, 129.9, 129.4, 127.5 ppm; HRMS (ESI) calcd for  $C_7H_5N_3OCl$  [ $M + H$ ] 182.0121 found 182.0124.

**azido(4-bromophenyl)methanone.(1g)**

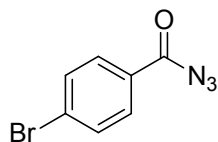

White solid;  $R_f$  = 0.56 (10% ethyl acetate/hexane); mp: 58-60 °C; FT-IR (KBr) 3408, 2136, 1686, 1392, 1216  $cm^{-1}$ ;  $^1H$  NMR (400 MHz,  $CDCl_3$ ):  $\delta$  7.90 (d,  $J$  = 8.7 Hz, 2H), 7.62 (d,  $J$  = 8.7 Hz, 2H) ppm;  $^{13}C$  NMR (100 MHz,  $CDCl_3$ ):  $\delta$  171.6, 132.0, 130.8, 129.7, 129.5 ppm; HRMS (ESI) calcd for  $C_7H_5N_3OBr$  [ $M + H$ ] 225.9616 found 225.9619.

**azido(1-methyl-1H-indol-2-yl)methanone.(1l)**

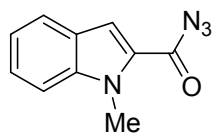

White solid;  $R_f$  = 0.62 (10% ethyl acetate/hexane); mp: 62-64 °C; FT-IR (KBr) 3408, 2401, 1677, 1397, 1214  $cm^{-1}$ ;  $^1H$  NMR (400 MHz,  $CDCl_3$ ):  $\delta$  7.64 (d,  $J$  = 8.0 Hz, 1H), 7.36-7.31 (m, 3H), 7.15-7.11 (m, 1H), 4.02 (s, 3H) ppm;  $^{13}C$  NMR (100 MHz,  $CDCl_3$ ):  $\delta$  166.4, 140.9, 126.3, 125.8, 123.2, 121.1, 112.7, 110.4, 31.7 ppm; HRMS (ESI) calcd for  $C_{10}H_9N_4O$  [ $M + H$ ] 201.0776 found 201.0785.

**azido(1-benzyl-1H-indol-2-yl)methanone.(1m)**

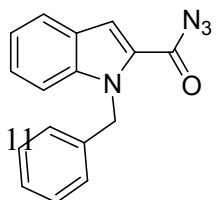

White solid;  $R_f$  = 0.58 (10% ethyl acetate/hexane); mp: 68-70 °C; FT-IR (KBr) 3415, 2412, 1682, 1214  $\text{cm}^{-1}$ ;  $^1\text{H}$  NMR (400 MHz,  $\text{CDCl}_3$ ):  $\delta$  7.75 (d,  $J$  = 8.1 Hz, 1H), 7.49 (s, 1H), 7.40-7.39 (m, 2H), 7.31-7.27 (m, 3H), 7.25-7.19 (m, 1H), 7.10-7.08 (m, 2H), 5.88 (s, 2H) ppm;  $^{13}\text{C}$  NMR (100 MHz,  $\text{CDCl}_3$ ):  $\delta$  166.3, 140.9, 137.9, 128.8, 128.7, 127.4, 126.7, 126.4, 123.3, 121.4, 113.7, 111.0, 48.0 ppm; HRMS (ESI) calcd for  $\text{C}_{16}\text{H}_{13}\text{N}_4\text{O}$  [ $\text{M} + \text{H}$ ] 277.1089 found 277.1089.

**azido(1-methyl-1*H*-indol-3-yl)methanone.(1n)**

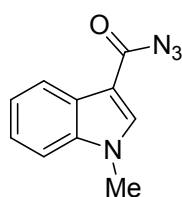

White solid;  $R_f$  = 0.58 (10% ethyl acetate/hexane); mp: 84-86 °C; FT-IR (KBr) 3408, 1677, 1214  $\text{cm}^{-1}$ ;  $^1\text{H}$  NMR (400 MHz,  $\text{CDCl}_3$ ):  $\delta$  8.28-8.26 (m, 1H), 7.79 (s, 1H), 7.36-7.31 (m, 3H), 3.84 (s, 3H) ppm;  $^{13}\text{C}$  NMR (100 MHz,  $\text{CDCl}_3$ ):  $\delta$  167.6, 137.5, 136.4, 126.3, 123.3, 122.6, 121.5, 109.9, 108.2, 33.4 ppm; HRMS (ESI) calcd for  $\text{C}_{10}\text{H}_9\text{N}_4\text{O}$  [ $\text{M} + \text{H}$ ] 201.0776 found 201.0785.

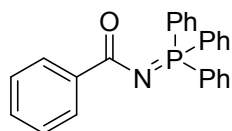

**N-(benzoyl)-triphenyl iminophosphorane (2a)<sup>5</sup>**

White solid,  $R_f$  = 0.5 (40% ethyl acetate/hexane); mp 192-194 °C {Lit<sup>5</sup> Rep 196-198 °C}; FT-IR (KBr) 1026, 1112, 1173, 1342, 1437, 1595, 3016  $\text{cm}^{-1}$ ;  $^1\text{H}$  NMR (400 MHz), 8.41 (d,  $J$  = 8.0 Hz, 2H), 7.91-7.87 (m, 6H), 7.60-7.57 (m, 3H), 7.52-7.42 (m, 9H) ppm;  $^{13}\text{C}$  NMR (100 MHz) 176.3 (d,  $J$  = 6.0 Hz), 138.6 (d,  $J$  = 15.0 Hz), 133.2 (d,  $J_{\text{C-P}}$ , 7.5 Hz), 132.2 (d,  $J_{\text{C-P}}$ , 1.5 Hz), 13.7, 129.6, 128.9, 128.7, 128.6, 127.9, 127.6 ppm;  $^{31}\text{P}$  NMR (161.9 MHz) 20.68 ppm; HRMS (ESI) calcd for  $\text{C}_{25}\text{H}_{20}\text{NOP}$  [ $\text{M} + \text{H}$ ] 382.1361 Found 381.1363.

**Benzamide.(5a)<sup>6</sup>**

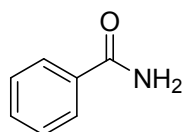

White solid;  $R_f$  = 0.50 (50% ethyl acetate/hexane); mp: 108-110 °C {Lit<sup>6</sup> Rep 126-128 °C}; FT-IR (KBr) 3367, 2253, 1673, 1384, 1216  $\text{cm}^{-1}$ ;  $^1\text{H}$  NMR (400 MHz,  $\text{CDCl}_3$ ):  $\delta$  7.83-7.81 (m, 2H), 7.55-7.51 (m, 1H), 7.46-7.43 (m, 2H), 6.22 (brs,

2H) ppm;  $^{13}\text{C}$  NMR (100 MHz,  $\text{CDCl}_3$ ):  $\delta$  169.8, 133.43, 131.9, 128.6, 127.4 ppm; HRMS (ESI) calcd for  $\text{C}_7\text{H}_8\text{NO}$   $[\text{M} + \text{H}]$  122.0606 found 122.0606.

## VI. Characterisation data of isoquinolin-1(2H)-one (4):

### 3,4-diphenylisoquinolin-1(2H)-one (4aa).<sup>7</sup>

White solid;  $R_f$  = 0.54 (40% ethyl acetate/hexane); Yield; 260 mg (86%); mp: 236-238 °C

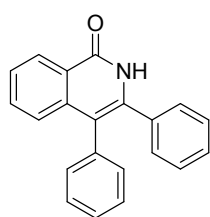

{Lit Rep<sup>7</sup> 242-246 °C }; FT-IR (KBr) 3404, 3018, 1659, 1387, 1215  $\text{cm}^{-1}$ ;

$^1\text{H}$  NMR (400 MHz,  $\text{DMSO}-d_6$ ):  $\delta$  11.54 (s, 1H), 8.33 (dd,  $J_1$  = 7.9 Hz,  $J_2$  = 1.0 Hz, 1H), 7.89-7.87 (m, 1H), 7.67-7.63 (m, 1H), 7.55-7.51 (m, 1H),

7.47-7.43 (m, 1H), 7.31-7.23 (m, 6H), 7.17-7.15 (m, 3H) ppm;  $^{13}\text{C}$  NMR (100 MHz,  $\text{DMSO}-d_6$ ):  $\delta$  169.6, 162.9, 138.8, 137.2, 135.8, 135.1, 132.8, 132.1, 131.9, 129.4, 128.7, 128.7, 128.5, 128.4, 127.6, 127.5, 127.4, 126.7, 125.8, 125.2, 117.4 ppm; HRMS (ESI) calcd for  $\text{C}_{21}\text{H}_{16}\text{NO}$   $[\text{M} + \text{H}]$  298.1232 found 298.1231.

### 3,4-diethylisoquinolin-1(2H)-one (4ae).<sup>7b</sup>

Off-white solid;  $R_f$  = 0.56 (40% ethyl acetate/hexane); Yield; 156 mg (76%); mp: 168-170 °C

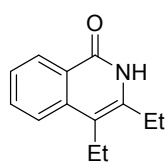

{Lit Rep<sup>7b</sup> 173-175 °C }; FT-IR (KBr) 3399, 3019, 1651, 1384, 1215  $\text{cm}^{-1}$ ;  $^1\text{H}$

NMR (400 MHz,  $\text{CDCl}_3$ ):  $\delta$  11.24 (s, 1H), 8.47 (d,  $J$  = 7.8 Hz, 1H), 7.71-7.65 (m, 2H), 7.46-7.42 (m, 1H), 2.79-2.71 (m, 4H), 1.34 (t,  $J$  = 7.6 Hz, 3H), 1.21

(t,  $J$  = 7.5 Hz, 3H) ppm;  $^{13}\text{C}$  NMR (100 MHz,  $\text{CDCl}_3$ ):  $\delta$  164.1, 139.4, 138.4, 132.4, 127.8, 125.3, 122.9, 114.0, 24.3, 19.6, 15.0, 14.1 ppm; HRMS (ESI) calcd for  $\text{C}_{13}\text{H}_{16}\text{NO}$   $[\text{M} + \text{H}]$  202.1232 found 202.1238.

### 3,4-dipropylisoquinolin-1(2H)-one (4af).<sup>7a</sup>

Off-white solid;  $R_f = 0.54$  (40% ethyl acetate/hexane); Yield; 182 mg (78%); mp: 174-176 °C

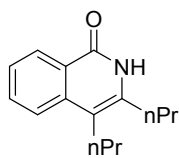

{Lit Rep<sup>7a</sup> 176-180 °C }; FT-IR (KBr) 3399, 3019, 1654, 1384, 1215  $\text{cm}^{-1}$ ;

$^1\text{H}$  NMR (400 MHz,  $\text{CDCl}_3$ ):  $\delta$  10.88 (s, 1H), 8.45 (d,  $J = 8.0$  Hz, 1H), 7.67

(d,  $J = 3.7$  Hz, 1H), 7.46-7.42 (m, 1H), 2.72-2.65 (m, 4H), 1.79-1.70 (m, 3H),

1.65-1.58 (m, 2H), 1.56-1.04 (m, 6H) ppm;  $^{13}\text{C}$  NMR (100 MHz,  $\text{CDCl}_3$ ):  $\delta$  163.9, 138.6,

138.3, 132.4, 127.7, 125.3, 122.2, 123.1, 113.1, 33.0, 28.7, 23.7, 22.9, 14.4, 14.1 ppm;

HRMS (ESI) calcd for  $\text{C}_{15}\text{H}_{20}\text{NO}$  [ $\text{M} + \text{H}$ ] 230.1545 found 230.1545.

#### ethyl 1-oxo-3-phenyl-1,2-dihydroisoquinoline-4-carboxylate (4ah).<sup>8</sup>

Off-white solid;  $R_f = 0.50$  (40% ethyl acetate/hexane); Yield; 197 mg (66%); mp: 162-164

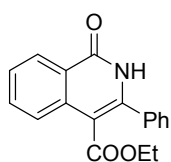

°C {Lit Rep<sup>8</sup> 165-167 °C}; FT-IR (KBr) 3389, 1711, 1653, 1489, 1278  $\text{cm}^{-1}$ ;

$^1\text{H}$  NMR (400 MHz,  $\text{CDCl}_3$ ):  $\delta$  10.23 (s, 1H), 8.37 (dd,  $J_1 = 8.0$  Hz,  $J_2 = 0.8$

Hz, 1H), 7.94 (d,  $J = 8.2$  Hz, 1H), 7.75-7.71 (m, 1H), 7.55-7.47 (m, 6H), 4.07

(q,  $J = 14.3$  Hz, 2H), 0.91 (t,  $J = 14.3$  Hz, 3H) ppm;  $^{13}\text{C}$  NMR (100 MHz,  $\text{CDCl}_3$ ):  $\delta$  167.2,

163.1, 141.9, 135.3, 134.8, 133.5, 129.9, 128.8, 128.2, 1277, 127.2, 124.6, 110.4, 61.3, 13.6

ppm; HRMS (ESI) calcd for  $\text{C}_{18}\text{H}_{16}\text{NO}_3$  [ $\text{M} + \text{H}$ ] 294.1130 found 294.1130.

#### 4-methyl-3-phenylisoquinolin-1(2H)-one (4ag).<sup>7a</sup>

Off-white solid;  $R_f = 0.48$  (40% ethyl acetate/hexane); Yield; 187 mg (78%); mp: 202-204 °C

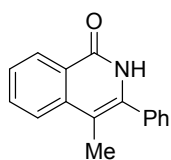

{Lit Rep<sup>7a</sup> 200-204 °C }; FT-IR (KBr) 3394, 3019, 1651, 1384, 1215  $\text{cm}^{-1}$ ;  $^1\text{H}$

NMR (400 MHz,  $\text{CDCl}_3$ ):  $\delta$  9.17 (s, 1H), 8.44 (d,  $J = 7.9$  Hz, 1H), 7.64 (d,  $J =$

3.6 Hz, 2H), 7.54-7.46 (m, 6H), 2.26 (s, 3H) ppm;  $^{13}\text{C}$  NMR (100 MHz,

$\text{CDCl}_3$ ):  $\delta$  162.8, 138.9, 136.9, 135.4, 132.7, 129.5, 129.1, 128.7, 127.8, 126.4, 125.5, 123.7,

109.2, 13.9 ppm; HRMS (ESI) calcd for  $\text{C}_{16}\text{H}_{14}\text{NO}$  [ $\text{M} + \text{H}$ ] 236.1075 found 236.1075.

#### 3,4-bis(4-methylphenyl)isoquinolin-1(2H)-one (4bb).<sup>7b</sup>

Off-white solid;  $R_f$  = 0.50 (40% ethyl acetate/hexane); Yield; 282 mg (85%); mp: 250-252

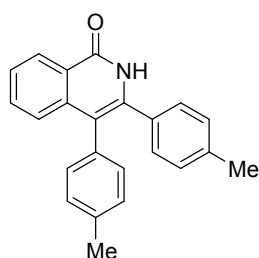

$^{\circ}\text{C}$  {Lit Rep<sup>7b</sup> 254-256  $^{\circ}\text{C}$ }; FT-IR (KBr) 3392, 3019, 1649, 1388, 1215  $\text{cm}^{-1}$ ;  $^1\text{H}$  NMR (400 MHz,  $\text{DMSO}-d_6$ ):  $\delta$  11.42 (s, 1H), 8.32-8.29 (m, 1H), 7.65-7.60 (m, 1H), 7.52-7.48 (m, 1H), 7.15-7.12 (m, 5H), 7.05-7.03 (m, 3H), 2.29 (s, 3H), 2.25 (s, 3H) ppm;  $^{13}\text{C}$  NMR (100

MHz,  $\text{DMSO}-d_6$ ):  $\delta$  162.9, 139.1, 138.6, 137.2, 136.9, 132.9, 132.6, 132.4, 131.7, 129.2, 129.1, 127.5, 126.4, 125.8, 125.1, 117.0, 21.4 ppm; HRMS (ESI) calcd for  $\text{C}_{23}\text{H}_{20}\text{NO}$  [ $\text{M} + \text{H}$ ] 326.1545 found 326.1545.

### 3,4-bis[4-(*tert*-butyl)phenyl]isoquinolin-1(2*H*)-one (4ad).

Off-white solid;  $R_f$  = 0.52 (40% ethyl acetate/hexane); Yield; 346 mg (83%); mp: 258-260

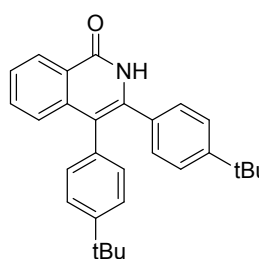

$^{\circ}\text{C}$ ; FT-IR (KBr) 3398, 3019, 1651, 1384, 1215  $\text{cm}^{-1}$ ;  $^1\text{H}$  NMR (400 MHz,  $\text{DMSO}-d_6$ ):  $\delta$  11.40 (s, 1H), 8.31 (d,  $J$  = 7.9 Hz, 1H), 7.64 (d,  $J$  = 7.0 Hz, 1H), 7.50 (t,  $J$  = 8.0 Hz, 1H), 7.31 (d,  $J$  = 8.2 Hz, 2H), 7.23 (d,  $J$  = 8.4 Hz, 2H), 7.17-7.13 (m, 3H), 7.07 (d,  $J$  = 8.2 Hz, 2H), 1.26

(s, 9H), 1.21 (s, 9H) ppm;  $^{13}\text{C}$  NMR (100 MHz,  $\text{DMSO}-d_6 + \text{CDCl}_3$ ):  $\delta$  161.6, 150.2, 149.0, 138.2, 138.1, 132.7, 132.0, 131.7, 131.2, 129.3, 126.6, 125.7, 124.8, 124.6, 124.1, 115.2, 34.1, 34.0, 30.9, 30.8 ppm; HRMS (ESI) calcd for  $\text{C}_{29}\text{H}_{32}\text{NO}$  [ $\text{M} + \text{H}$ ] 410.2484 found 410

2484.

### 6-methoxy-3,4-diphenylisoquinolin-1(2*H*)-one (4ba).<sup>7b</sup>

Off-white solid;  $R_f$  = 0.50 (40% ethyl acetate/hexane); Yield; 216 mg (78%); mp: 223-225

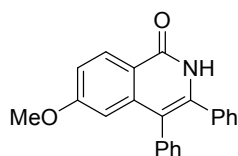

$^{\circ}\text{C}$  {Lit Rep<sup>7b</sup> 225  $^{\circ}\text{C}$  }; FT-IR (KBr) 3396, 2928, 1644, 1387, 1218  $\text{cm}^{-1}$ ;  $^1\text{H}$  NMR (400 MHz,  $\text{DMSO}-d_6$ ):  $\delta$  11.36 (s, 1H), 8.26 (d,  $J$  = 8.8 Hz, 1H), 7.33-7.28 (m, 3H), 7.23 (s, 5H), 7.17-7.14 (m, 3H), 6.52 (d,  $J$  = 2.4

Hz, 1H), 3.69 (s, 3H) ppm;  $^{13}\text{C}$  NMR (100 MHz,  $\text{DMSO-}d_6 + \text{CDCl}_3$ ):  $\delta$  162.2, 161.8, 140.1, 135.4, 134.4, 131.2, 129.1, 128.8, 127.8, 127.3, 126.6, 118.6, 115.8, 114.4, 106.8, 54.7 ppm; HRMS (ESI) calcd for  $\text{C}_{22}\text{H}_{18}\text{NO}_2$  [ $\text{M} + \text{H}$ ] 328.1338 found 328.1338.

**4,6,7-trimethyl-3-phenylisoquinolin-1(2H)-one (4bg).**

Off-white solid;  $R_f$  = 0.52 (40% ethyl acetate/hexane); Yield; 140 mg (62%); mp: 200-202

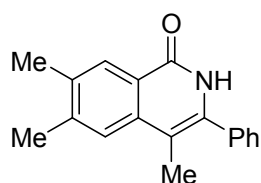

$^{\circ}\text{C}$ ; FT-IR (KBr) 3849, 3394, 1647, 1384, 1215  $\text{cm}^{-1}$ ;  $^1\text{H}$  NMR (400 MHz,  $\text{CDCl}_3$ ):  $\delta$  8.51 (s, 1H), 8.24 (s, 1H), 7.52-7.46 (m, 6H), 2.48 (s, 3H), 2.45 (s, 3H), 2.26 (s, 3H) ppm;  $^{13}\text{C}$  NMR (100 MHz,  $\text{CDCl}_3$ ):  $\delta$

162.5, 142.7, 137.1, 135.9, 130.5, 129.3, 128.9, 128.8, 128.4, 127.9, 124.3, 123.5, 109.0, 20.7, 19.8, 13.9 ppm; HRMS (ESI) calcd for  $\text{C}_{18}\text{H}_{18}\text{NO}$  [ $\text{M} + \text{H}$ ] 264.1388 found 264.1388.

**6,7-dimethyl-3,4-bis(4-methylphenyl)isoquinolin-1(2H)-one (4cb).**

Off-white solid;  $R_f$  = 0.48 (40% ethyl acetate/hexane); Yield; 212 mg (70%); mp: 272-274

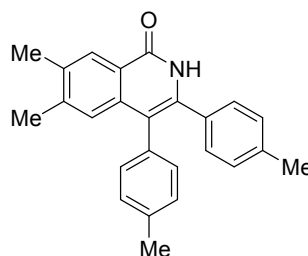

$^{\circ}\text{C}$ ; FT-IR (KBr) 3392, 3019, 1647, 1387, 1215  $\text{cm}^{-1}$ ;  $^1\text{H}$  NMR (400 MHz,  $\text{DMSO-}d_6$ ):  $\delta$  11.23 (s, 1H), 8.07 (s, 1H), 7.13-7.06 (m, 4H), 7.03-7.00 (m, 4H), 6.91 (s, 1H), 2.37 (s, 3H), 2.30 (s, 3H), 2.24 (s, 3H), 2.22 (s, 3H) ppm;  $^{13}\text{C}$  NMR (100 MHz,  $\text{DMSO-}d_6 +$

$\text{CDCl}_3$ ):  $\delta$  162.3, 141.8, 137.6, 137.1, 136.2, 135.3, 133.5, 132.4, 131.8, 129.9, 128.6, 127.2, 125.7, 123.6, 115.5, 21.3, 21.2, 20.5, 19.8 ppm; HRMS (ESI) calcd for  $\text{C}_{25}\text{H}_{24}\text{NO}$  [ $\text{M} + \text{H}$ ] 354.1858 found 354.1860.

**5,6,7-trimethoxy-3,4-bis(4-methylphenyl)isoquinolin-1(2H)-one (4db).**

Red solid;  $R_f$  = 0.42 (50% ethyl acetate/hexane); Yield; 178 mg (68%); mp: 258-260  $^{\circ}\text{C}$ ; FT-

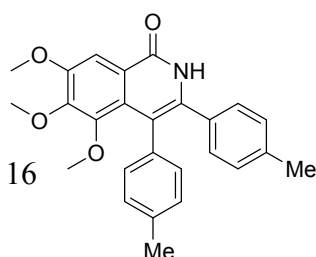

IR (KBr) 3395, 3019, 1645, 1474, 1215  $\text{cm}^{-1}$ ;  $^1\text{H}$  NMR (400 MHz,  $\text{CDCl}_3$ ):  $\delta$  8.67 (s, 1H), 7.82 (s, 1H), 7.09-6.99 (m, 8H), 4.03 (s,

3H), 3.91 (s, 3H), 3.15 (s, 3H), 2.32 (s, 3H), 2.29 (s, 3H) ppm;  $^{13}\text{C}$  NMR (100 MHz,  $\text{CDCl}_3$ ):  $\delta$  161.7, 153.1, 150.5, 147.9, 138.0, 136.2, 135.6, 135.5, 132.9, 131.1, 129.3, 128.9, 128.8, 127.9, 127.7, 115.0, 104.4, 60.9, 60.8, 56.2, 21.3, 21.3 ppm; HRMS (ESI) calcd for  $\text{C}_{26}\text{H}_{26}\text{NO}_4$   $[\text{M} + \text{H}]$  416.1862 found 416.1862.

**5, 6, 7-trimethoxy-3,4-diphenylisoquinolin-1(2H)-one (4da).**

Red solid;  $R_f$  = 0.44 (50% ethyl acetate/hexane); Yield; 160 mg (65%); mp: 252-254 °C; FT-

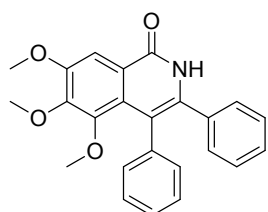

IR (KBr) 3391, 3016, 1642, 1418, 1216  $\text{cm}^{-1}$ ;  $^1\text{H}$  NMR (400 MHz,  $\text{CDCl}_3$ ):  $\delta$  8.63 (s, 1H), 7.81 (s, 1H), 7.26 (s, 1H), 7.20-7.13 (m, 9H), 4.02 (s, 3H), 3.90 (s, 3H), 3.13 (s, 3H), ppm;  $^{13}\text{C}$  NMR (100 MHz,  $\text{CDCl}_3$ ):  $\delta$  161.8, 153.2, 150.4, 147.9, 138.7, 136.3, 35.6, 131.4, 129.6, 128.2, 128.1, 126.9,

126.2, 115.3, 104.4, 60.9, 60.8, 56.2 ppm; HRMS (ESI) calcd for  $\text{C}_{24}\text{H}_{22}\text{NO}_4$   $[\text{M} + \text{H}]$  388.1549 found 388.1549.

**6-fluoro-3,4-bis(4-methylphenyl)isoquinolin-1(2H)-one (4eb).**

Off-white solid;  $R_f$  = 0.46 (40% ethyl acetate/hexane); Yield; 240 mg (77%); mp: 252-254

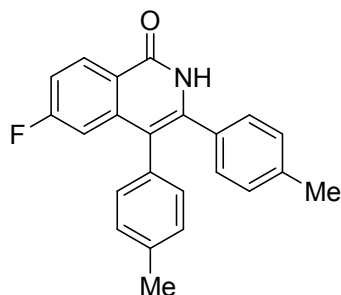

°C; FT-IR (KBr) 3402, 2923, 1651, 1446, 1216  $\text{cm}^{-1}$ ;  $^1\text{H}$  NMR (400 MHz,  $\text{CDCl}_3$ ):  $\delta$  8.94 (s, 1H), 8.49-8.45 (m, 1H), 7.19-7.09 (m, 5H), 7.06-6.96 (m, 5H), 2.36 (s, 3H), 2.30 (s, 3H) ppm;  $^{13}\text{C}$  NMR (100 MHz,  $\text{CDCl}_3$ ):  $\delta$  166.9, 164.4, 162.5, 141.7 (d,  $J$  = 10 Hz), 138.7 (d,  $J$  = 12 Hz), 137.2, 132.4, 131.9, 131.5, 130.9 (d,  $J$

= 10 Hz), 129.4, 129.2 (d,  $J$  = 13 Hz), 121.7, 116.6, 115.0 (d,  $J$  = 24 Hz), 110.9 (d,  $J$  = 23 Hz), 21.4 ppm; HRMS (ESI) calcd for  $\text{C}_{23}\text{H}_{19}\text{NOF}$   $[\text{M} + \text{H}]$  344.1451 found 344.1451.

**6-chloro-3,4-diphenylisoquinolin-1(2H)-one (4fa).<sup>7b</sup>**

Off-white solid;  $R_f$  = 0.50 (40% ethyl acetate/hexane); Yield; 225 mg (82%); mp: 242-244 °C

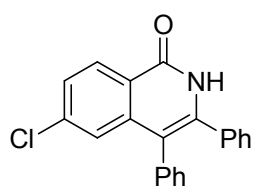

{Lit Rep<sup>7b</sup> 246-248 °C }; FT-IR (KBr) 3401, 3021, 1652, 1441, 1215

cm<sup>-1</sup>; <sup>1</sup>H NMR (400 MHz, DMSO-*d*<sub>6</sub>):  $\delta$  11.71 (s, 1H), 8.32 (d,  $J$  = 8.4

Hz, 1H), 7.57-7.54 (m, 1H), 7.36-7.29 (m, 4H), 7.24 (s, 4H), 7.18-7.16

(m, 2H), 7.05 (d,  $J$  = 2.0 Hz, 1H) ppm; <sup>13</sup>C NMR (100 MHz, DMSO-*d*<sub>6</sub>):  $\delta$  161.4, 140.3,

139.6, 137.6, 135.1, 134.1, 131.6, 129.7, 129.3, 128.4, 127.7, 127.3, 126.4, 123.7, 123.6,

114.5 ppm; HRMS (ESI) calcd for C<sub>21</sub>H<sub>15</sub>NOCl [M + H] 332.0842 found 332.0842.

#### 6-bromo-3,4-diphenylisoquinolin-1(2H)-one (4ga).<sup>7a</sup>

Off-white solid;  $R_f$  = 0.46 (40% ethyl acetate/hexane); Yield; 200 mg (80%); mp: 246-248 °C

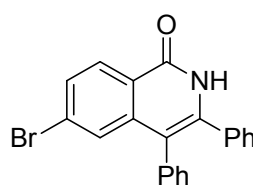

{Lit Rep<sup>7a</sup> 250 °C }; FT-IR (KBr) 3410, 2997, 1655, 1389, 1216 cm<sup>-1</sup>;

<sup>1</sup>H NMR (400 MHz, DMSO-*d*<sub>6</sub>):  $\delta$  11.71 (s, 1H), 8.24 (d,  $J$  = 8.5 Hz,

1H), 7.87 (d,  $J$  = 8.5 Hz, 1H), 7.72-7.67 (m, 2H), 7.35-7.31 (m, 3H),

7.91-7.22 (m, 5H), 7.22-7.16 (m, 2H) ppm; <sup>13</sup>C NMR (100 MHz, DMSO-*d*<sub>6</sub> + CDCl<sub>3</sub>):  $\delta$

161.2, 140.1, 139.8, 135.0, 134.1, 131.6, 131.5, 129.6, 129.2, 129.0, 128.3, 127.6, 127.3,

126.8, 126.7, 126.7, 123.8, 114.3 ppm; HRMS (ESI) calcd for C<sub>21</sub>H<sub>15</sub>NOBr [M + H]

376.0337 found 376.0337.

#### 6-nitro-3,4-diphenylisoquinolin-1(2H)-one (4ha).<sup>7a</sup>

Off-white solid;  $R_f$  = 0.42 (40% ethyl acetate/hexane); Yield; 220 mg (82%); mp 251-252 °C

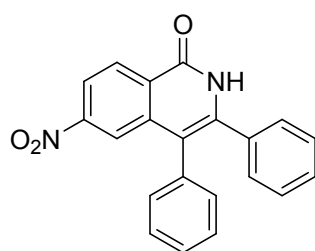

{Lit Rep<sup>7a</sup> 251-252 °C }; FT-IR (KBr) 3388, 1659, 1531, 1387,

1215 cm<sup>-1</sup>; <sup>1</sup>H NMR (400 MHz, CDCl<sub>3</sub>):  $\delta$  9.99 (s, 1H), 8.58 (d,  $J$

= 8.7 Hz, 1H), 8.22 (s, 2H), 7.36-7.28 (m, 8H), 7.18 (s, 2H) ppm;

<sup>13</sup>C NMR (100 MHz, CDCl<sub>3</sub>):  $\delta$  161.8, 150.8, 139.8, 139.7, 134.4,

134.3, 131.7, 129.7, 129.3, 129.0, 128.6, 128.2, 121.3, 120.2, 117.3 ppm; HRMS (ESI) calcd

for C<sub>21</sub>H<sub>15</sub>N<sub>2</sub>O<sub>3</sub> [M + H] 343.1083 found 343.1083.

**7-chloro-3,4-bis(4-methylphenyl)isoquinolin-1(2H)-one (4ib).**

White solid;  $R_f$  = 0.65 (40% ethyl acetate/hexane); Yield; (produced in 1:1 ratio); mp: 150-

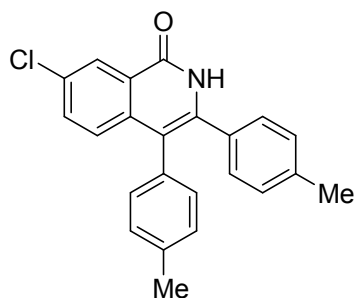

152 °C; FT-IR (KBr) 3400, 3019, 1632, 1384, 1215  $\text{cm}^{-1}$ ;  $^1\text{H}$  NMR (400 MHz,  $\text{CDCl}_3$ ):  $\delta$  9.99 (s, 1H), 8.46 (s, 1H), 7.51 (d,  $J$  = 8.8 Hz, 1H), 7.31 (d,  $J$  = 8.8 Hz, 1H), 7.14-7.11 (m, 4H), 7.07-7.03 (m, 4H), 2.34 (s, 3H), 2.31 (s, 3H) ppm;  $^{13}\text{C}$  NMR (100 MHz,  $\text{CDCl}_3$ ):  $\delta$  162.6, 138.8, 137.6, 133.2, 133.0, 132.6,

132.4, 131.6, 131.5, 129.7, 129.4, 129.3, 129.1, 127.6, 126.8, 117.2, 21.4 ppm; HRMS (ESI) calcd for  $\text{C}_{23}\text{H}_{19}\text{NOCl}$  [ $\text{M} + \text{H}$ ] 360.1155 found 360.1157.

**5-chloro-3,4-bis(4-methylphenyl)isoquinolin-1(2H)-one (4ib').**

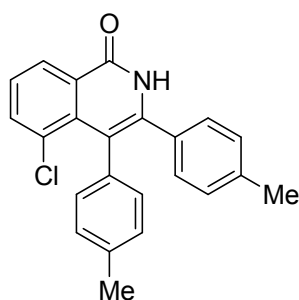

White solid;  $R_f$  = 0.56 (50% ethyl acetate/hexane); mp: 200-202 °C; FT-IR (KBr) 3400, 3019, 1632, 1384, 1215  $\text{cm}^{-1}$ ;  $^1\text{H}$  NMR (400 MHz,  $\text{CDCl}_3$ ):  $\delta$  9.30 (s, 1H), 8.45 (d,  $J$  = 7.9 Hz, 1H), 7.64-7.62 (m, 1H), 7.39-7.35 (m, 1H), 7.02-6.98 (m, 8H), 2.31 (s, 3H), 2.28 (s, 3H) ppm;  $^{13}\text{C}$  NMR (100 MHz,  $\text{CDCl}_3$ ):  $\delta$  162.1, 139.7, 138.4,

136.6, 135.1, 134.3, 132.5, 132.1, 131.3, 129.3, 129.2, 128.8, 128.2, 127.2, 126.8, 115.6, 21.4, 21.3 ppm; HRMS (ESI) calcd for  $\text{C}_{23}\text{H}_{19}\text{NOCl}$  [ $\text{M} + \text{H}$ ] 360.1155 found 360.1157.

**3,4-dipropyl-6-(trifluoromethyl)isoquinolin-1(2H)-one (4cf).**

Off-white solid;  $R_f$  = 0.48 (40% ethyl acetate/hexane); Yield; 149 mg (72%); mp: 120-122

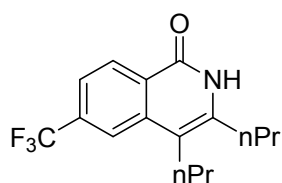

°C; FT-IR (KBr) 3430, 1650, 1384, 1217  $\text{cm}^{-1}$ ;  $^1\text{H}$  NMR (400 MHz,  $\text{CDCl}_3$ ):  $\delta$  11.27 (s, 1H), 8.55 (d,  $J$  = 8.3 Hz, 1H), 7.92 (s, 1H), 7.64 (d,  $J$  = 8.3, 1H), 7.02 (s, 1H), 2.75-2.69 (m, 4H), 1.82-1.72 (m, 2H),

1.64-1.57 (m, 2H), 1.09-1.01 (m, 6H) ppm;  $^{13}\text{C}$  NMR (100 MHz,  $\text{CDCl}_3$ ):  $\delta$  163.3, 140.2,

138.6, 134.0 (d,  $J = 29.0$  Hz), 128.8, 127.2, 125.5, 122.8, 121.4, 120.5, 113.1, 33.1, 28.5, 23.7, 22.9, 14.2 (d,  $J = 21.0$  Hz) ppm; HRMS (ESI) calcd for  $C_{16}H_{19}NOF_3$   $[M + H]$  298.1419 found 298.1419.

**3,4-diphenyl-6-(trifluoromethyl)isoquinolin-1(2H)-one (4ja).**<sup>7a,7b</sup>

Off-white solid;  $R_f = 0.62$  (50% ethyl acetate/hexane); Yield; 224 mg (88%); mp 228-230 °C

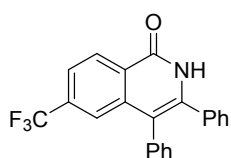

{Lit Rep<sup>7a</sup> 225 °C }; FT-IR (KBr) 3390, 3019, 1660, 1382, 1223  $cm^{-1}$ ;  $^1H$

NMR (400 MHz,  $CDCl_3$ ):  $\delta$  9.01 (s, 1H), 8.59 (d,  $J = 8.0$  Hz, 1H), 7.71-

7.69 (m, 1H), 7.62 (s, 1H), 7.35 -7.34 (m, 3H), 7.3-7.26 (m, 3H), 7.24 –

7.21 (m, 2H), 7.18-7.16 (m, 2H) ppm;  $^{13}C$  NMR (100 MHz,  $CDCl_3$ ):  $\delta$  162.5, 138.9 (d,  $J = 5.0$  Hz), 134.74 (d,  $J = 25.0$  Hz), 131.8, 129.4, 129.1, 128.8 (d,  $J = 7.0$  Hz), 128.5, 127.7, 127.3, 122.9, 122.7, 117.1 ppm; HRMS (ESI) calcd for  $C_{22}H_{15}NOF_3$   $[M + H]$  366.1106 found 366.1106.

**4,5-Diphenylthieno[2,3-c]pyridin-7(6H)-one (4ka).**<sup>7b</sup>

White solid;  $R_f = 0.56$  (50% ethyl acetate/hexane); Yield; 179 mg (60%); mp 263-265 °C;

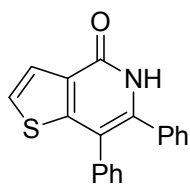

{Lit Rep<sup>7b</sup> 265-267 °C } FT-IR (KBr) 3390, 3019, 1660, 1384, 1216  $cm^{-1}$ ;  $^1H$

NMR (400 MHz,  $DMSO-d_6$ ):  $\delta$  11.76 (s, 1H), 8.03 (d,  $J = 5.2$  Hz, 1H), 7.28-

7.23 (m, 8H), 7.16-7.14 (m, 2H), 6.93 (d,  $J = 5.2$  Hz, 1H) ppm;  $^{13}C$  NMR

(100 MHz,  $DMSO-d_6$ ):  $\delta$  158.0, 146.7, 139.8, 136.3, 134.1, 133.9, 130.7, 130.0, 128.3, 128.2, 128.0, 127.8, 126.9, 124.5, 114.7 ppm; HRMS (ESI) calcd for  $C_{19}H_{14}NOS$   $[M + H]$  304.0796 found 304.0796.

**3,4-bis(4-methoxyphenyl)-9-methyl-2,9-dihydro-1H- $\beta$ -carbolin-1-one (4lc).**

Light-brown solid;  $R_f = 0.30$  (50% ethyl acetate/hexane); Yield; 199 mg (65%); mp: 271-273

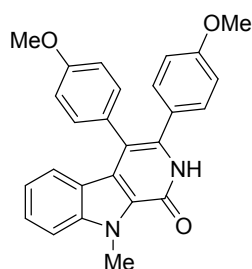

°C; FT-IR (KBr) 3421, 3019, 1640, 1384, 1215  $\text{cm}^{-1}$ ;  $^1\text{H}$  NMR (400 MHz,  $\text{DMSO-}d_6$ ):  $\delta$  11.48 (s, 1H), 7.62 (d,  $J = 8.4$  Hz, 1H), 7.42-7.39 (m, 1H), 7.18-7.16 (m, 4H), 6.96-6.93 (m, 3H), 6.79 (d,  $J = 8.8$  Hz, 1H), 6.67 (d,  $J = 8.1$  Hz, 1H), 4.31 (s, 3H), 3.79 (s, 3H), 3.72 (s, 3H)

ppm;  $^{13}\text{C}$  NMR of this compound was not obtained due to its very very low solubility; HRMS (ESI) calcd for  $\text{C}_{26}\text{H}_{23}\text{N}_2\text{O}_3$  [ $\text{M} + \text{H}$ ] 411.1709 found 411.1709.

#### 4,9-dimethyl-3-phenyl-2,9-dihydro-1H- $\beta$ -carboline-1-one (4lg).

Orange solid;  $R_f = 0.50$  (50% ethyl acetate/hexane); Yield; 114 mg (58%); mp: 268-270 °C;

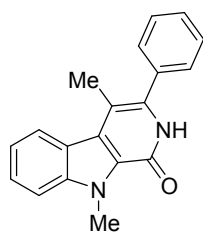

FT-IR (KBr) 3420, 1644, 1215  $\text{cm}^{-1}$ ;  $^1\text{H}$  NMR (400 MHz,  $\text{DMSO-}d_6$ ):  $\delta$  11.36 (s, 1H), 8.18 (d,  $J = 7.9$  Hz, 1H), 7.68 (d,  $J = 8.4$  Hz, 1H), 7.55-7.46 (m, 6H), 7.26 (t,  $J = 7.3$  Hz, 1H), 4.30 (s, 3H), 2.45 (s, 3H) ppm;  $^{13}\text{C}$  NMR (100 MHz,  $\text{DMSO-}d_6$ ): 155.6, 140.6, 134.2, 133.9, 129.9, 128.6, 128.3,

126.7, 126.0, 125.8, 122.9, 122.0, 120.4, 110.0, 107.9, 31.5, 15.6 ppm; HRMS (ESI) calcd for  $\text{C}_{19}\text{H}_{19}\text{N}_2\text{O}$  [ $\text{M} + \text{H}$ ] 289.1341 found 289.1340.

#### 9-benzyl-3,4-diphenyl-2,9-dihydro-1H- $\beta$ -carboline-1-one (4ma).

Light- Yellow solid;  $R_f = 0.60$  (50% ethyl acetate/hexane); Yield; 157 mg (68%); mp: 298-

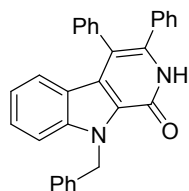

300 °C; FT-IR (KBr) 3427, 2989, 1644, 1386, 1219  $\text{cm}^{-1}$ ;  $^1\text{H}$  NMR (400 MHz,  $\text{DMSO-}d_6$ ):  $\delta$  11.73 (s, 1H), 7.64 (d,  $J = 8.5$  Hz, 1H), 7.38-7.36 (m, 3H), 7.32-7.28 (m, 8H), 7.28-7.23 (m, 4H), 6.88 (t,  $J = 7.9$  Hz, 1H), 6.58 (d,

$J = 8.2$  Hz, 1H), 6.18 (s, 2H) ppm;  $^{13}\text{C}$  NMR of this compound was not obtained due to its very very low solubility; HRMS (ESI) calcd for  $\text{C}_{30}\text{H}_{23}\text{N}_2\text{O}$  [ $\text{M} + \text{H}$ ] 427.1810 found 427.1810.

**9-benzyl-3,4-bis(4-methylphenyl)-2,9-dihydro-1H-pyrido[3,4-b]indol-1-one (4mb)**

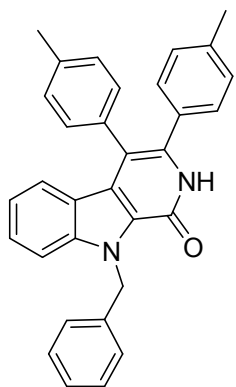

Brown solid;  $R_f$  = 0.48 (50% ethyl acetate/hexane); Yield; 167 mg (68%); mp: 188-190 °C; FT-IR (KBr) 3402, 2926, 1389  $\text{cm}^{-1}$ ;  $^1\text{H}$  NMR (400 MHz,  $\text{DMSO-}d_6$ ):  $\delta$  11.62 (s, 1H), 7.62 (d,  $J$  = 8.0 Hz, 1H), 7.35-7.33 (m, 1H), 7.30-7.29 (m, 4H), 7.24-7.21 (m, 2H), 7.18-7.15 (m, 5H), 7.06-7.04 (m, 2H), 6.88 (t,  $J$  = 8.0 Hz, 1H), 6.62 (d,  $J$  = 8.0 Hz, 1H) 6.17 (s, 2H), 2.36 (s, 3H), 2.25 (s, 3H) ppm;  $^{13}\text{C}$  NMR of this compound was

not obtained due to its very very low solubility; HRMS (ESI) calcd for  $\text{C}_{32}\text{H}_{27}\text{N}_2\text{O}$  [ $\text{M} + \text{H}$ ] 455.2123 found 455.2130.

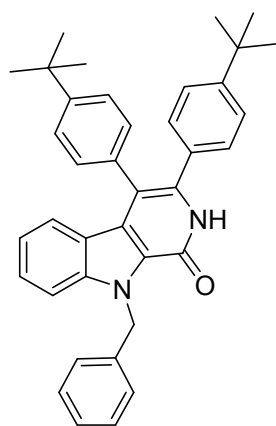

**9-benzyl-3,4-bis(4-(tert-butyl)phenyl)-2,9-dihydro-1H-pyrido[3,4-b]indol-1-one (4md)**

Brown solid;  $R_f$  = 0.55 (50% ethyl acetate/hexane); Yield; 210 mg (72%); mp 278-280 °C; FT-IR (KBr) 3401, 3020, 1639  $\text{cm}^{-1}$ ;  $^1\text{H}$  NMR (400 MHz,  $\text{DMSO-}d_6$ ):  $\delta$  11.58 (s, 1H), 7.62 (d,  $J$  = 8.0 Hz, 1H), 7.39-7.38 (m, 2H), 7.30-7.29 (m, 5H), 7.23-7.20 (m, 7H), 6.85 (t,  $J$  = 8.0 Hz, 1H), 6.52 (d,  $J$  = 8.0 Hz, 1H) 6.16 (s, 2H), 1.31 (s, 9H), 1.23 (s, 9H) ppm;  $^{13}\text{C}$

NMR of this compound was not obtained due to its very very low solubility; HRMS (ESI) calcd for  $\text{C}_{38}\text{H}_{39}\text{N}_2\text{O}$  [ $\text{M} + \text{H}$ ] 539.3062 found 539.3062.

**5-methyl-3,4-bis[4-methoxyphenyl]-2,5-dihydro-1H-pyrido[4,3-b]indol-1-one (4nc).**

Brown solid;  $R_f$  = 0.30 (50% ethyl acetate/hexane); Yield; 230 mg (72%); mp: 268-270 °C;

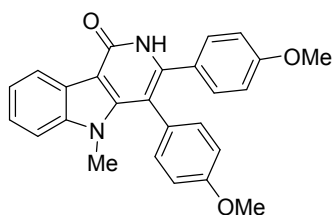

FT-IR (KBr) 3426, 2992, 1634, 1387, 1218  $\text{cm}^{-1}$ ;  $^1\text{H}$  NMR (400 MHz,  $\text{DMSO-}d_6$ ):  $\delta$  11.30 (s, 1H), 8.26 (d,  $J$  = 7.2 Hz, 1H), 7.49 (d,  $J$  = 8.2 Hz, 1H), 7.38-7.34 (m, 1H), 7.29-7.25 (m, 1H), 7.22-

7.16 (m, 1H), 6.89 (d,  $J = 8.7$  Hz, 2H), 6.79 (d,  $J = 8.8$  Hz, 1H), 3.76 (s, 3H), 3.72 (s, 3H), 3.16 (s, 3H) ppm;  $^{13}\text{C}$  NMR of this compound was not obtained due to its very very low solubility; HRMS (ESI) calcd for  $\text{C}_{27}\text{H}_{26}\text{NO}_3$  [ $\text{M} + \text{H}$ ] 411.1709 found 411.1709.

**5-methyl-3,4-bis[4-(*tert*-butyl)phenyl]-2,5-dihydro-1*H*-pyrido[4,3-*b*]indol-1-one (4nd).**

Light-brown solid;  $R_f = 0.48$  (50% ethyl acetate/hexane); Yield; 200 mg (58%); mp  $>300$  °C;

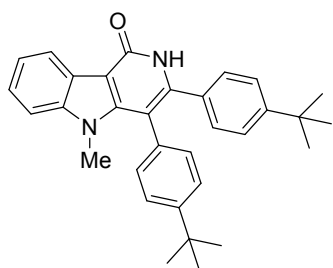

FT-IR (KBr) 3421, 2993, 1646, 1387, 1218  $\text{cm}^{-1}$ ;  $^1\text{H}$  NMR (400 MHz,  $\text{DMSO}-d_6$ ):  $\delta$  11.33 (s, 1H), 8.26 (d,  $J = 7.6$  Hz, 1H), 7.49 (d,  $J = 8.2$  Hz, 1H), 7.38-7.34 (m, 1H), 7.31-7.26 (m, 3H), 7.23-7.19 (m, 4H), 7.14 (d,  $J = 8.4$  Hz, 2H), 3.17 (s, 3H), 1.26 (s, 9H),

1.21 (s, 9H) ppm;  $^{13}\text{C}$  NMR of this compound was not due to its very very low solubility; HRMS (ESI) calcd for  $\text{C}_{32}\text{H}_{35}\text{N}_2\text{O}$  [ $\text{M} + \text{H}$ ] 463.2749 found 463.2747.

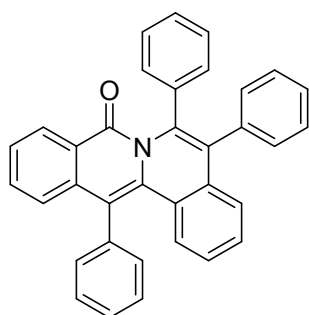

**5,6,13-triphenyl-13, 13a-dihydro-8*H*-isoquinolino[3,2-*a*]isoquinolin-8-one (6)<sup>9</sup>**

Light-Yellow solid;  $R_f = 0.65$  (20% ethyl acetate/hexane);  $^1\text{H}$  NMR (400 MHz,  $\text{CDCl}_3$ ):  $\delta$  8.25-8.23 (m, 1H), 7.61-7.59 (m, 1H), 7.58-7.52 (m, 5H),

7.50-7.40 (m, 1H), 7.35-7.33 (m, 1H), 7.28-7.25 (m, 4H), 7.24-7.23 (m, 3H), 7.22-7.14 (m, 2H), 7.12-7.01 (m, 4H), 6.89-6.85 (m, 1H) ppm;  $^{13}\text{C}$  NMR (100 MHz,  $\text{CDCl}_3$ ): 162.2, 138.6, 137.1, 136.3, 136.2, 133.8, 133.1, 132.3, 132.2, 131.5, 129.1, 129.0, 128.5, 128.1, 128.0, 127.6, 127.5, 127.1, 126.8, 126.7, 126.5, 126.3, 125.8, 125.7, 125.6, 117.0 ppm; HRMS (ESI) calcd for  $\text{C}_{35}\text{H}_{24}\text{NO}$  [ $\text{M} + \text{H}$ ] 474.1858 found 474.1863.

**Triphenylphosphine Oxide**

White solid;  $R_f = 0.35$  (50% ethyl acetate/hexane);  $^1\text{H}$  NMR (400 MHz,  $\text{CDCl}_3$ ):  $\delta$  7.71-7.60 (m, 6H), 7.56-7.54 (m, 3H), 7.50-7.45 (m, 6H) ppm;  $^{13}\text{C}$  NMR (100 MHz,  $\text{CDCl}_3$ ): 133.0, 132.1, 132.0, 131.9, 128.5, 128.4 ppm

## VII. Spectral Copies of Starting and Final Compounds

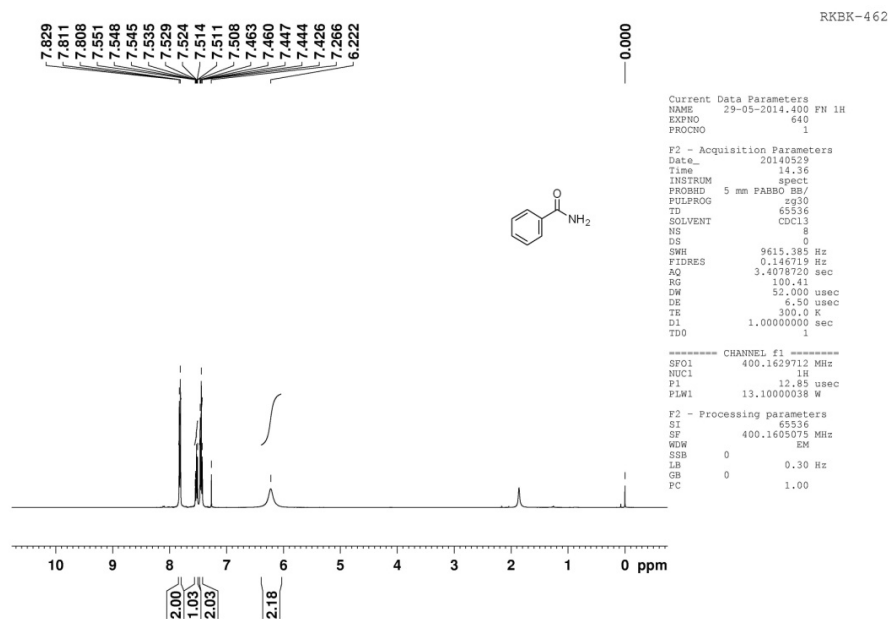

Fig. 5:  $^1\text{H}$  NMR of 5

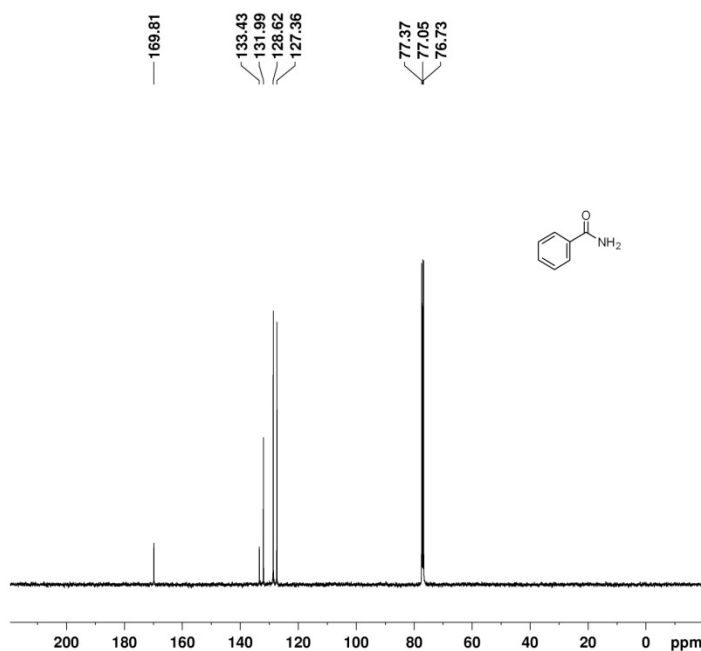

Current Data Parameters  
NAME: 29-05-2014-401 1H 13C  
EXPNO: 612  
PROCNO: 1

F2 - Acquisition Parameters  
DATE\_: 20140519  
TIME: 22:43  
INSTRUM: spect  
PROBHD: 5 mm PABBO 80  
PULPROG: zgpg30  
PCPDPRG2: waltz16  
SOLVENT: DMSO  
NS: 512  
DS: 4  
SWH: 24036.442 Hz  
FIDRES: 0.246799 Hz  
AQ: 1.362144 sec  
RG: 256.000  
WM: 6.50 mm  
WDW: EM  
SSB: 0.000000 sec  
LB: 0.000000 Hz  
GB: 0.000000 sec  
CB: 0

===== CHANNEL f1 =====  
NUC1: 13C-63454 Hz  
P1: 1.00  
PC1: 0.000000 M  
===== CHANNEL f2 =====  
NUC2: 1H-400.146 MHz  
P2: 1.00  
PC2: 0.000000 M  
===== CHANNEL f3 =====  
NAME: 29-05-2014-401 1H 13C  
EXPNO: 612  
PROCNO: 1  
F2 - Processing parameters  
F1: 100.626182 MHz  
F2: 400.146010 MHz  
F3: 0  
WDW: 0  
SSB: 0  
LB: 0  
GB: 0  
CB: 0

Fig. 6:  $^{13}\text{C}$  NMR of 5

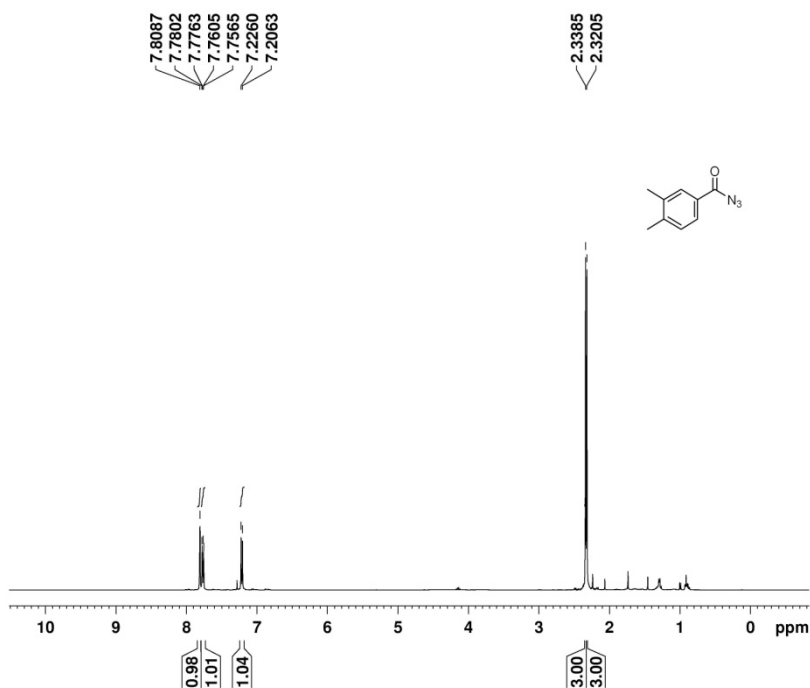

RKBR-466

Current Data Parameters  
NAME: 29-05-2014-401 1H  
EXPNO: 612  
PROCNO: 1

F2 - Acquisition Parameters  
DATE\_: 20140519  
TIME: 22:43  
INSTRUM: spect  
PROBHD: 5 mm PABBO 80  
PULPROG: zgpg30  
PCPDPRG2: waltz16  
SOLVENT: DMSO  
NS: 512  
DS: 4  
SWH: 8012.800 Hz  
FIDRES: 0.246799 Hz  
AQ: 1.362144 sec  
RG: 256.000  
WM: 6.50 mm  
WDW: EM  
SSB: 0.000000 sec  
LB: 0.000000 Hz  
GB: 0.000000 sec  
CB: 0

===== CHANNEL f1 =====  
NUC1: 13C-63454 Hz  
P1: 1.00  
PC1: 0.000000 M  
===== CHANNEL f2 =====  
NAME: 29-05-2014-401 1H 13C  
EXPNO: 612  
PROCNO: 1  
F2 - Processing parameters  
F1: 100.626182 MHz  
F2: 400.146010 MHz  
F3: 0  
WDW: 0  
SSB: 0  
LB: 0  
GB: 0  
CB: 0

Fig. 7:  $^1\text{H}$  NMR of 1c

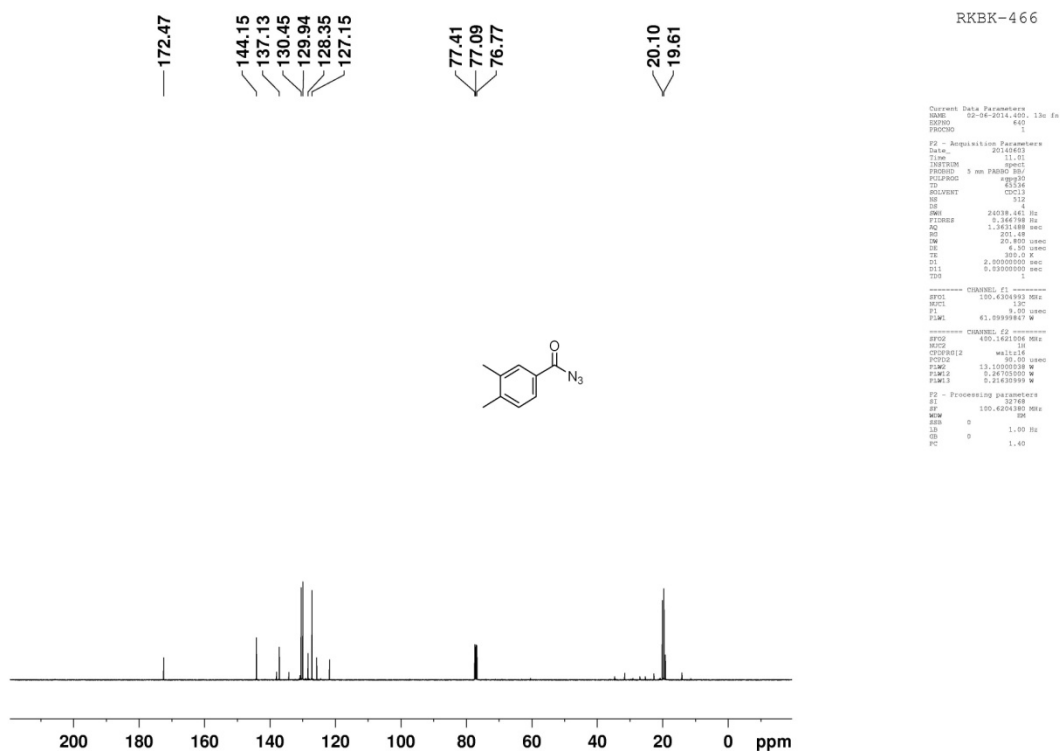

Fig. 8:  $^{13}\text{C}$  NMR of 1c

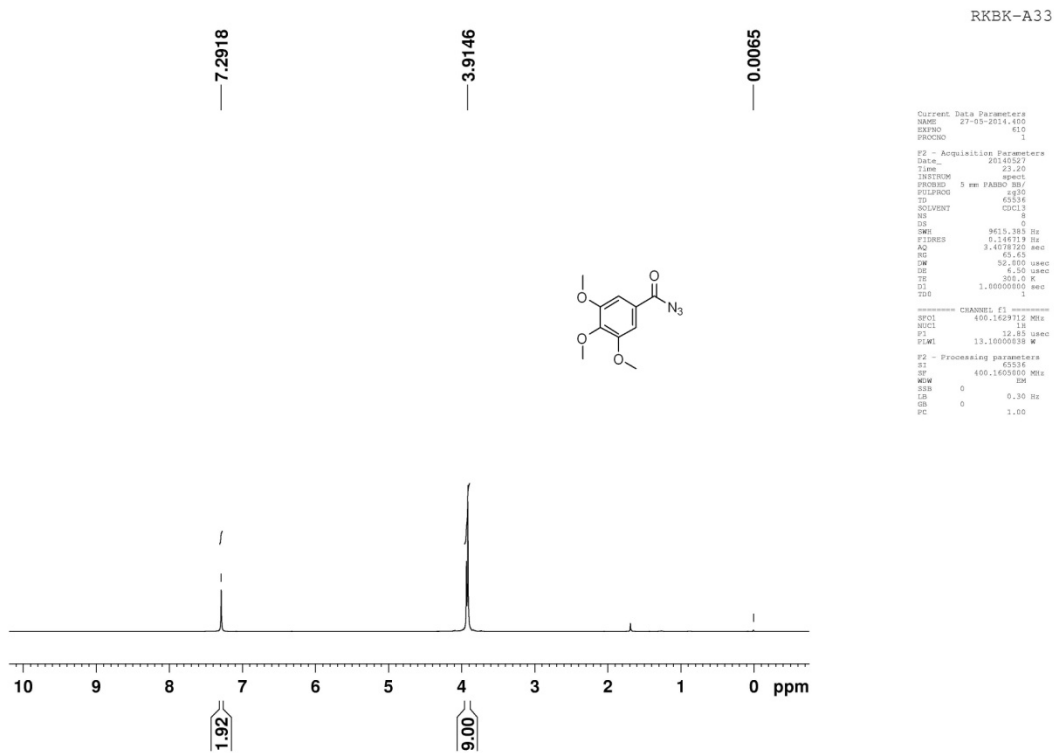

Fig. 9:  $^1\text{H}$  NMR of 1d

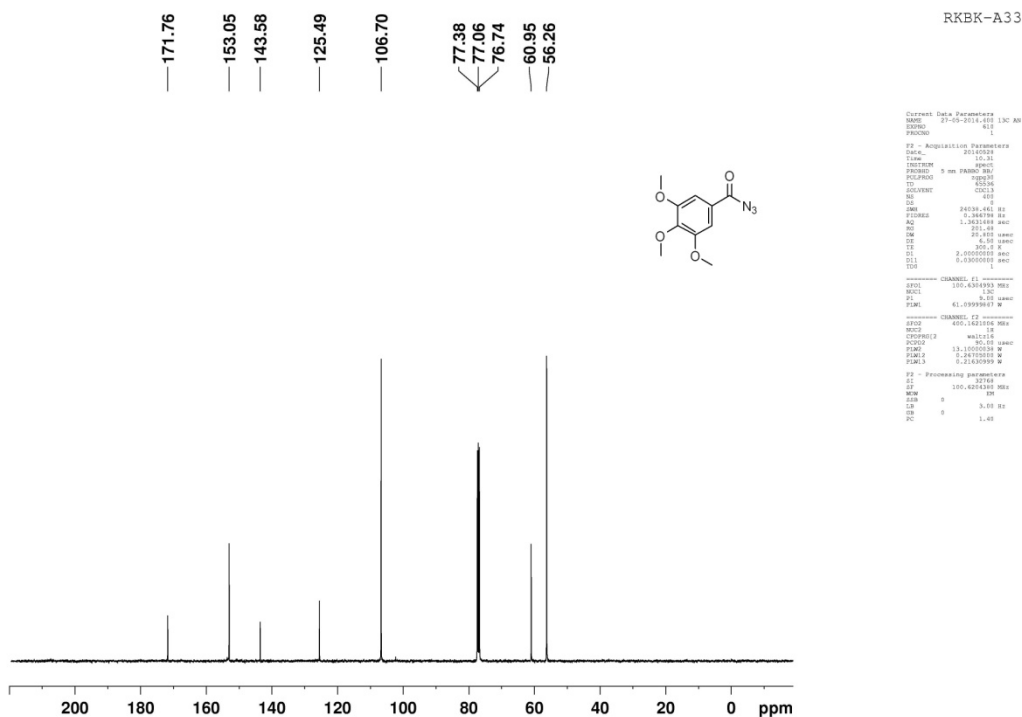

Fig. 10:  $^{13}\text{C}$  NMR of 1d

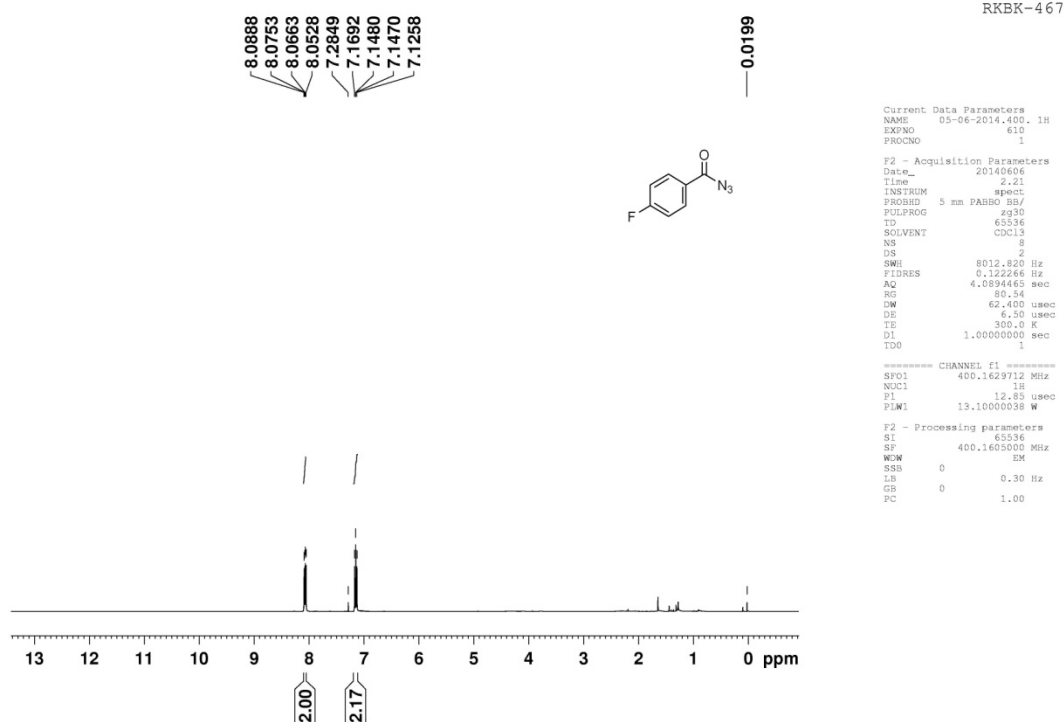

Fig. 11:  $^1\text{H}$  NMR of 1e

RKBK-467

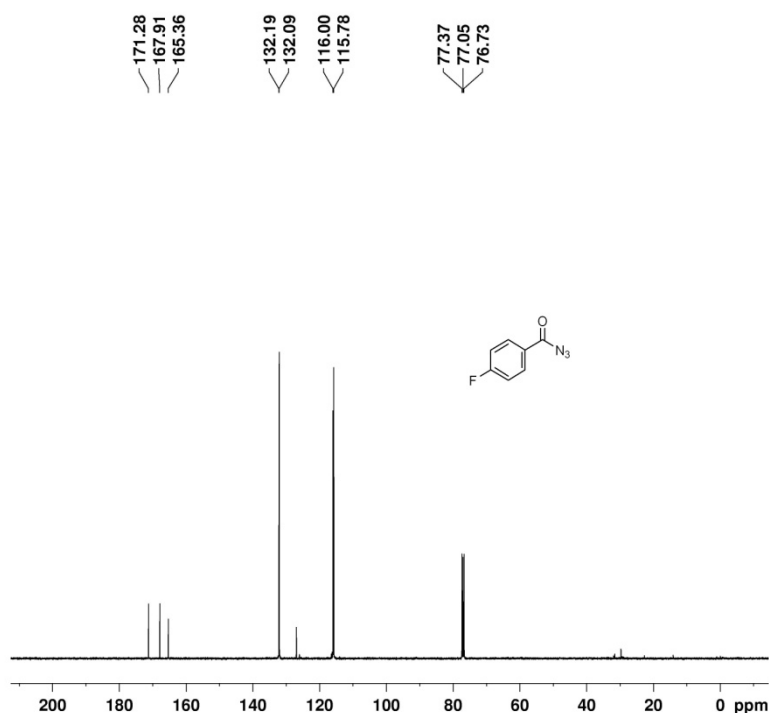Fig. 12:  $^{13}\text{C}$  NMR of 1e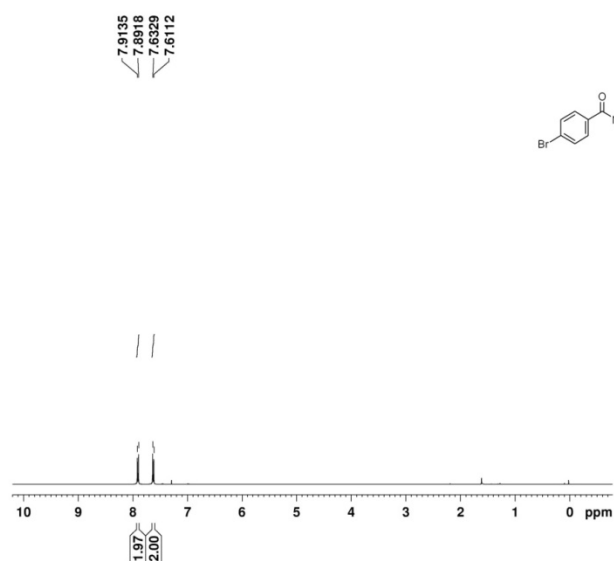Fig. 13:  $^1\text{H}$  NMR of 1f

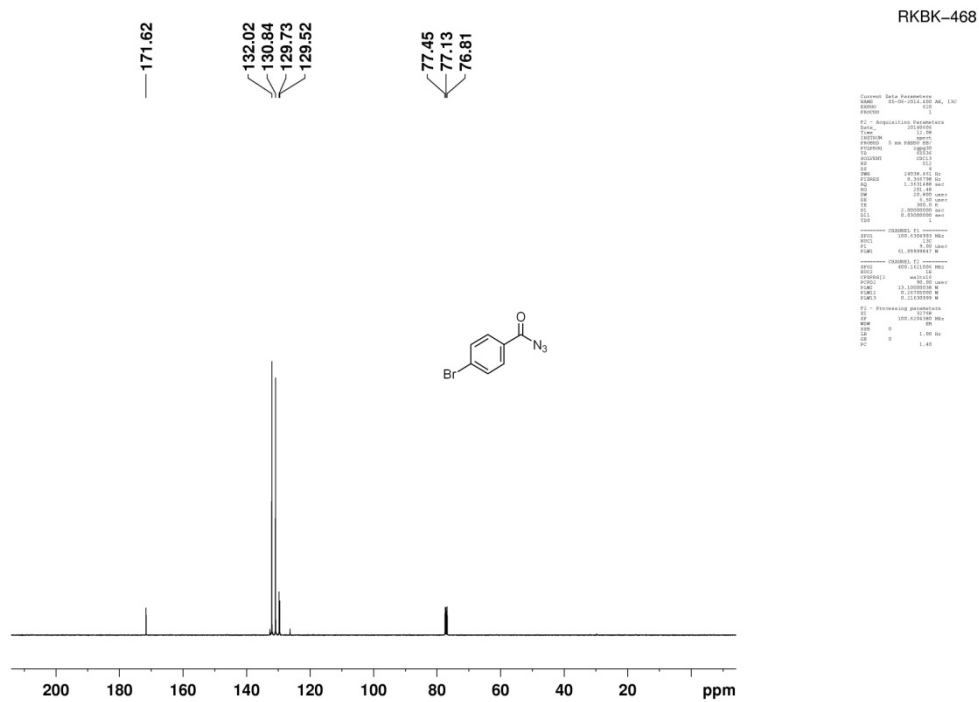

Fig. 14:  $^{13}\text{C}$  NMR of 1f

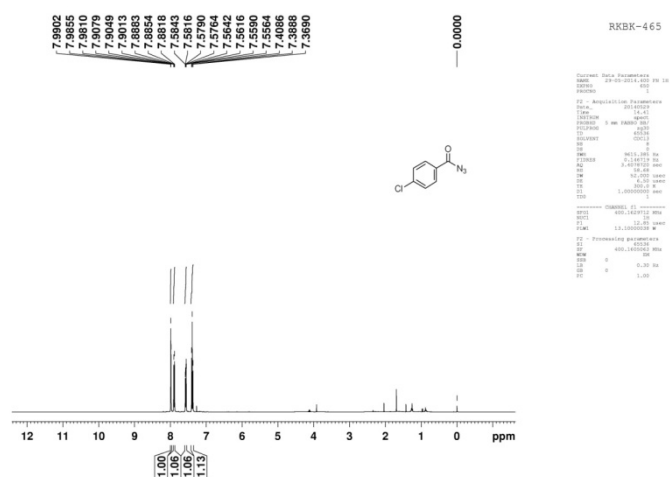

Fig. 15:  $^1\text{H}$  NMR of 1g

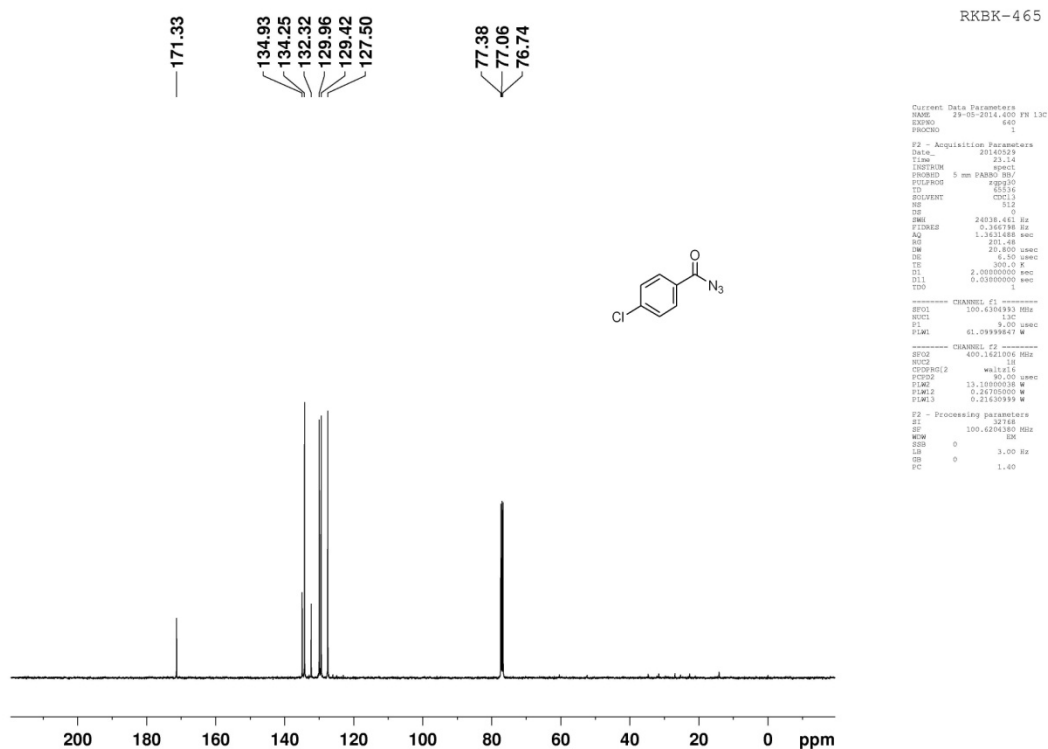

Fig. 16:  $^{13}\text{C}$  NMR of 1g

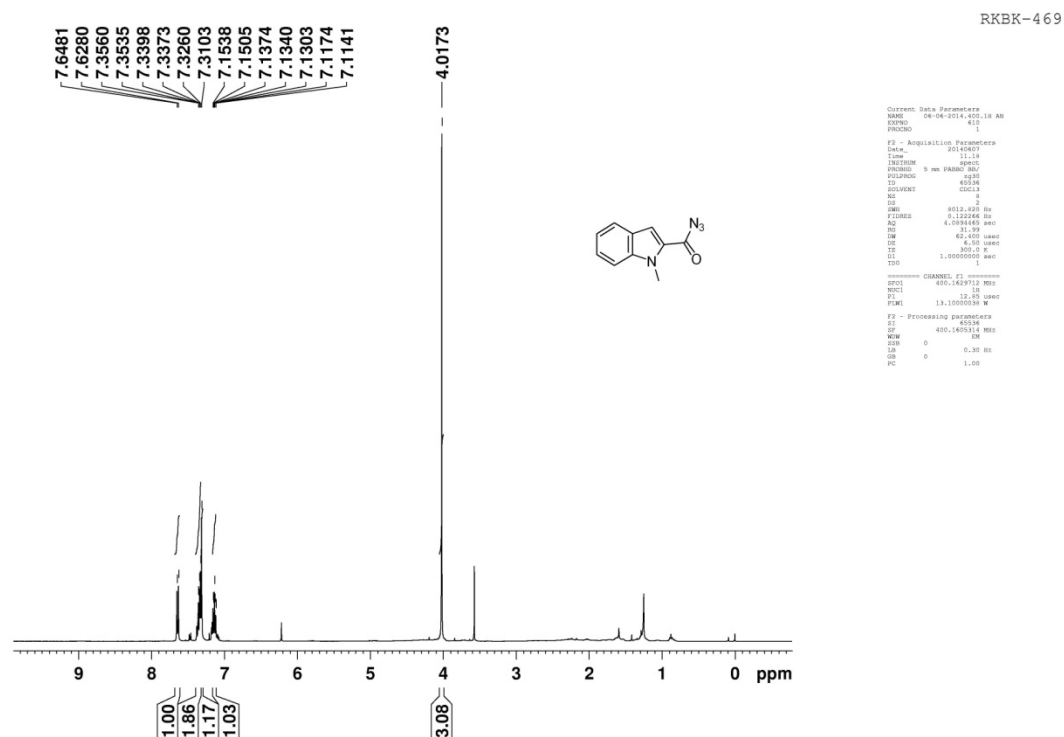

Fig. 17:  $^1\text{H}$  NMR of 1l

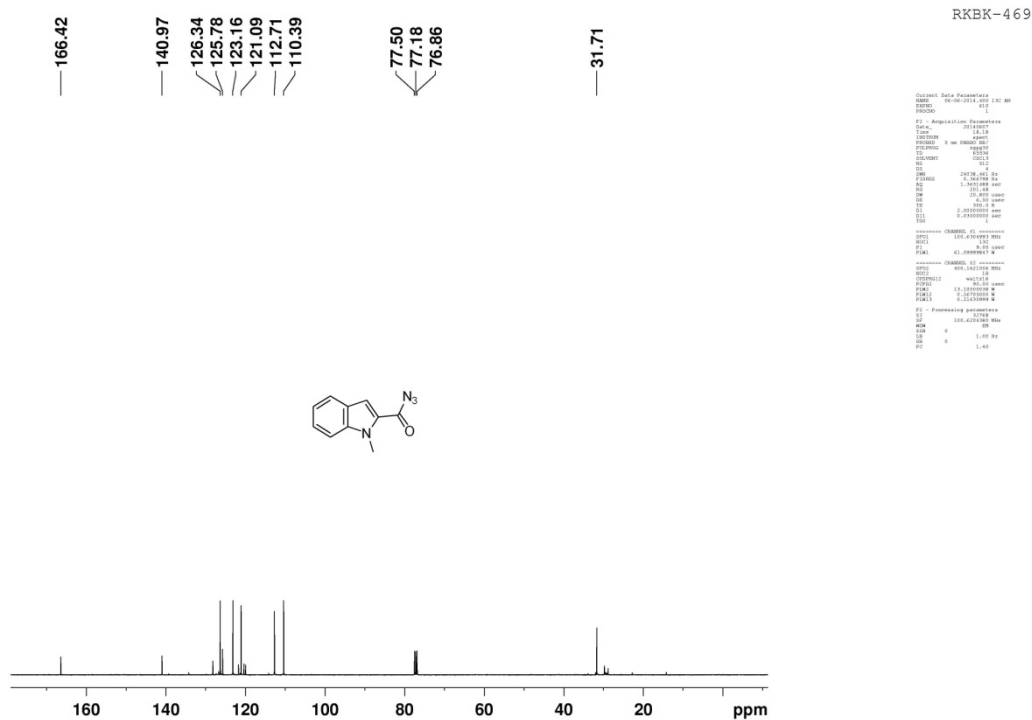

Fig. 18:  $^{13}\text{C}$  NMR of 11

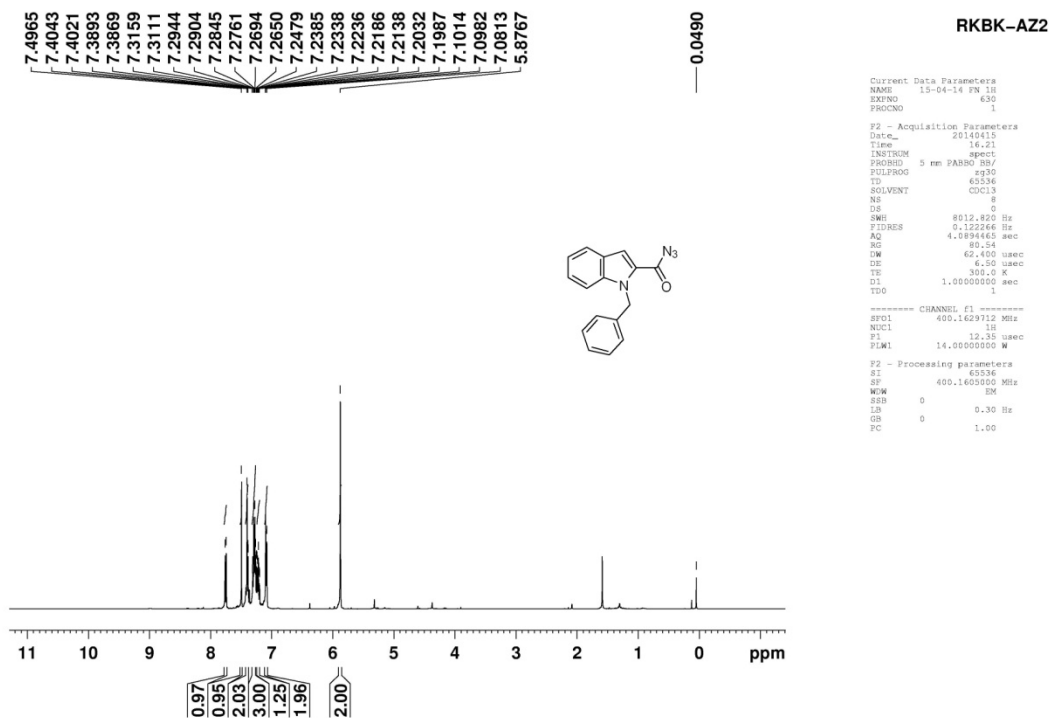

Fig. 19:  $^1\text{H}$  NMR of 1m

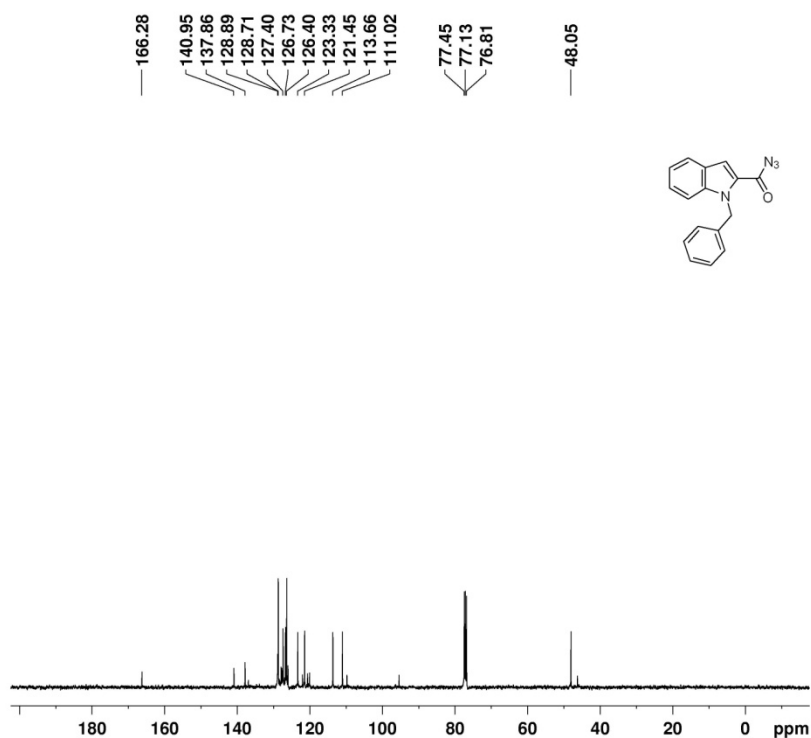

RKBK-A22

```

===== CHANNEL f1 =====
Date_      20120505
Time_      15:15
INSTRUM    spect
PROBHD     5 mm PABBO
PULPROG    zgpg30
TD         65536
SOLVENT    DMSO-d6
NS          8
DS          4
FIDRES     0.111400 Hz
AQ         0.122259 Hz
RG         6.098441 Hz
NUC1        13C
NUC2         1H
DE         2.00 umol
TE         300.2 K
D1         1.00000000 sec
D11         0.00000000 sec
===== CHANNEL f2 =====
Date_      20120505
Time_      15:15
INSTRUM    spect
PROBHD     5 mm PABBO
PULPROG    zgpg30
TD         65536
SOLVENT    DMSO-d6
NS          8
DS          4
FIDRES     0.111400 Hz
AQ         0.122259 Hz
RG         6.098441 Hz
NUC1        13C
NUC2         1H
DE         2.00 umol
TE         300.2 K
D1         1.00000000 sec
D11         0.00000000 sec
=====
  
```

Fig. 20:  $^{13}\text{C}$  NMR of 1m

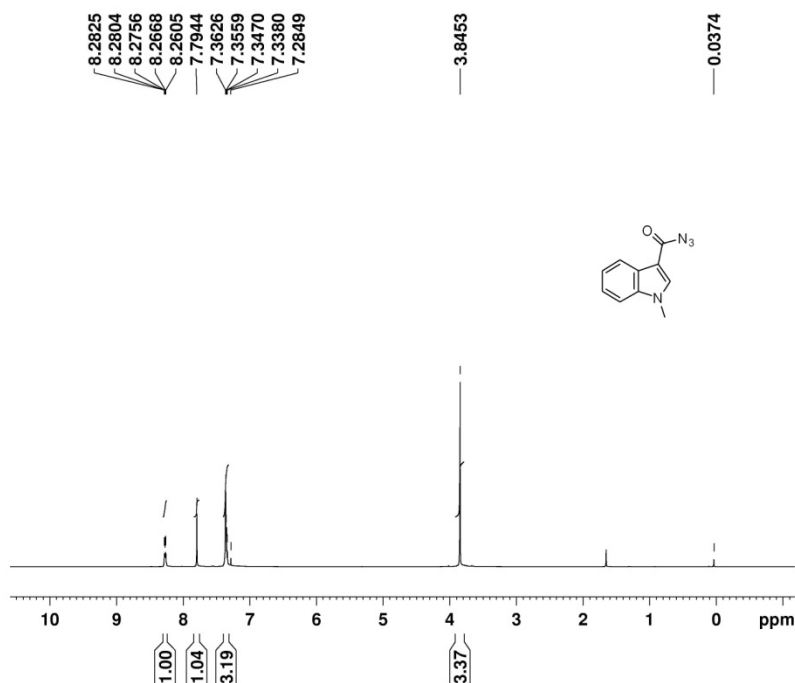

RKBK-AZ

```

===== CHANNEL f1 =====
Date_      20120505
Time_      15:15
INSTRUM    spect
PROBHD     5 mm PABBO
PULPROG    zgpg30
TD         65536
SOLVENT    DMSO-d6
NS          8
DS          4
FIDRES     0.111400 Hz
AQ         0.122259 Hz
RG         6.098441 Hz
NUC1        13C
NUC2         1H
DE         2.00 umol
TE         300.2 K
D1         1.00000000 sec
D11         0.00000000 sec
===== CHANNEL f2 =====
Date_      20120505
Time_      15:15
INSTRUM    spect
PROBHD     5 mm PABBO
PULPROG    zgpg30
TD         65536
SOLVENT    DMSO-d6
NS          8
DS          4
FIDRES     0.111400 Hz
AQ         0.122259 Hz
RG         6.098441 Hz
NUC1        13C
NUC2         1H
DE         2.00 umol
TE         300.2 K
D1         1.00000000 sec
D11         0.00000000 sec
=====
  
```

Fig. 21:  $^1\text{H}$  NMR of 1n

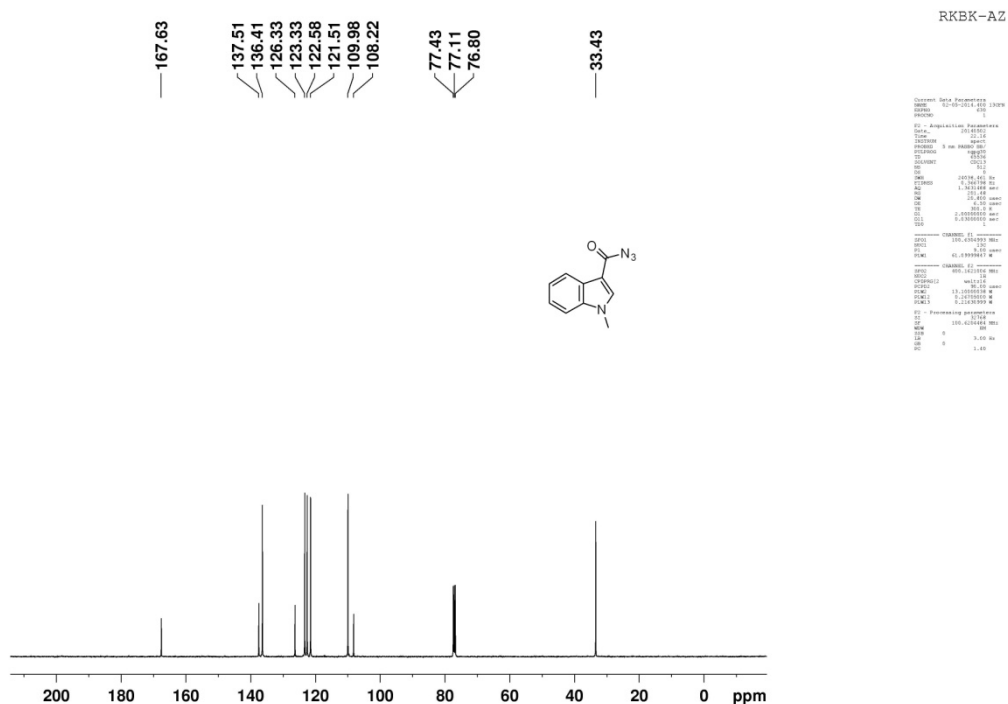

Fig. 22:  $^{13}\text{C}$  NMR of 1n

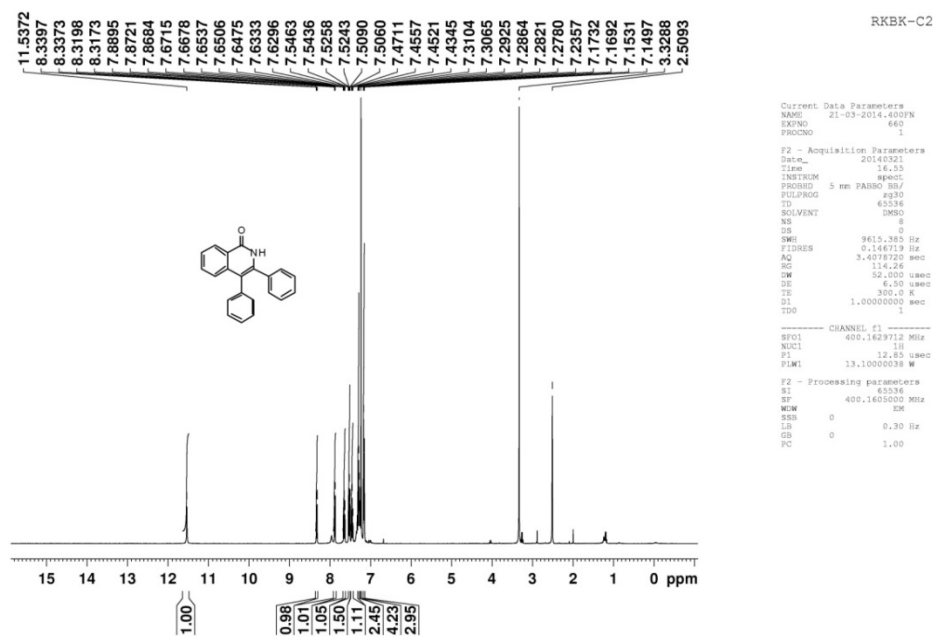

Fig. 23:  $^1\text{H}$  NMR of 4aa

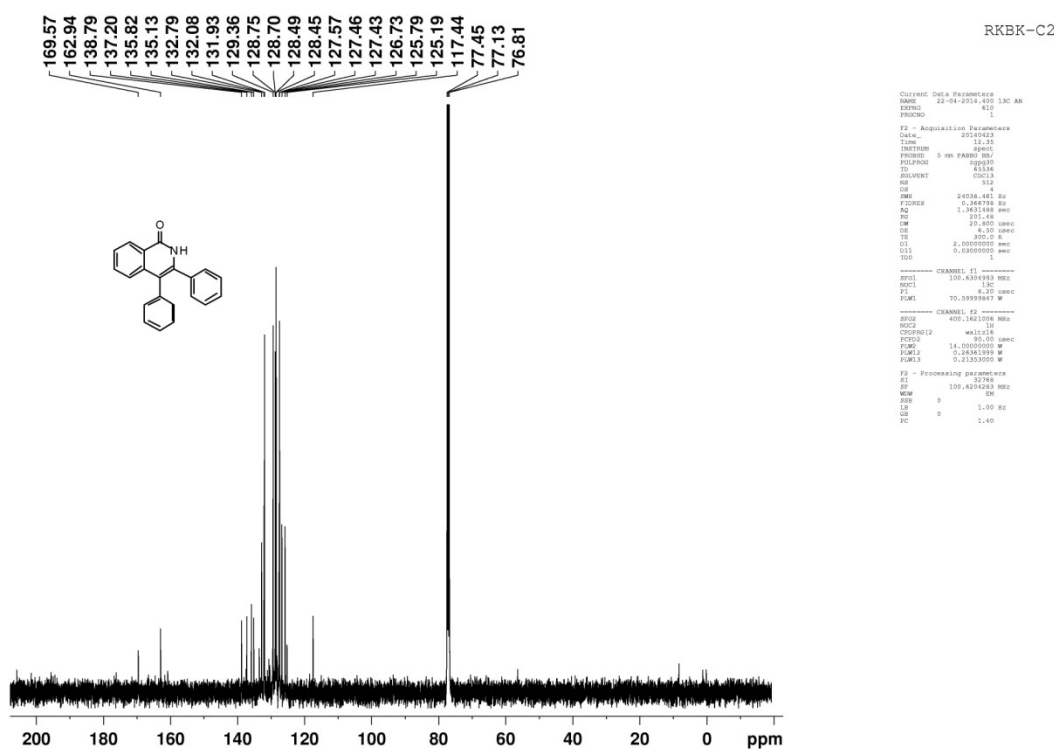

Fig. 24:  $^{13}\text{C}$  NMR of 4aa

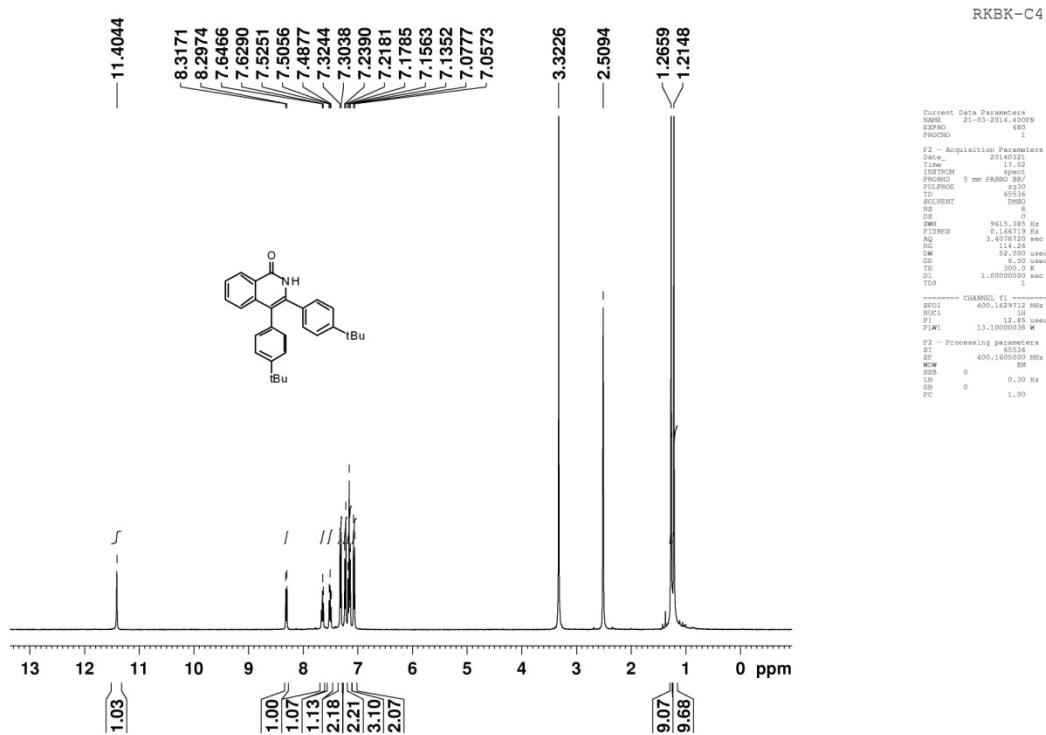

Fig. 25:  $^1\text{H}$  NMR of 4ad

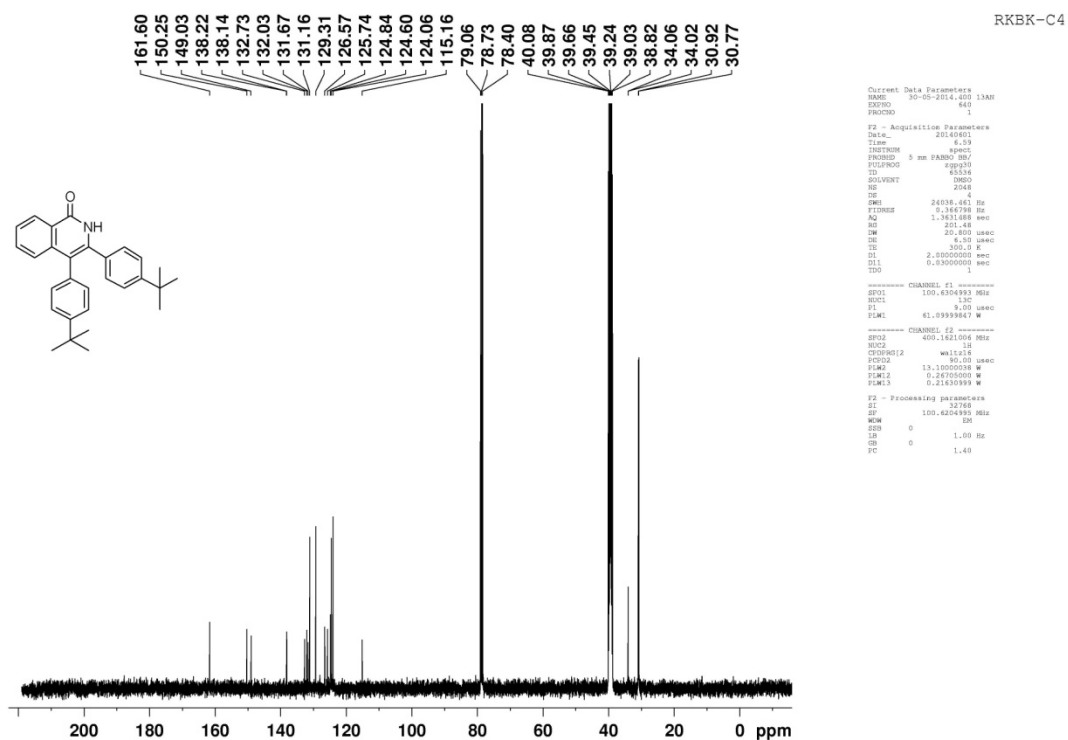

Fig. 26:  $^{13}\text{C}$  NMR of 4ad

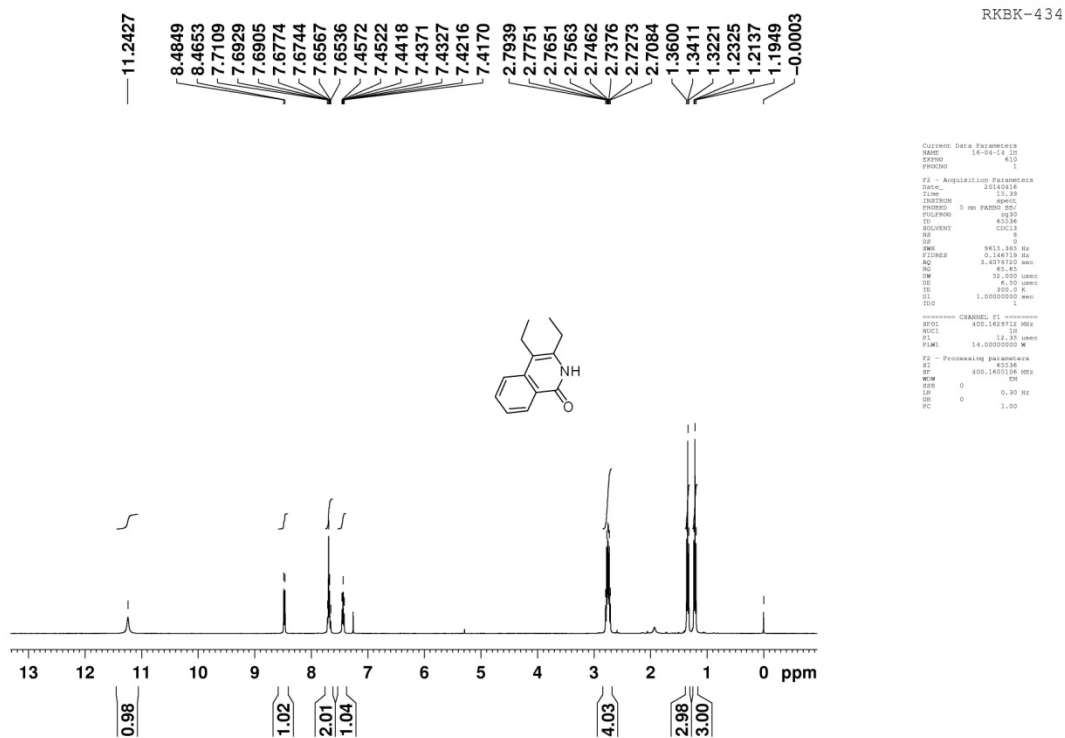

Fig. 27:  $^1\text{H}$  NMR of 4ae

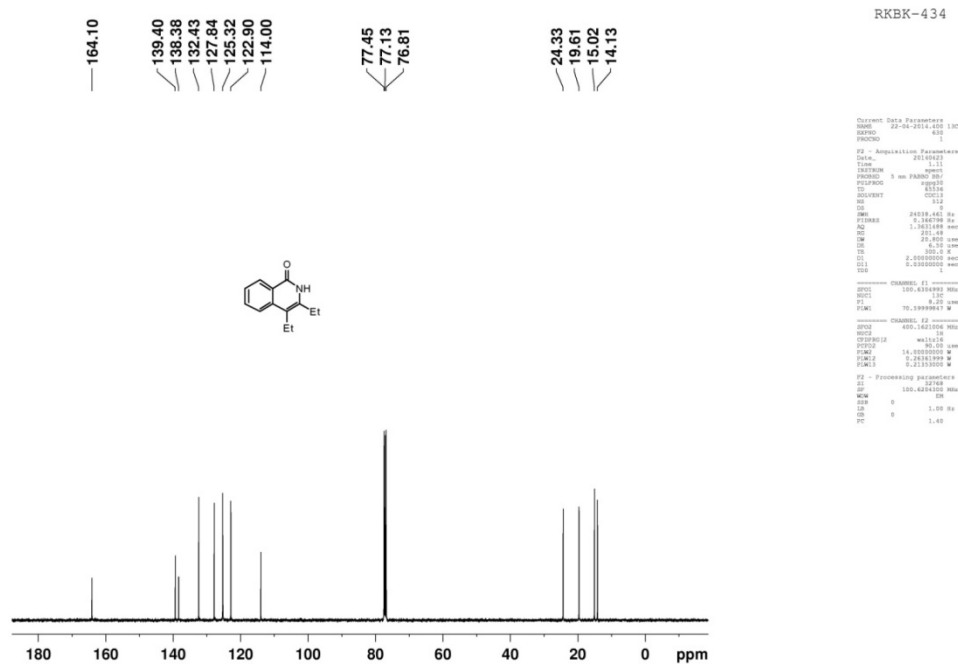

Fig. 28:  $^{13}\text{C}$  NMR of 4ae

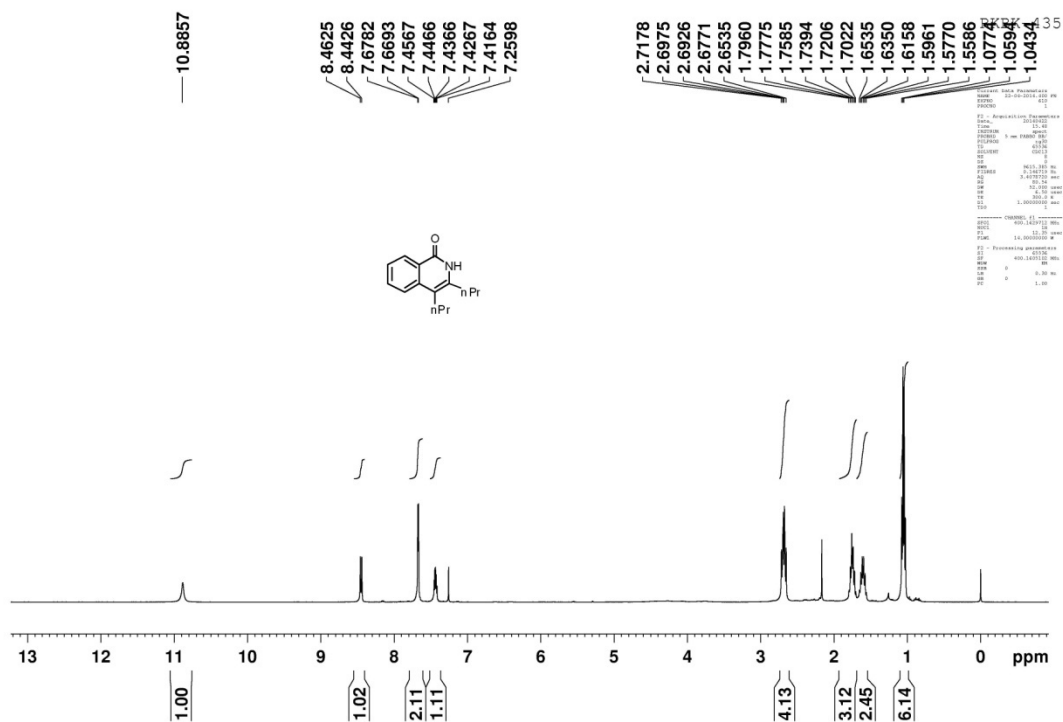

Fig. 29:  $^1\text{H}$  NMR of 4af

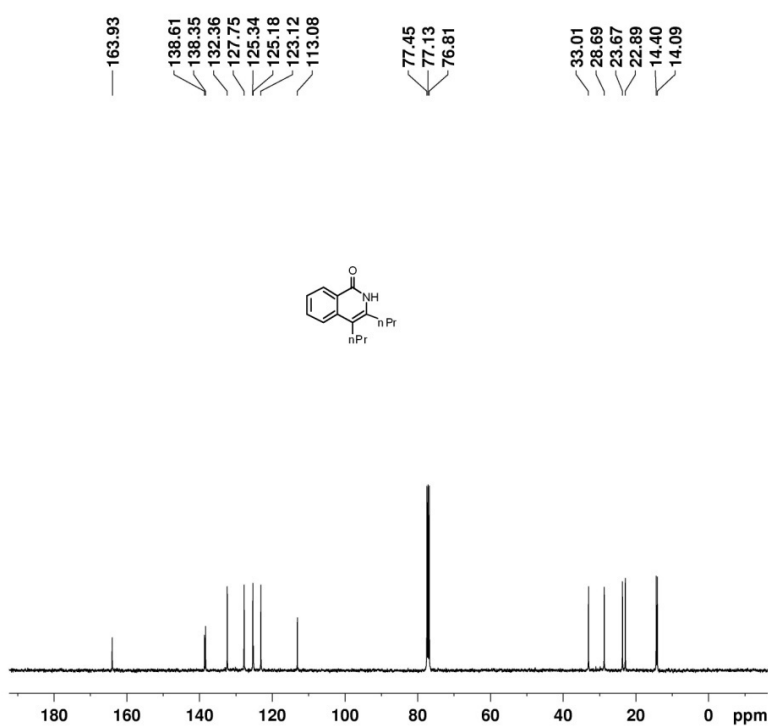

RKBK-435

```

Current Data Parameters
NAME      24-04-2014-400 13C FW
EXPNO     630
PROCNO    1

F2 - Acquisition Parameters
Date_     20140422
Time      16.00
INSTRUM   spect
PROBHD    5 mm PABBO 501
PULPROG   zgpg30
TD        65536
SOLVENT   CDCl3
NS         8
DS         0
SWH        9615.385 Hz
FIDRES     0.148719 Hz
AQ         3.4078720 sec
RG         100.41
DW         52.000 usec
DE         6.50 usec
TE         300.0 K
D1         1.00000000 sec
TDO        1

===== CHANNEL f1 =====
SFO1      100.626120 MHz
NUC1      13C
P1         12.00 usec
PL1        0.00 dB
===== CHANNEL f2 =====
SFO2      400.146200 MHz
NUC2      1H
P2         12.00 usec
PL2        0.00 dB

F2 - Processing parameters
SI         32768
SF         400.146200 MHz
WDW        EM
SSB         0
LB          0.30 Hz
GB          0
PC          1.00
  
```

Fig. 30:  $^{13}\text{C}$  NMR of 4af

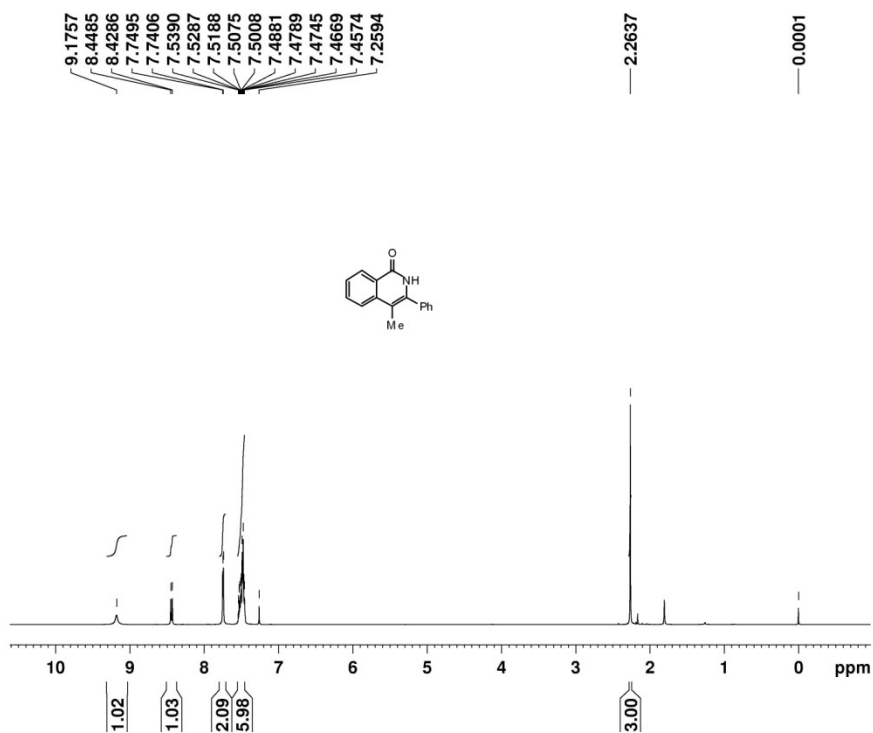

RKBK-437

```

Current Data Parameters
NAME      22-04-2014.400 FW
EXPNO     630
PROCNO    1

F2 - Acquisition Parameters
Date_     20140422
Time      16.00
INSTRUM   spect
PROBHD    5 mm PABBO 501
PULPROG   zgpg30
TD        65536
SOLVENT   CDCl3
NS         8
DS         0
SWH        9615.385 Hz
FIDRES     0.148719 Hz
AQ         3.4078720 sec
RG         100.41
DW         52.000 usec
DE         6.50 usec
TE         300.0 K
D1         1.00000000 sec
TDO        1

===== CHANNEL f1 =====
SFO1      400.1629712 MHz
NUC1      1H
P1         12.35 usec
PL1        0.00 dB
===== CHANNEL f2 =====
SFO2      100.626120 MHz
NUC2      13C
P2         12.00 usec
PL2        0.00 dB

F2 - Processing parameters
SI         32768
SF         400.1629712 MHz
WDW        EM
SSB         0
LB          0.30 Hz
GB          0
PC          1.00
  
```

Fig. 31:  $^1\text{H}$  NMR of 4ag

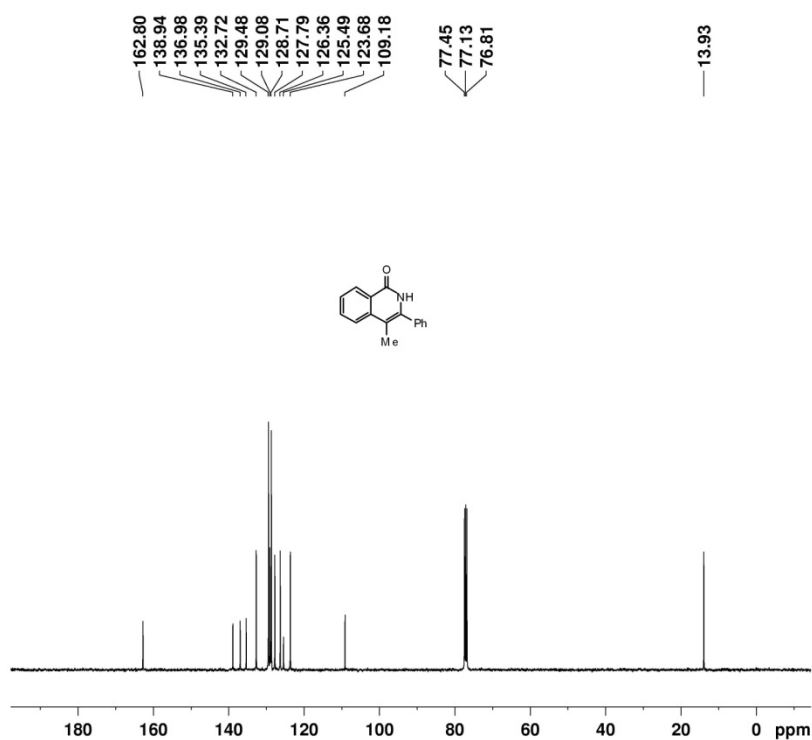

Fig. 32: <sup>13</sup>C NMR of 4ag

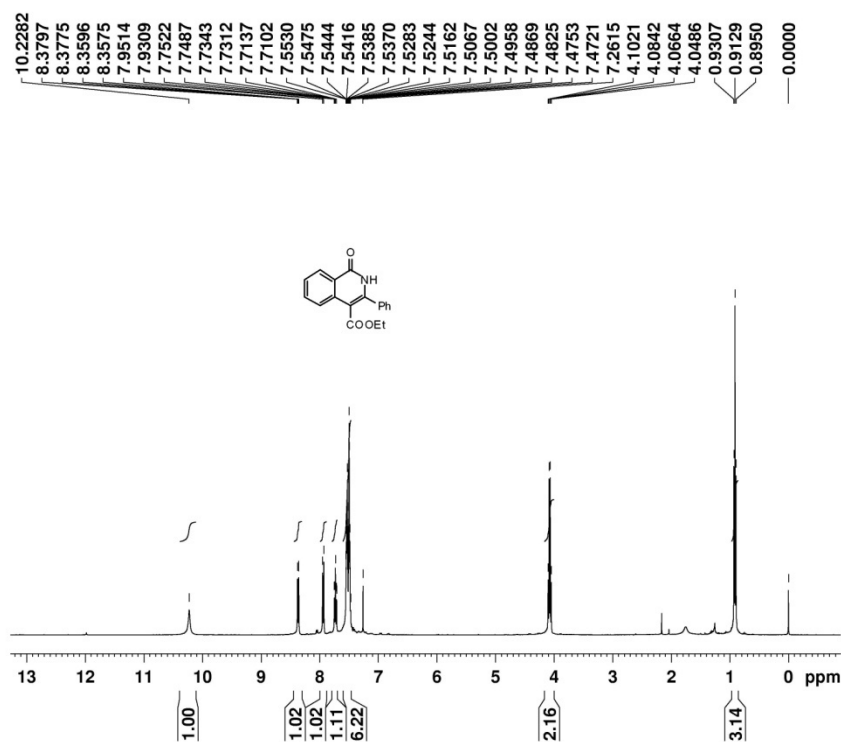

Fig. 33: <sup>1</sup>H NMR of 4ah

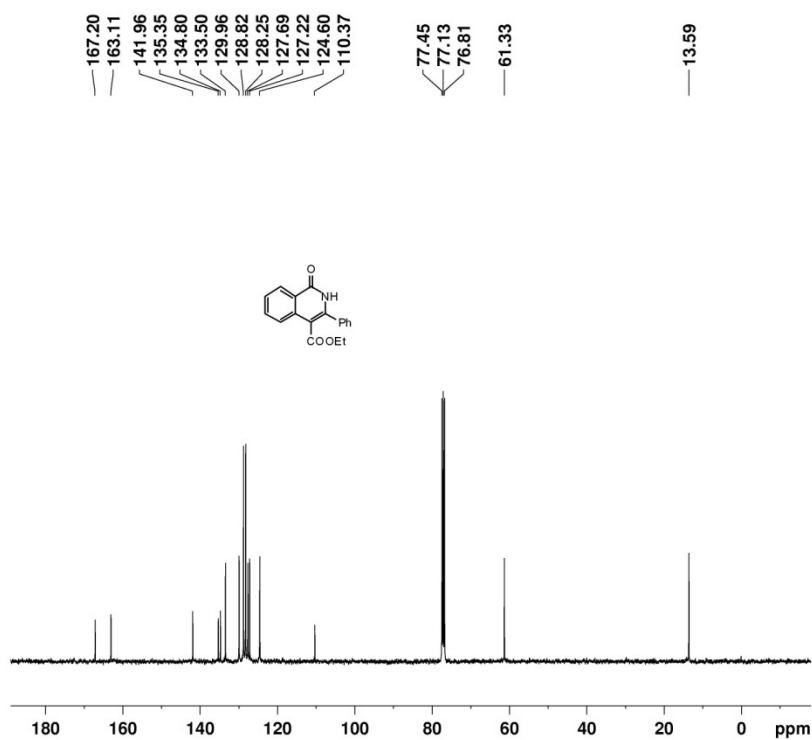

Fig. 34: <sup>13</sup>C NMR of 4ah

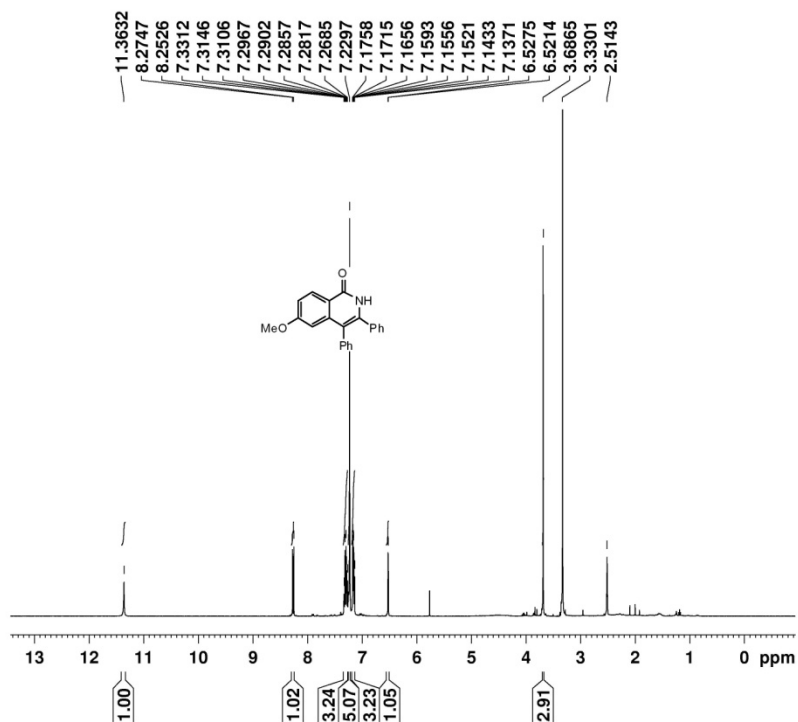

Fig. 35: <sup>1</sup>H NMR of 4ba

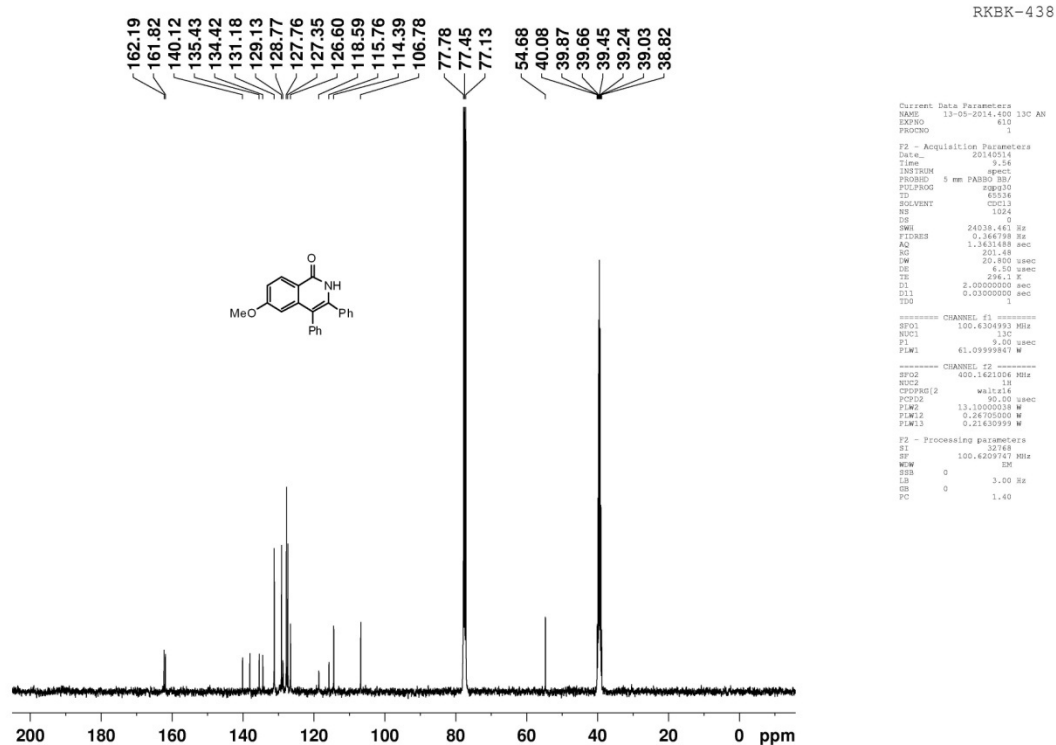

Fig. 36:  $^{13}\text{C}$  NMR of 4ba

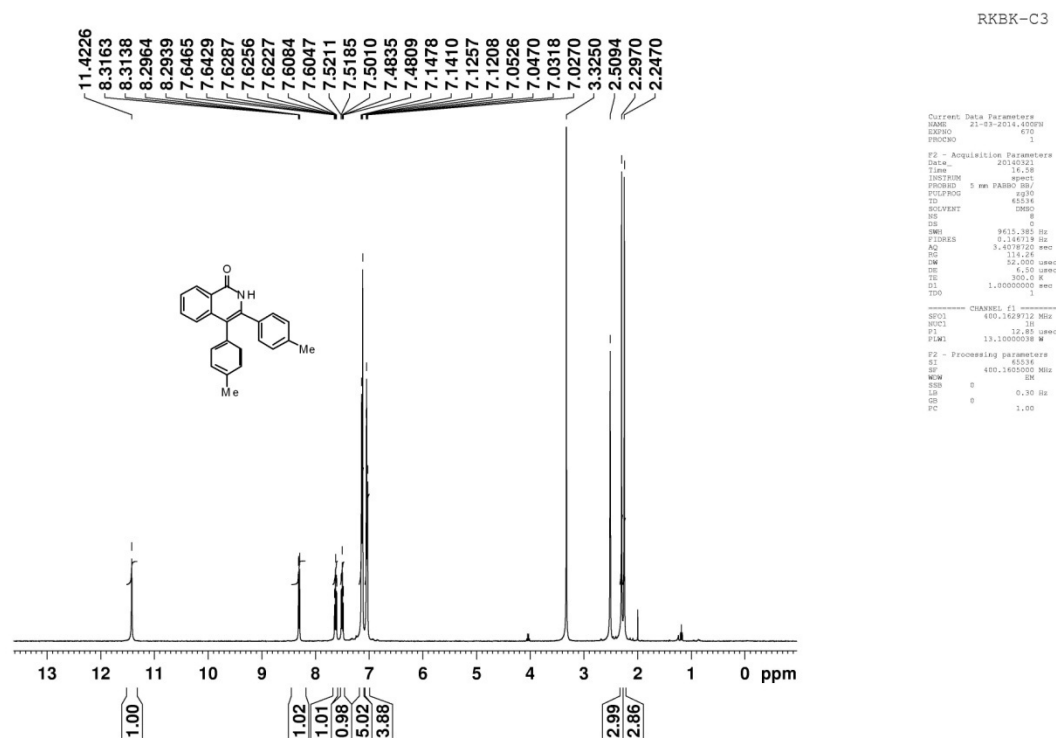

Fig. 37:  $^1\text{H}$  NMR of 4ab

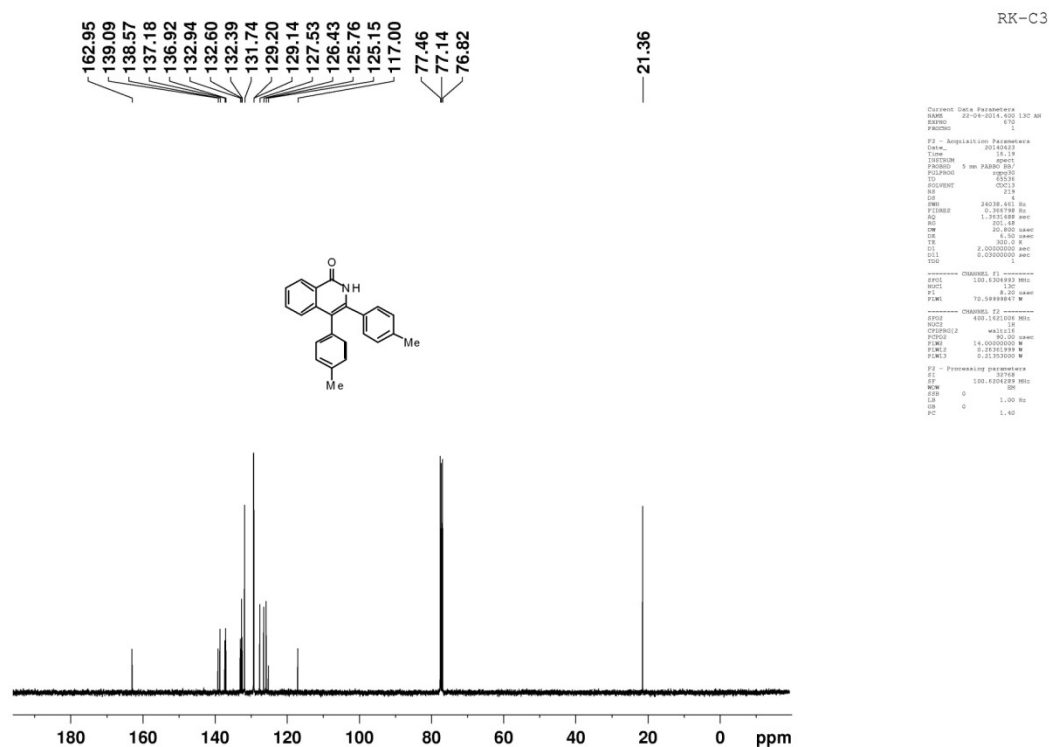

Fig. 38:  $^{13}\text{C}$  NMR of 4ab

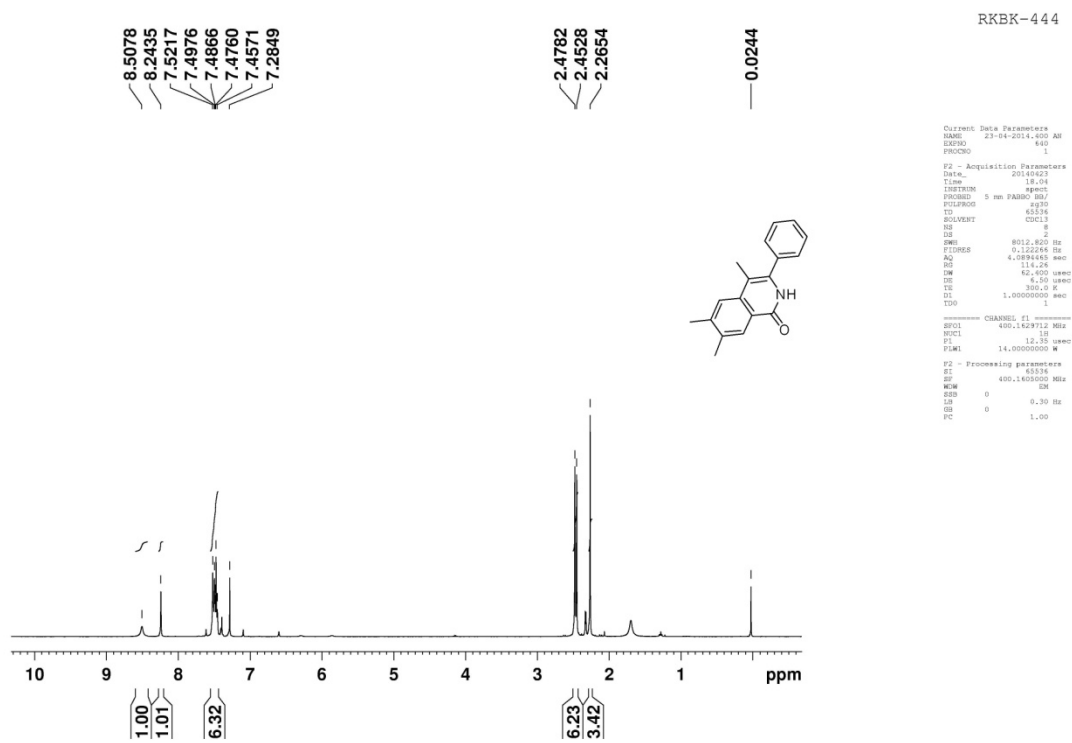

Fig. 39:  $^1\text{H}$  NMR of 4bg

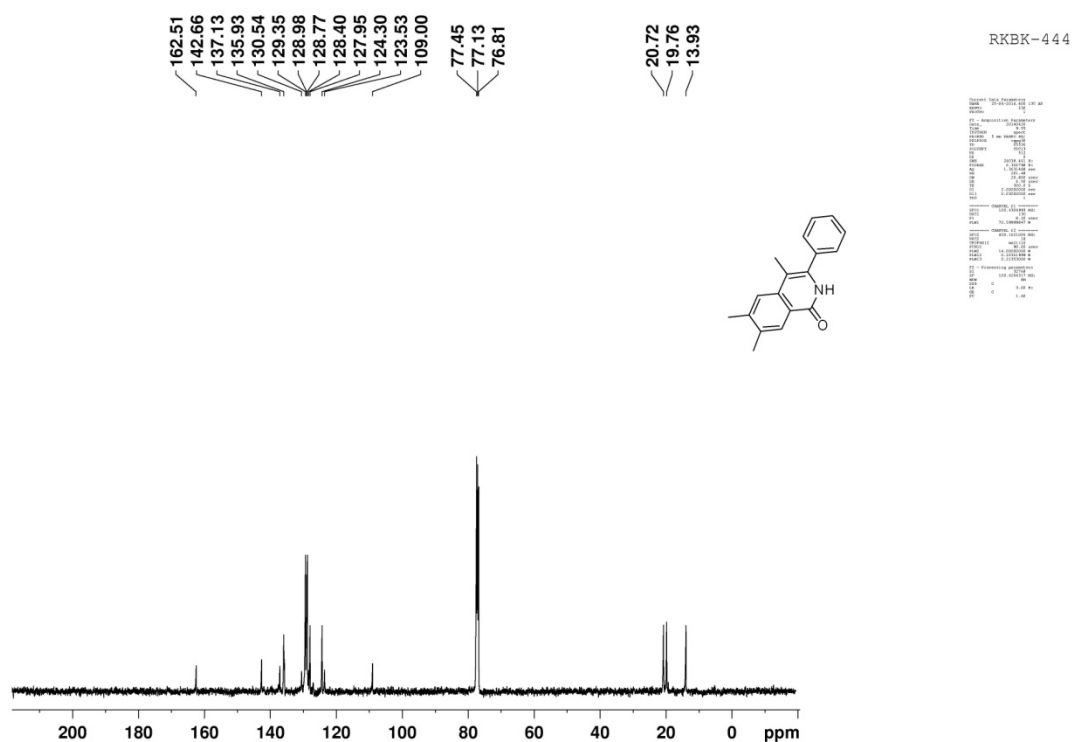

Fig. 40: <sup>13</sup>C NMR of 4bg

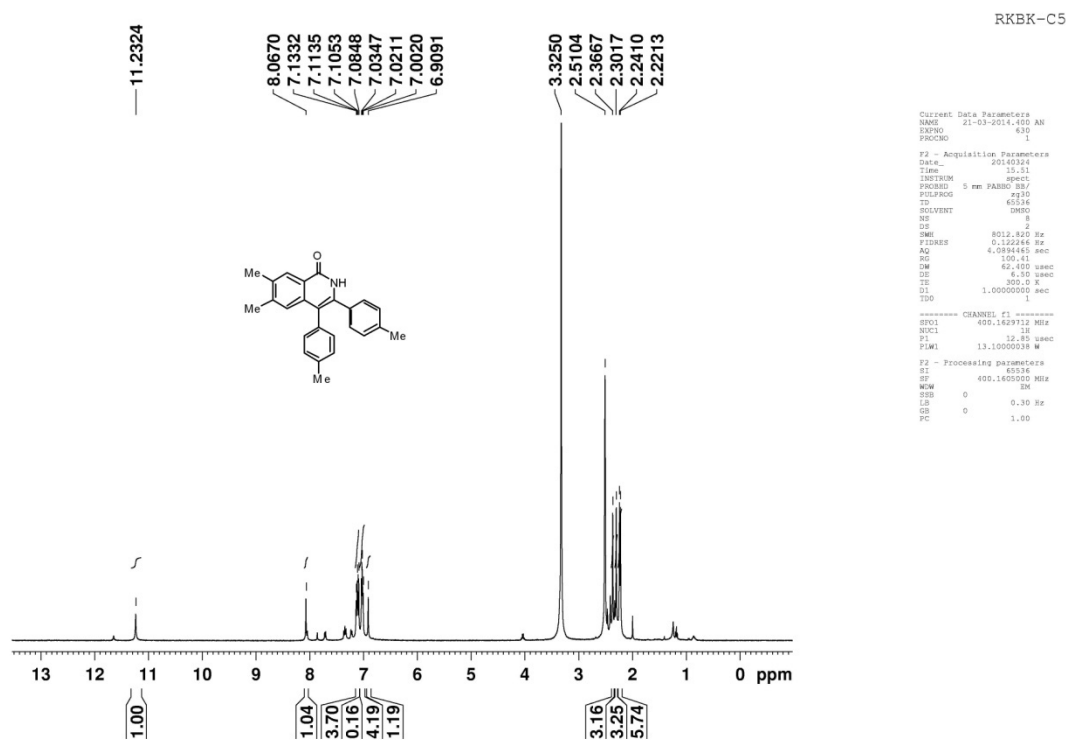

Fig. 41: <sup>1</sup>H NMR of 4cb

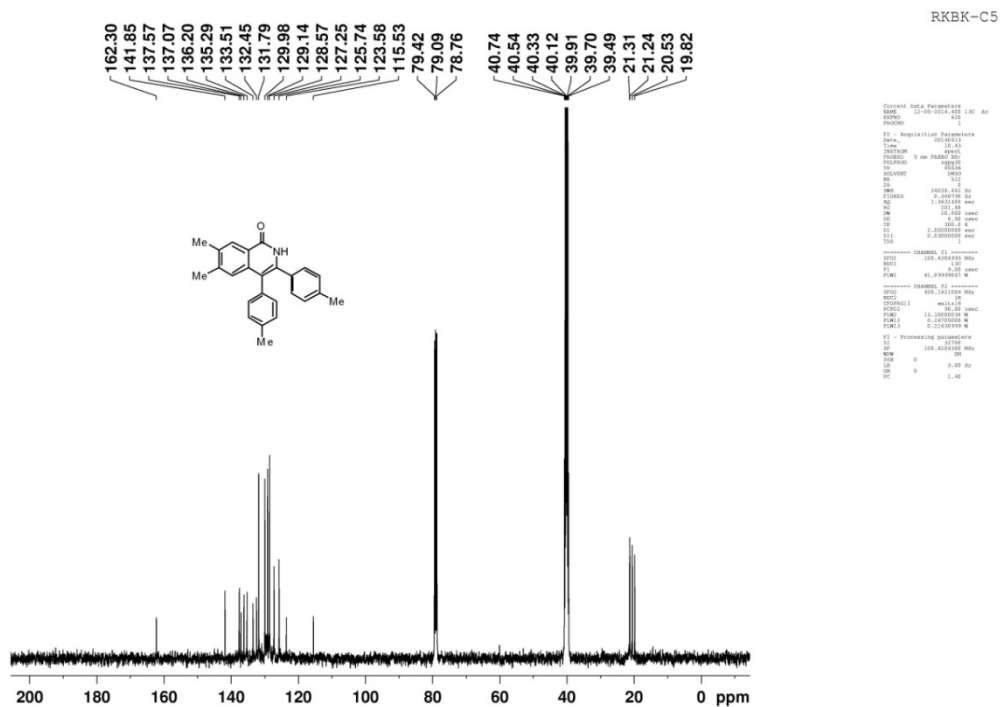

Fig. 42: <sup>13</sup>C NMR of 4cb

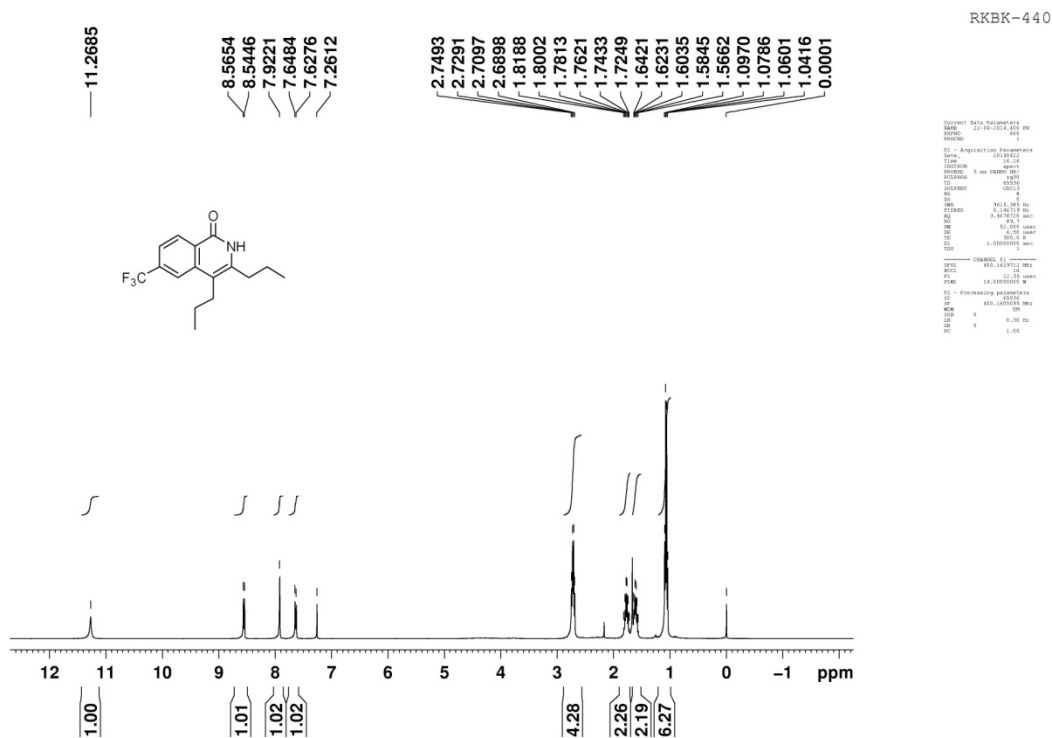

Fig. 43: <sup>1</sup>H NMR of 4cf

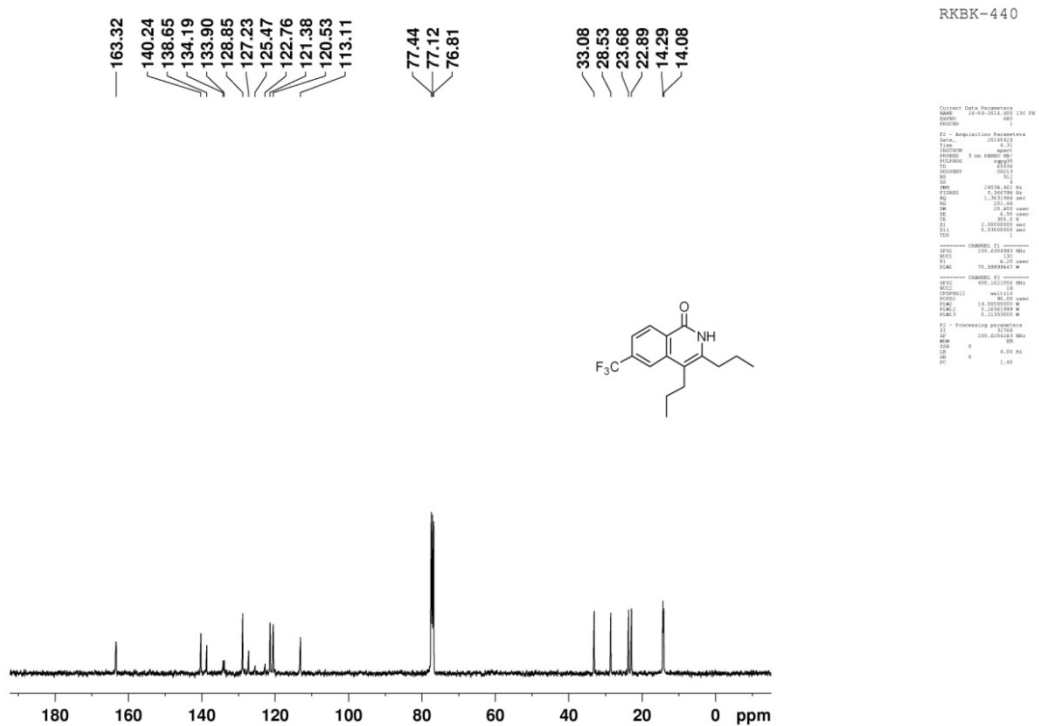

Fig. 44:  $^{13}\text{C}$  NMR of 4cf

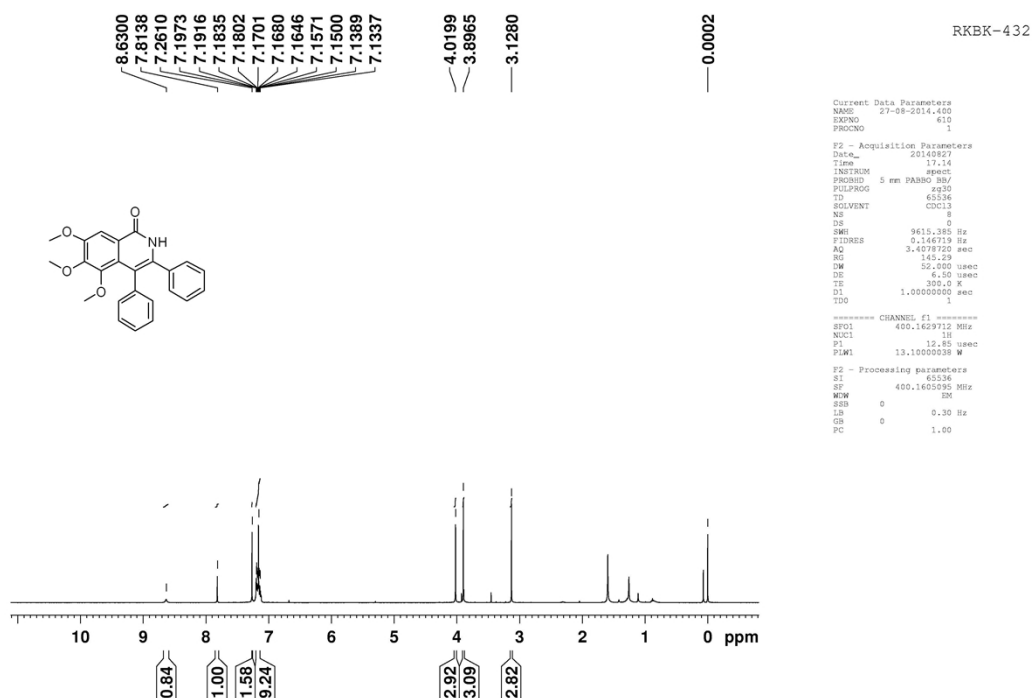

Fig. 45:  $^1\text{H}$  NMR of 4da

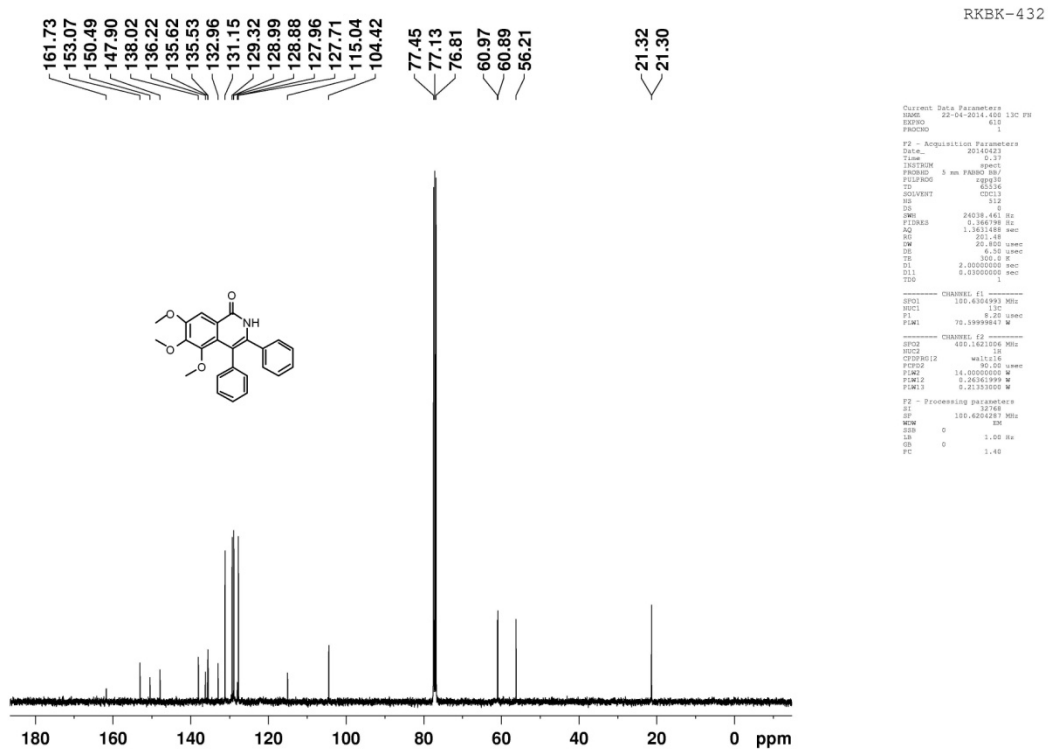

Fig. 46:  $^{13}\text{C}$  NMR of 4da

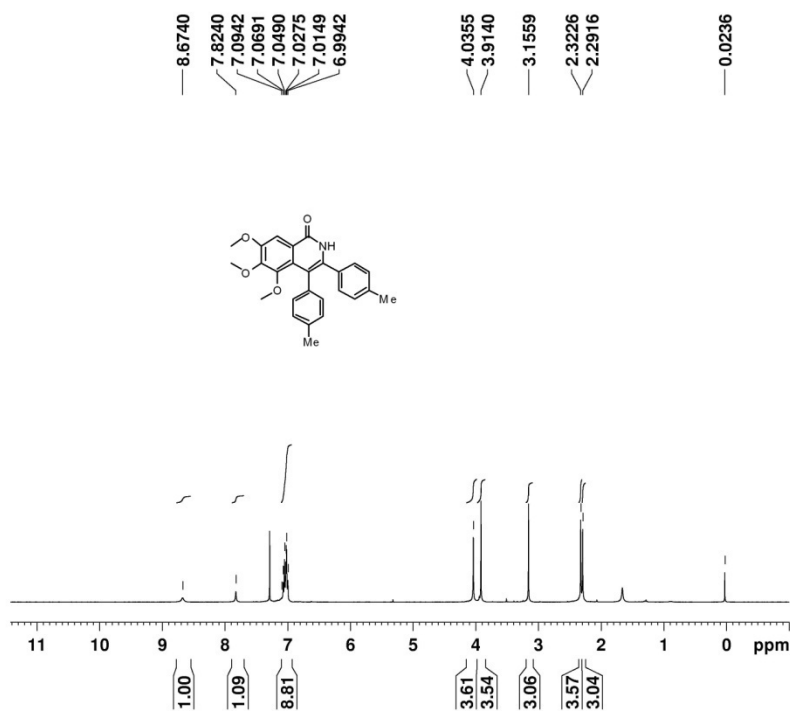

Fig. 47: <sup>1</sup>H NMR of 4db

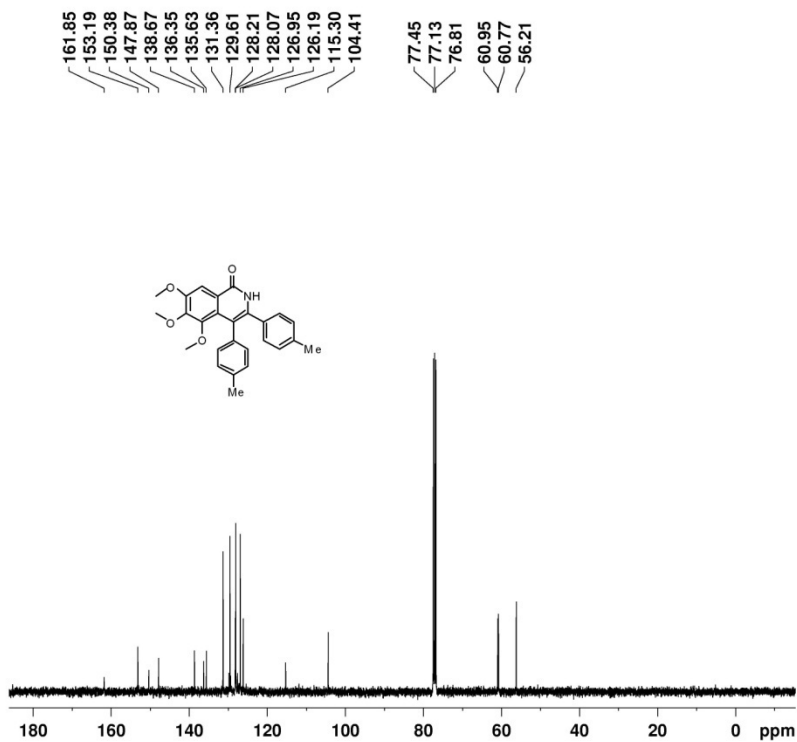

Fig. 48: <sup>13</sup>C NMR of 4db

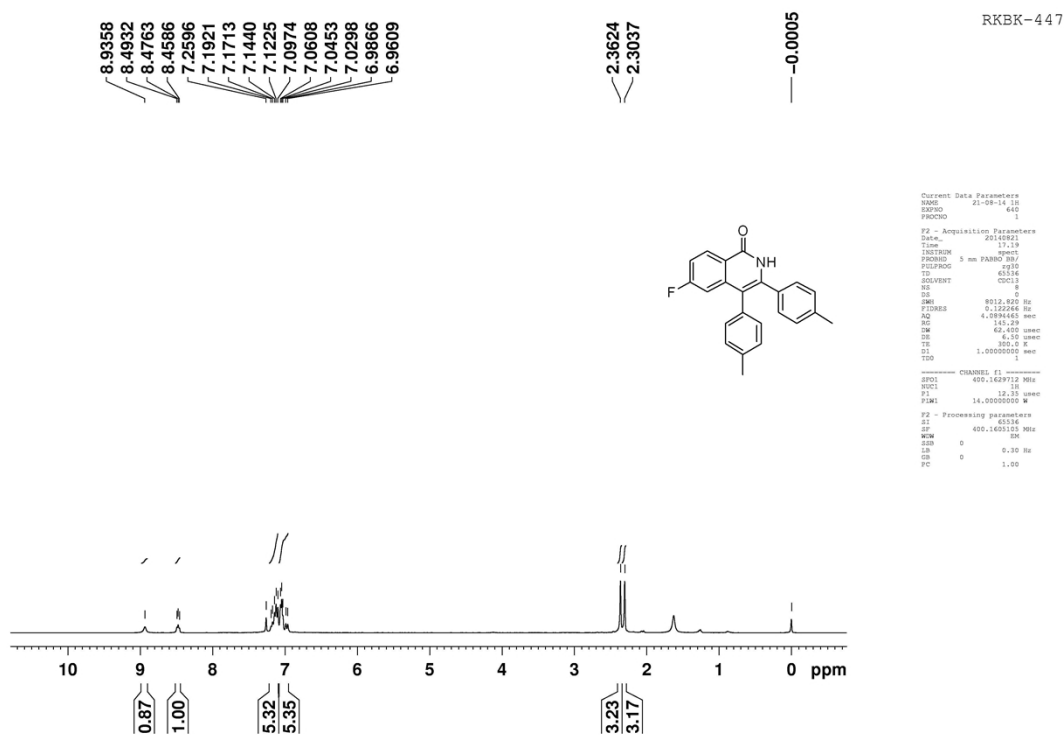

Fig. 49: <sup>1</sup>H NMR of 4eb

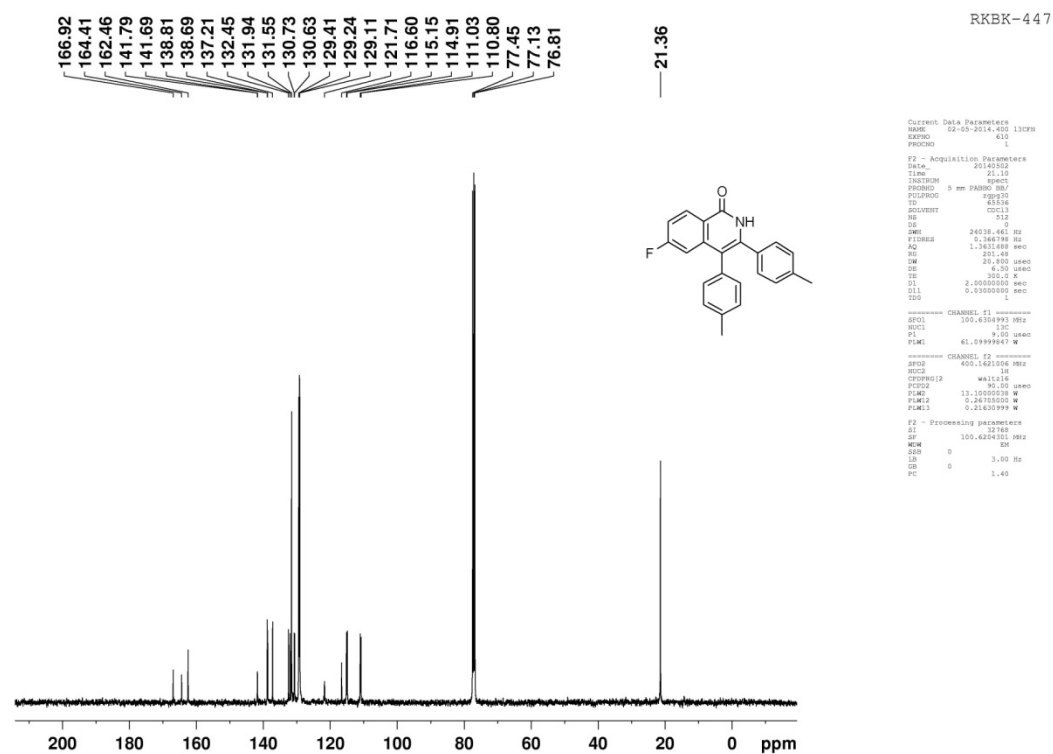

Fig. 50: <sup>13</sup>C NMR of 4eb

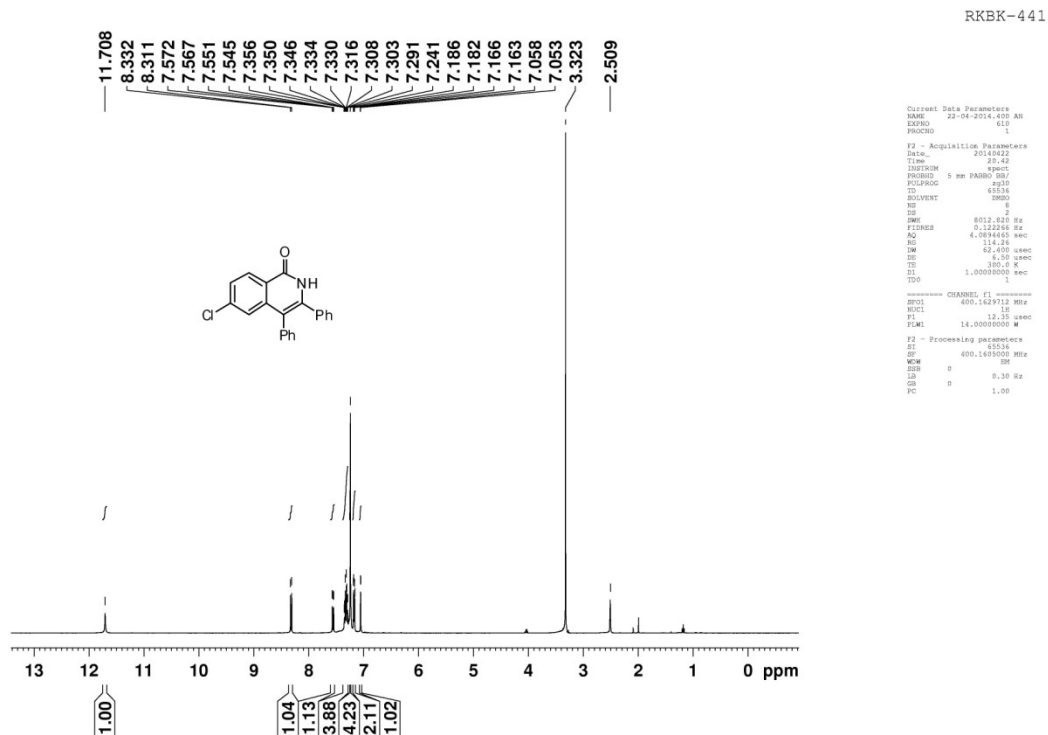

Fig. 51:  $^1\text{H}$  NMR of 4fa

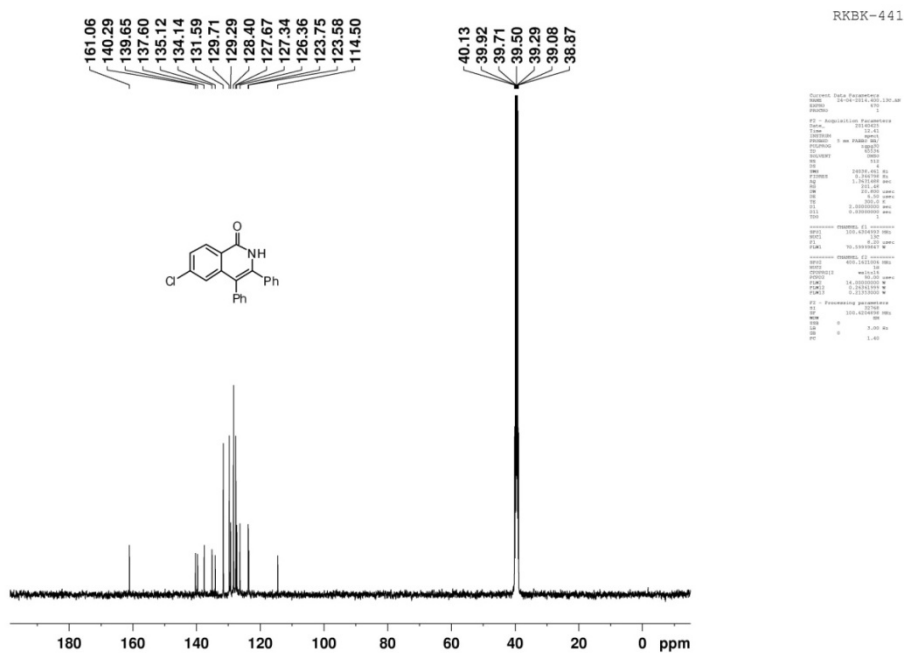

Fig. 52:  $^{13}\text{C}$  NMR of 4fa

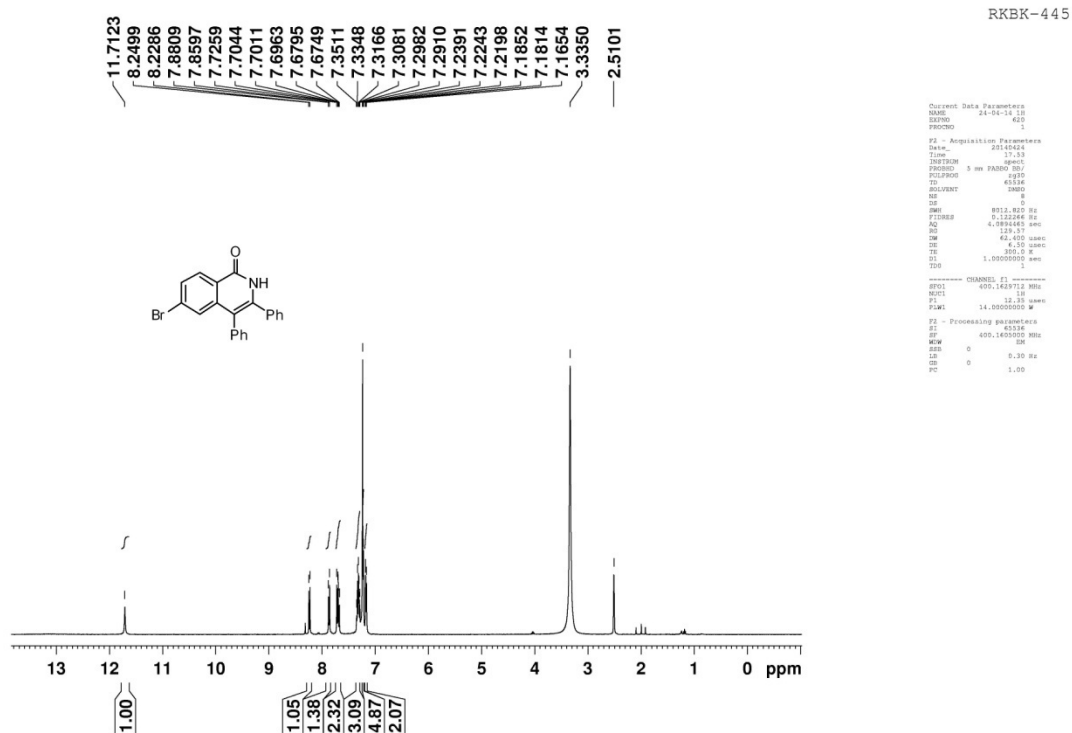

Fig. 53:  $^1\text{H}$  NMR of 4ga

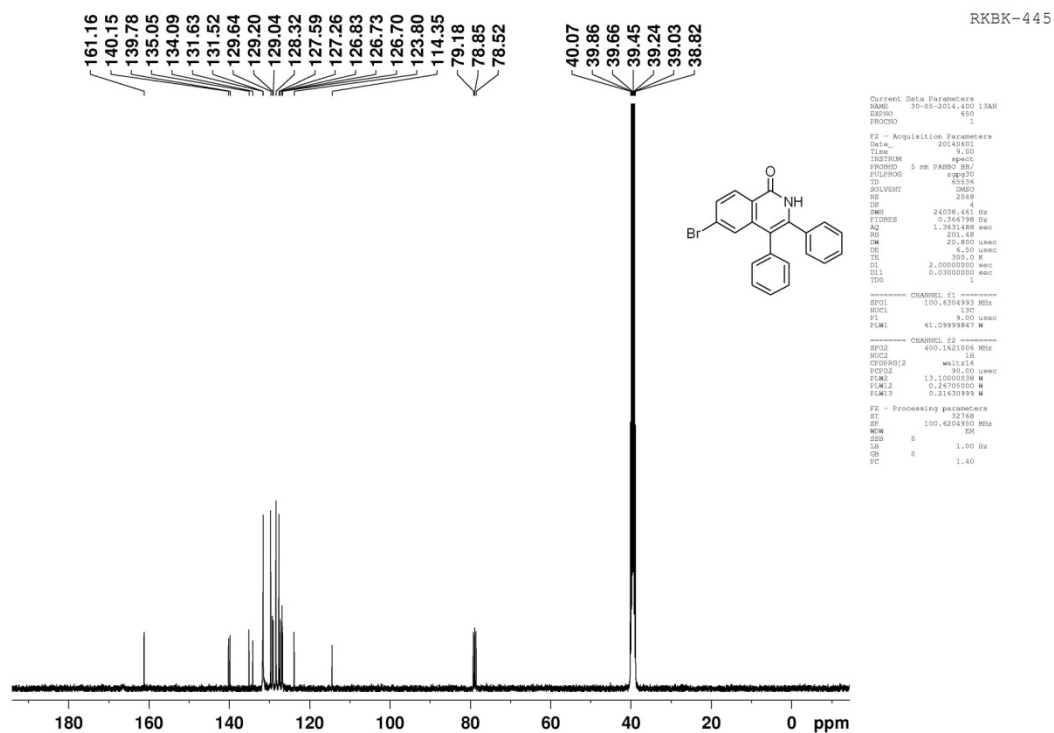

Fig. 54:  $^{13}\text{C}$  NMR of 4ga

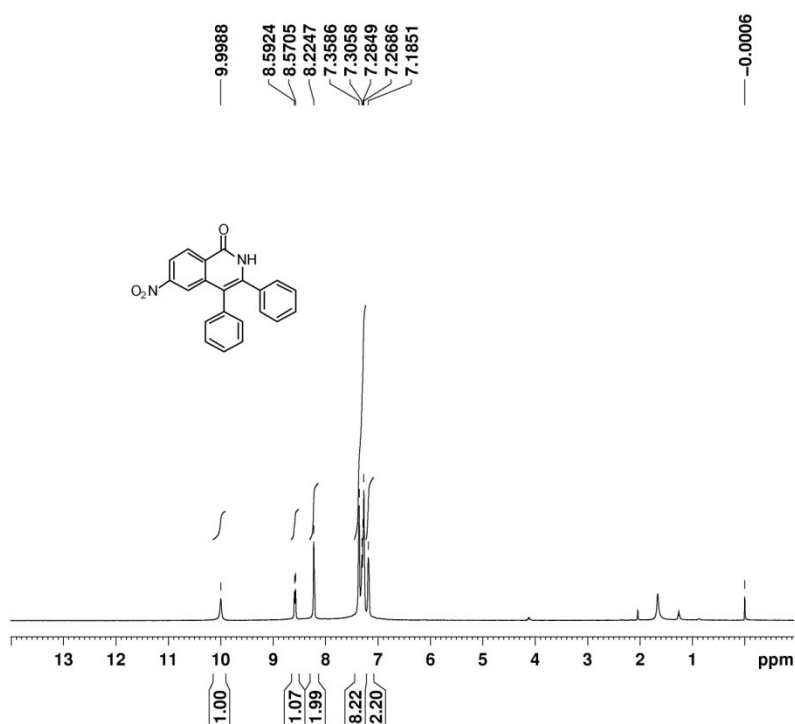

Fig. 55: <sup>1</sup>H NMR of 4ha

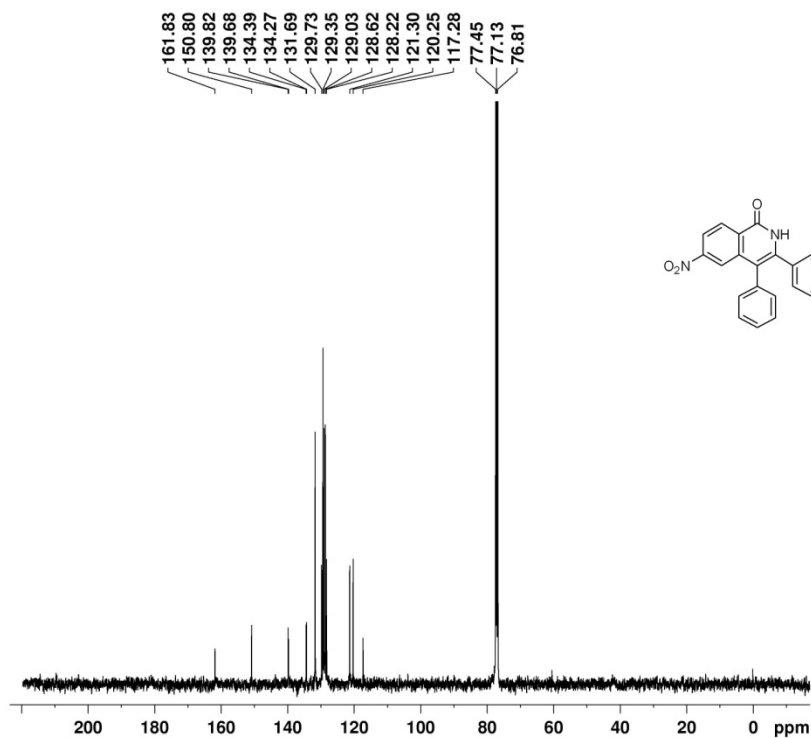

Fig. 56: <sup>13</sup>C NMR of 4ha

RKBK-448

Current Data Parameters  
NAME 23-04-14 10  
EXPNO 650  
PROCNO 1

F2 - Acquisition Parameters  
Date\_ 20140429  
Time 16.27  
INSTRUM spect  
PROBHD 5 mm PABBO 8H/  
PULPROG zg30  
TD 65536  
SOLVENT CDCl3  
NS 8  
DS 0  
SWH 8012.820 Hz  
FIDRES 0.122344 Hz  
AQ 4.0894465 sec  
RG 129.57  
DM 62.400 usec  
DE 6.50 usec  
TE 300.0 K  
D1 1.0000000 sec  
TOD 1

===== CHANNEL f1 =====  
SFO1 400.1629712 MHz  
NUC1 1H  
P1 12.35 usec  
PLW1 14.0000000 W

F2 - Processing parameters  
SI 65536  
SF 400.1605997 MHz  
WDW EM  
SSB 0  
GB 0  
PC 1.00

RKBK-448

Current Data Parameters  
NAME 02-05-2014\_400 13CPS  
EXPNO 600  
PROCNO 1

F2 - Acquisition Parameters  
Date\_ 20140502  
Time 21.44  
INSTRUM spect  
PROBHD 5 mm PABBO 8H/  
PULPROG zgpg30  
TD 65536  
SOLVENT CDCl3  
NS 8  
DS 0  
SWH 24038.461 Hz  
FIDRES 0.144788 Hz  
AQ 1.362168 sec  
RG 280.48  
DM 20.800 usec  
DE 1.50 usec  
TE 300.0 K  
D11 0.0300000 sec  
D11 0.0300000 sec  
TOD 1

===== CHANNEL f1 =====  
SFO1 100.6304992 MHz  
NUC1 13C  
P1 0.05 usec  
PLW1 0.1000000 W

===== CHANNEL f2 =====  
SFO2 400.1421015 MHz  
NUC2 1H  
CPDPRG2 waltz16  
PCPD2 90.00 usec  
P1W2 13.1000000 W  
P1W12 0.2610000 W  
P1W13 0.2163999 W

F2 - Processing parameters  
SI 32768  
SF 100.6294272 MHz  
WDW EM  
SSB 0  
GB 0  
PC 1.40

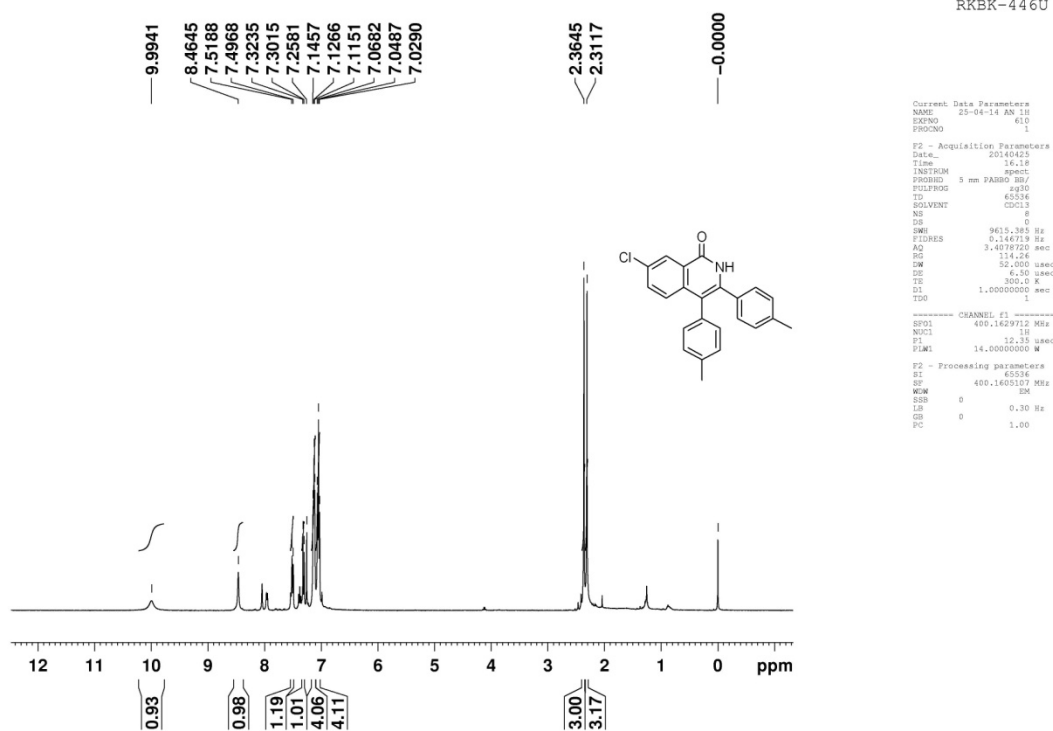

Fig. 57:  $^1\text{H}$  NMR of 4ha

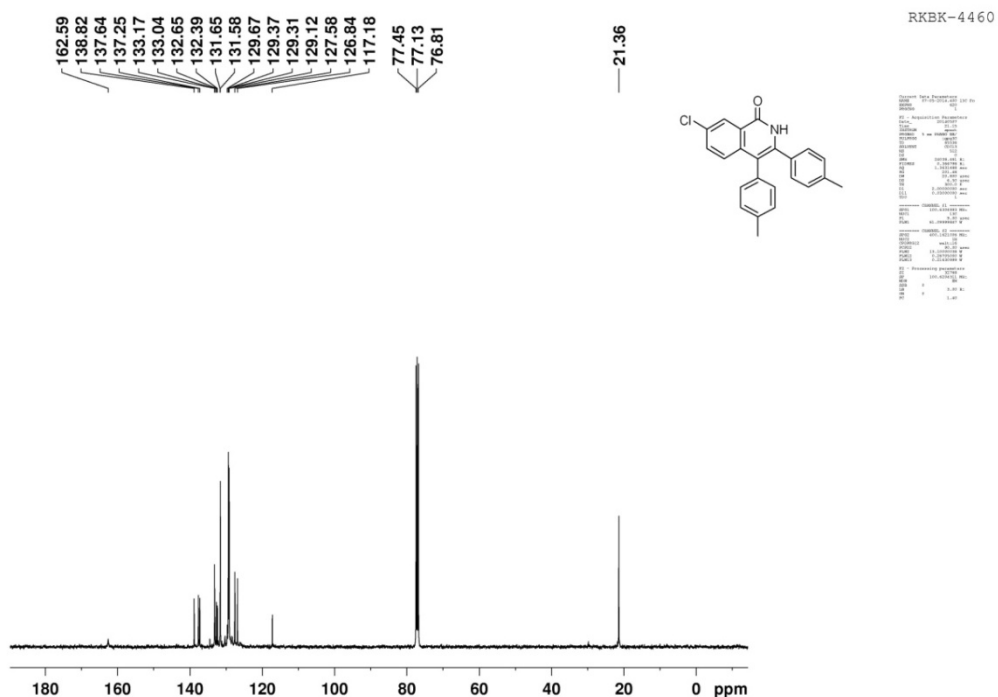

Fig. 58:  $^{13}\text{C}$  NMR of 4ib

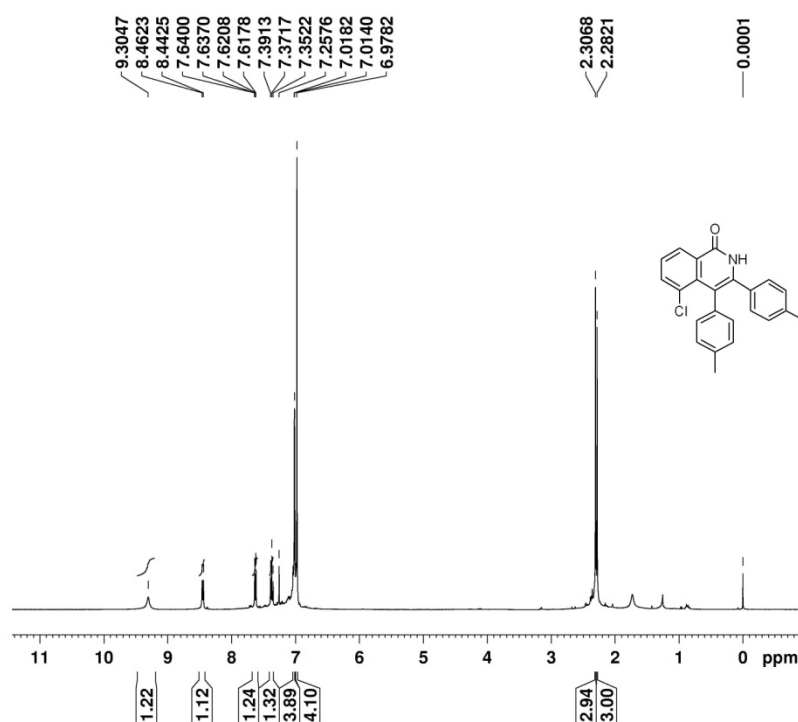

RKBK-446 B

```

Current Data Parameters
NAME 15-05-2014-400 13C AB
EXPNO 629
PROCNO 1
F2 - Acquisition Parameters
Date_ 20140514
Time 10.29
INSTRUM spect
PROBHD 5 mm PABBO BB/
PULPROG zgpg30
TD 65536
FIDRES 0.353
SOLVENT DMS
NS 128
DS 4
SWH 8121.362 Hz
FIDRES 0.141717 Hz
AQ 0.4078710 sec
RG 327.688
SQ 201.440
SN 201.850 uVsec
DE 6.50 uVsec
TE 298.2 K
D1 3.00000000 sec
D11 0.03000000 sec
D12 0.00000000 sec
===== CHANNEL f1 =====
NUC1 13C
P1 14.00000000 sec
===== CHANNEL f2 =====
NUC2 13C
P2 14.00000000 sec
F2 - Processing parameters
SI 32768
SF 100.6264993 MHz
WDW EM
SSB 0
GB 0
PC 1.40
  
```

Fig. 59: <sup>1</sup>H NMR of 4ib

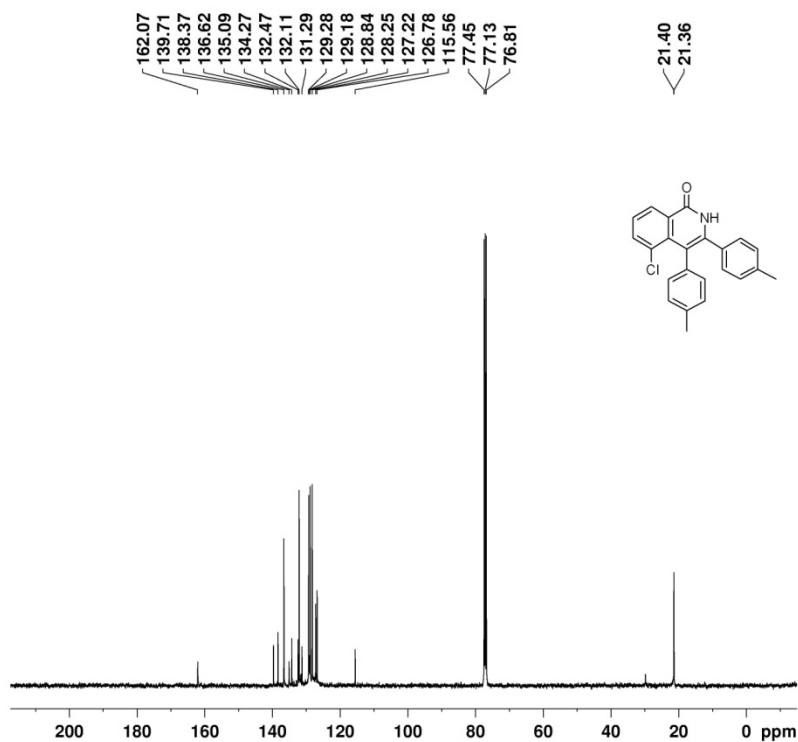

RKBK-446B

```

Current Data Parameters
NAME 15-05-2014-400 13C AB
EXPNO 629
PROCNO 1
F2 - Acquisition Parameters
Date_ 20140514
Time 10.29
INSTRUM spect
PROBHD 5 mm PABBO BB/
PULPROG zgpg30
TD 65536
FIDRES 0.353
SOLVENT DMS
NS 128
DS 4
SWH 8121.362 Hz
FIDRES 0.141717 Hz
AQ 0.4078710 sec
RG 327.688
SQ 201.440
SN 201.850 uVsec
DE 6.50 uVsec
TE 298.2 K
D1 3.00000000 sec
D11 0.03000000 sec
D12 0.00000000 sec
===== CHANNEL f1 =====
NUC1 13C
P1 14.00000000 sec
===== CHANNEL f2 =====
NUC2 13C
P2 14.00000000 sec
F2 - Processing parameters
SI 32768
SF 100.6264993 MHz
WDW EM
SSB 0
GB 0
PC 1.40
  
```

Fig. 60: <sup>13</sup>C NMR of 4ib

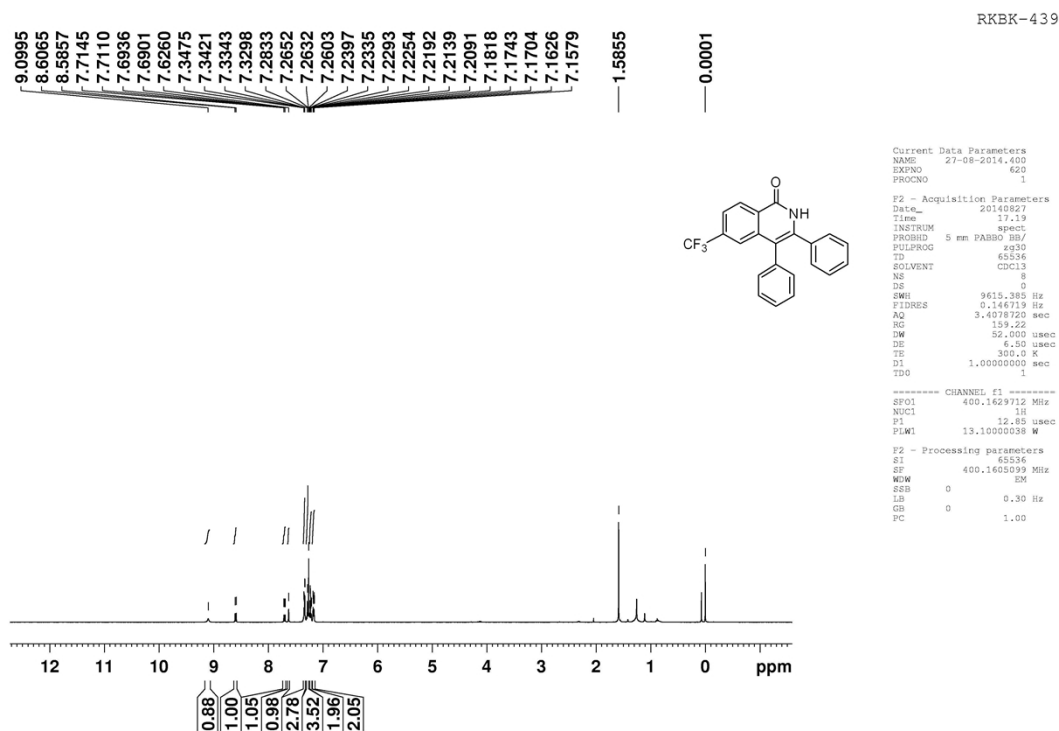

Fig. 61:  $^1\text{H}$  NMR of 4ja

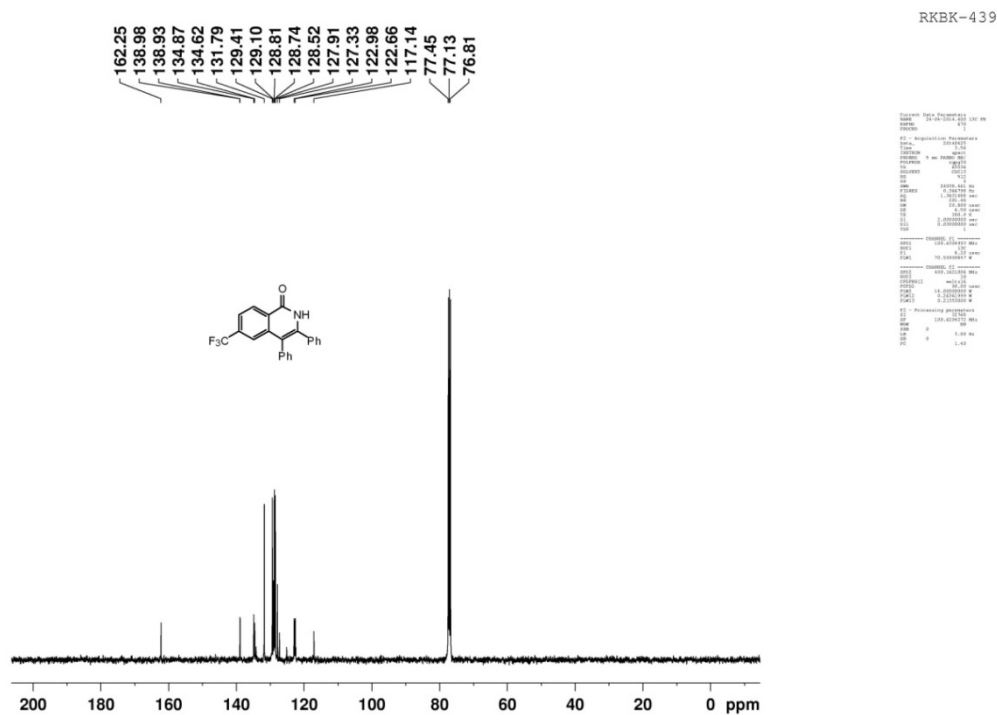

Fig. 62:  $^{13}\text{C}$  NMR of 4ja

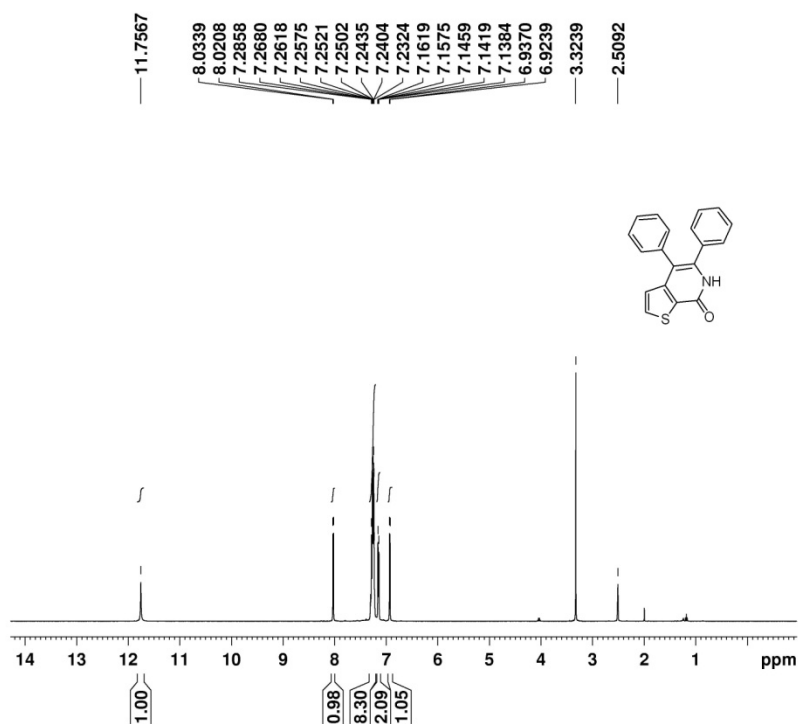

RKKB-443

Current Data Parameters  
 NAME 22-04-2014-400 AN  
 EXPNO 630  
 PROCNO 1

F2 - Acquisition Parameters  
 Date\_ 20140422  
 Time 20.50  
 INSTRUM spect  
 PROBU 5 mm PABBO BB  
 PULPROG zg30  
 TD 65536  
 SOLVENT DMSO  
 NS 8  
 DS 2  
 SWH 8012.820 Hz  
 FIDRES 0.122246 Hz  
 AQ 4.0894465 sec  
 RG 114.26  
 DW 62.400 usec  
 DE 6.50 usec  
 TE 300.0 K  
 D1 1.00000000 sec  
 TDO 1

===== CHANNEL f1 =====  
 SFO1 400.1429712 MHz  
 NUC1 1H  
 P1 12.35 usec  
 PL1 14.00000000 W

F2 - Processing parameters  
 SI 65536  
 SF 400.1405000 MHz  
 WDW EM  
 SSB 0  
 LB 0.30 Hz  
 GB 0  
 PC 1.00

Fig. 63: <sup>1</sup>H NMR of 4ka

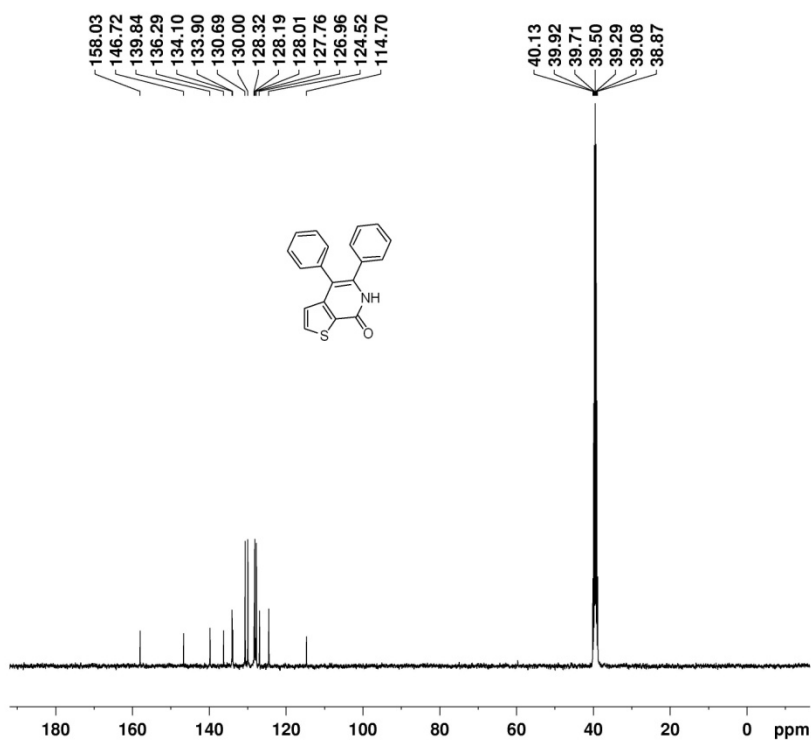

RKKB-443

Current Data Parameters  
 NAME 22-04-2014-400 AN  
 EXPNO 630  
 PROCNO 1

F2 - Acquisition Parameters  
 Date\_ 20140422  
 Time 20.50  
 INSTRUM spect  
 PROBU 5 mm PABBO BB  
 PULPROG zg30  
 TD 65536  
 SOLVENT DMSO  
 NS 8  
 DS 2  
 SWH 8012.820 Hz  
 FIDRES 0.122246 Hz  
 AQ 4.0894465 sec  
 RG 114.26  
 DW 62.400 usec  
 DE 6.50 usec  
 TE 300.0 K  
 D1 1.00000000 sec  
 TDO 1

===== CHANNEL f1 =====  
 SFO1 400.1429712 MHz  
 NUC1 1H  
 P1 12.35 usec  
 PL1 14.00000000 W

F2 - Processing parameters  
 SI 65536  
 SF 400.1405000 MHz  
 WDW EM  
 SSB 0  
 LB 0.30 Hz  
 GB 0  
 PC 1.00

Fig. 64: <sup>13</sup>C NMR of 4ka

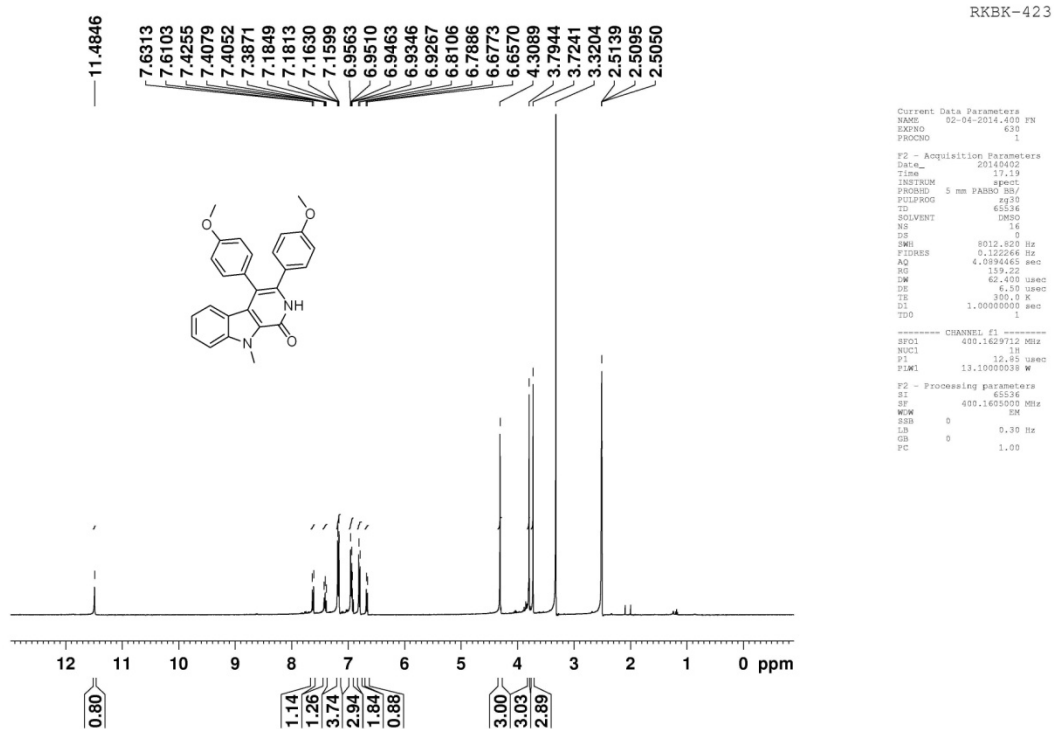

Fig. 65: <sup>1</sup>H NMR of 4lc

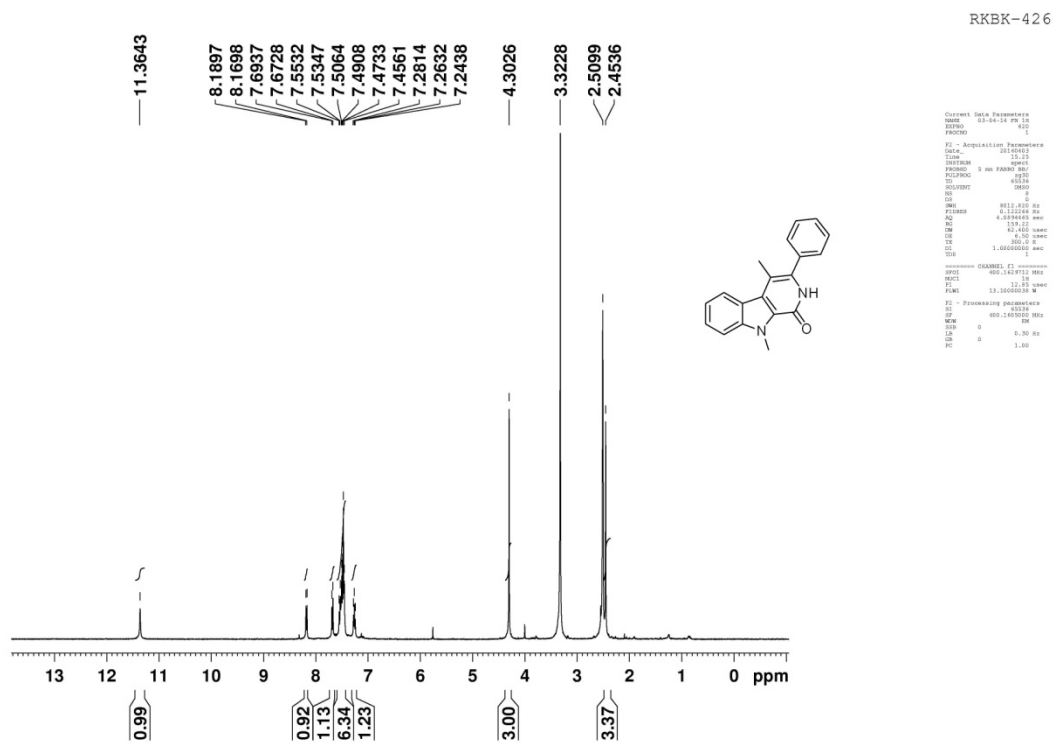

Fig. 66: <sup>1</sup>H NMR of 4lg

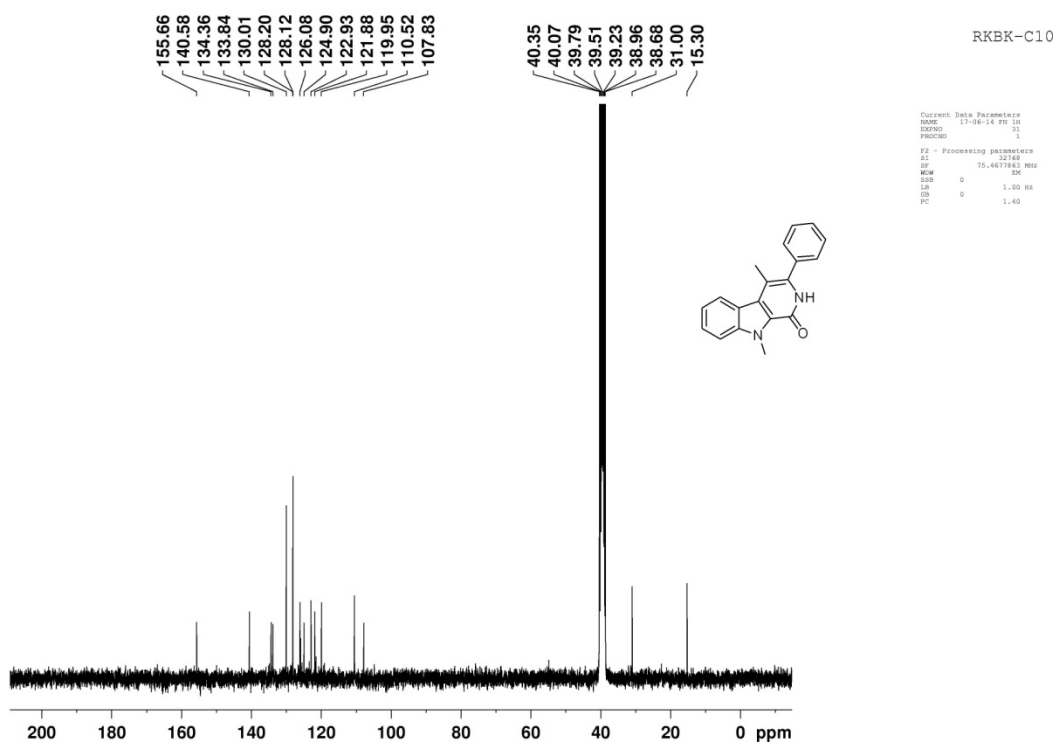

Fig. 67:  $^{13}\text{C}$  NMR of 4lg

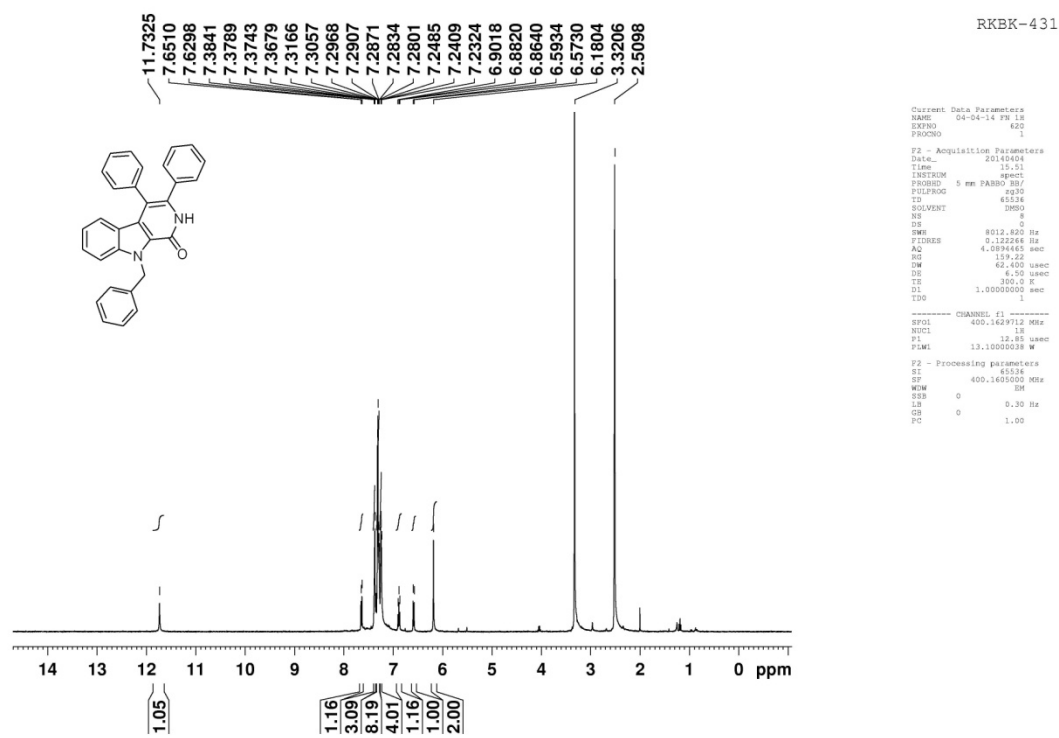

Fig. 68:  $^1\text{H}$  NMR of 4ma

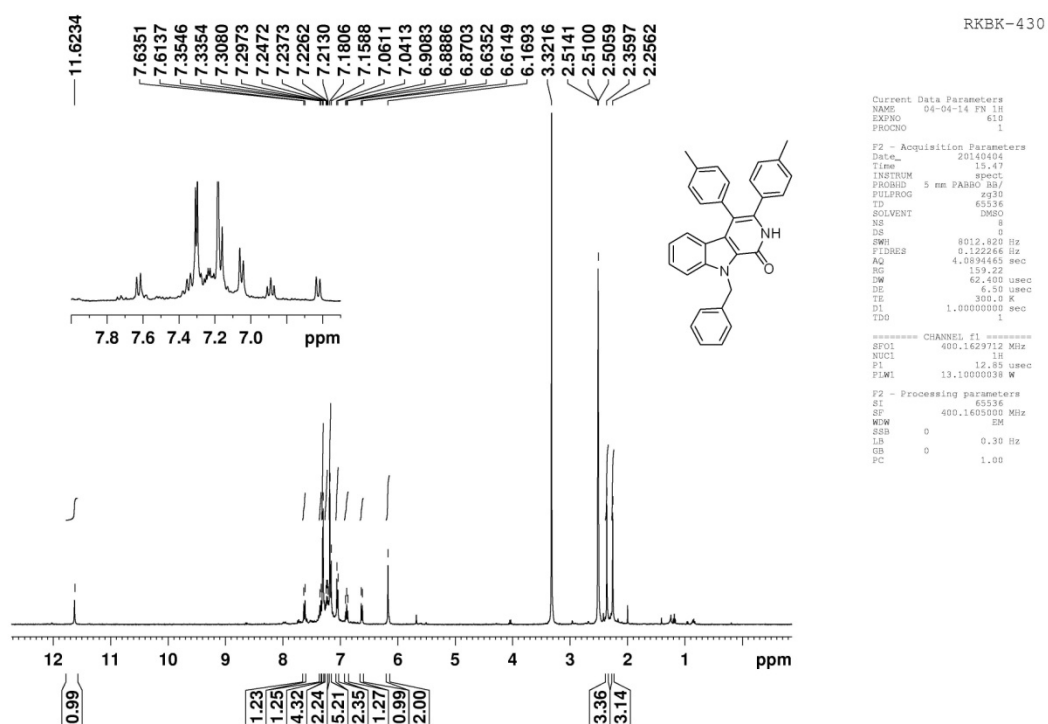

Fig. 69: <sup>1</sup>H NMR of 4mb

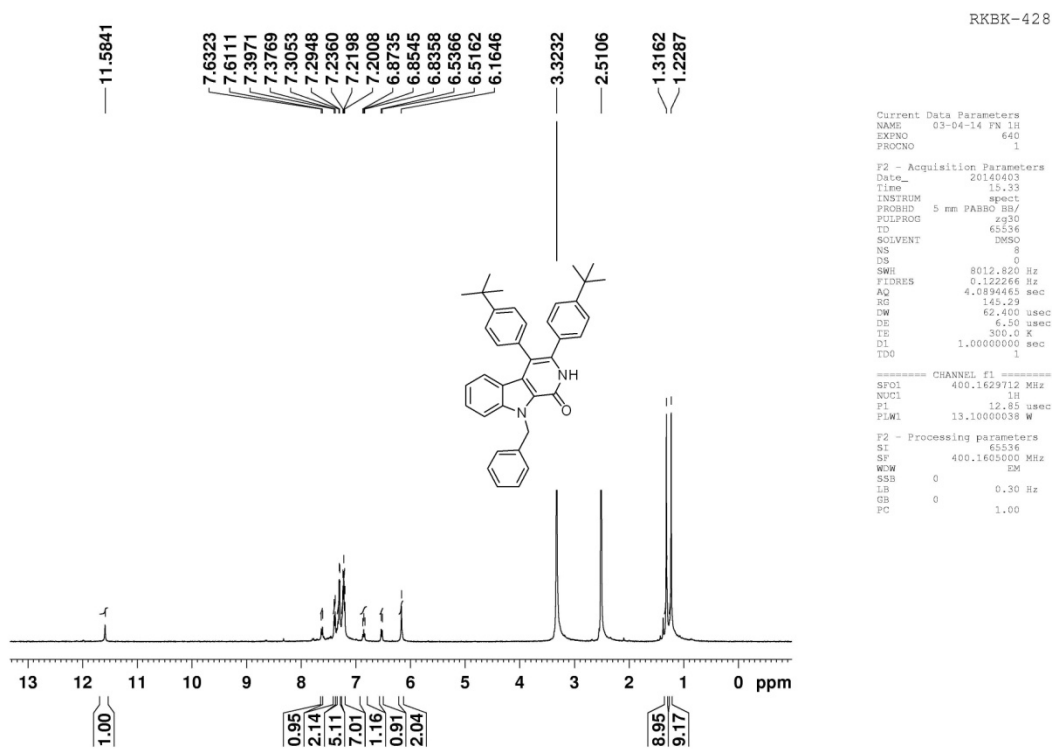

Fig. 70: <sup>1</sup>H NMR of 4md

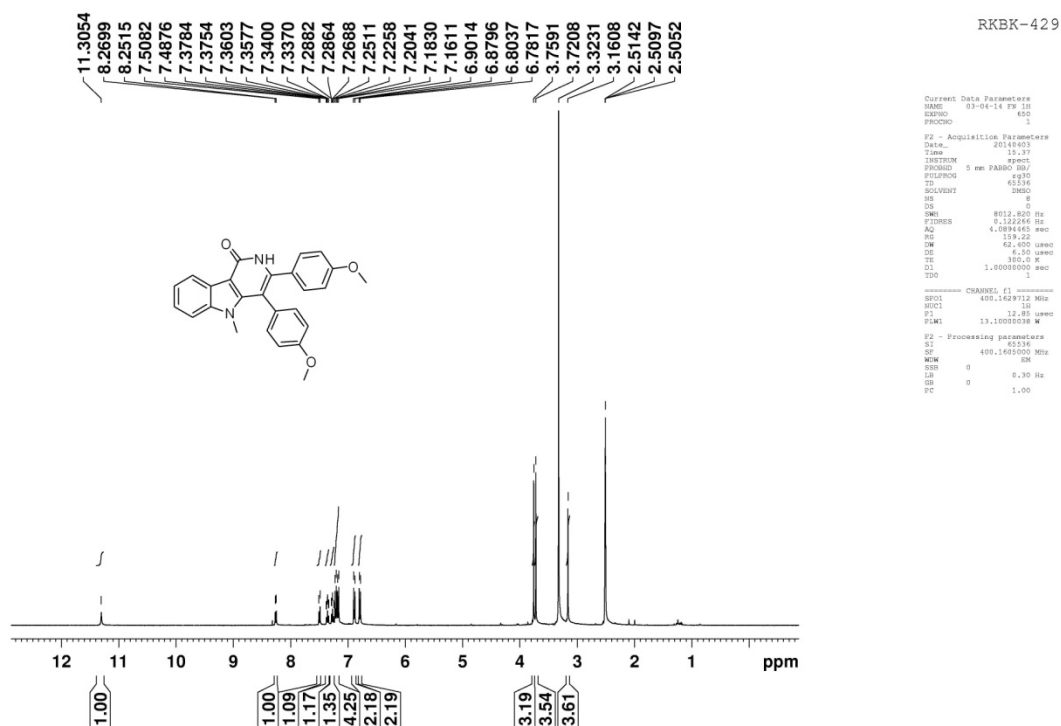

Fig. 71:  $^1\text{H}$  NMR of 4nc

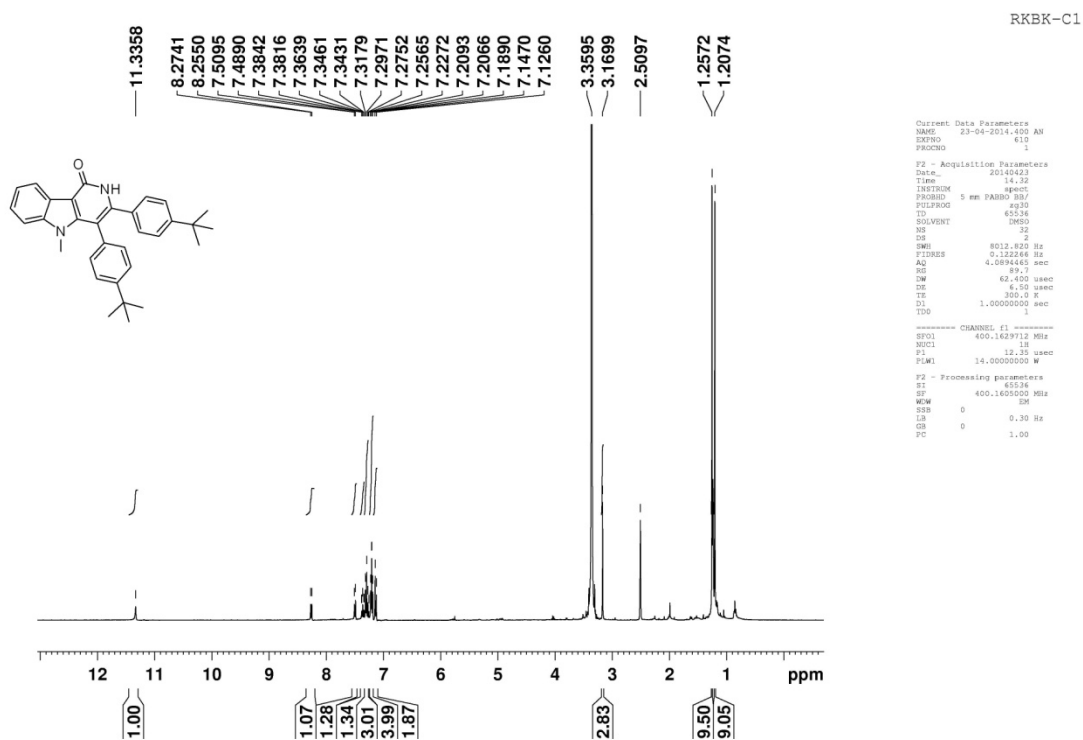

Fig. 72:  $^1\text{H}$  NMR of 4nd

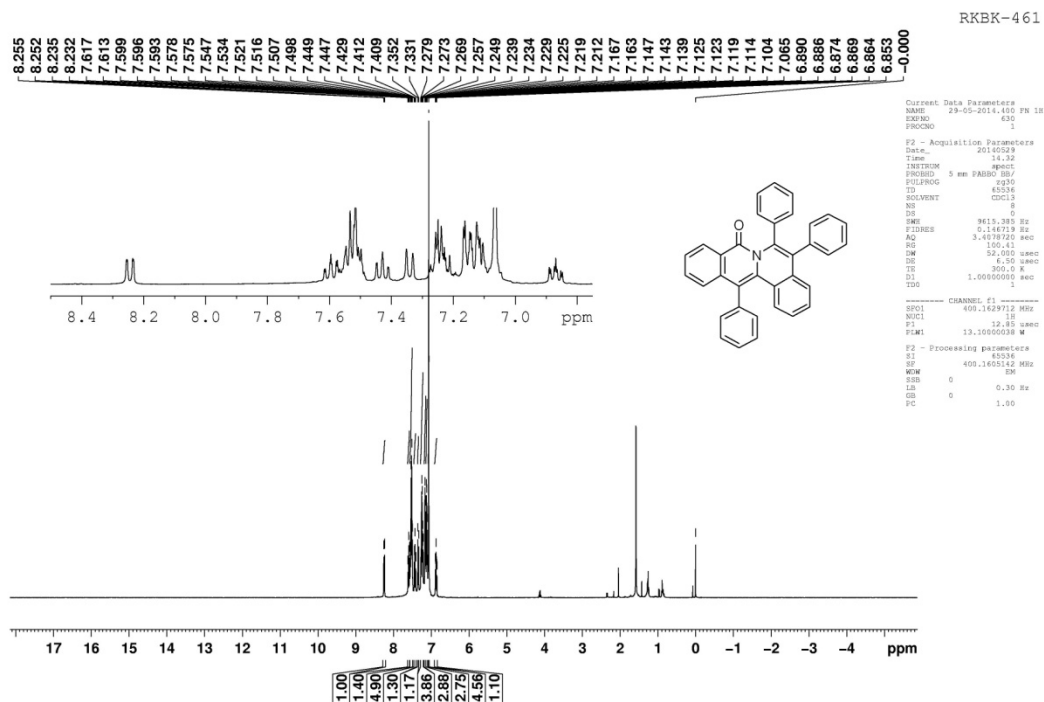

Fig. 73:  $^1\text{H}$  NMR of 6

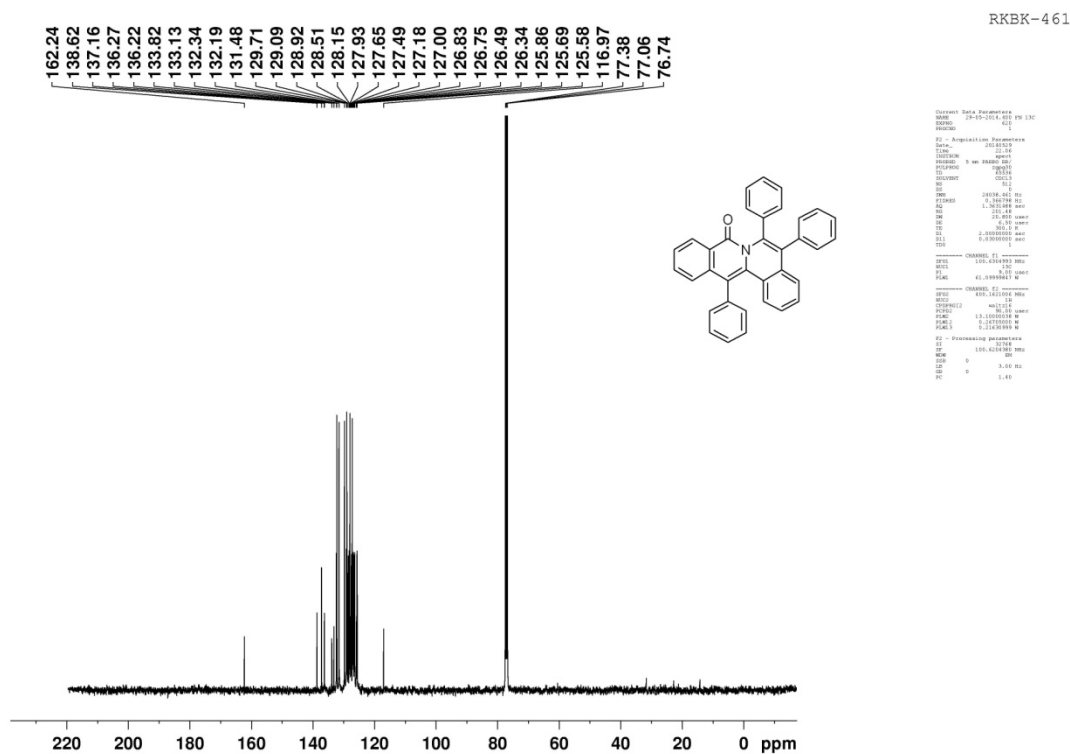

Fig. 74:  $^{13}\text{C}$  NMR of 6

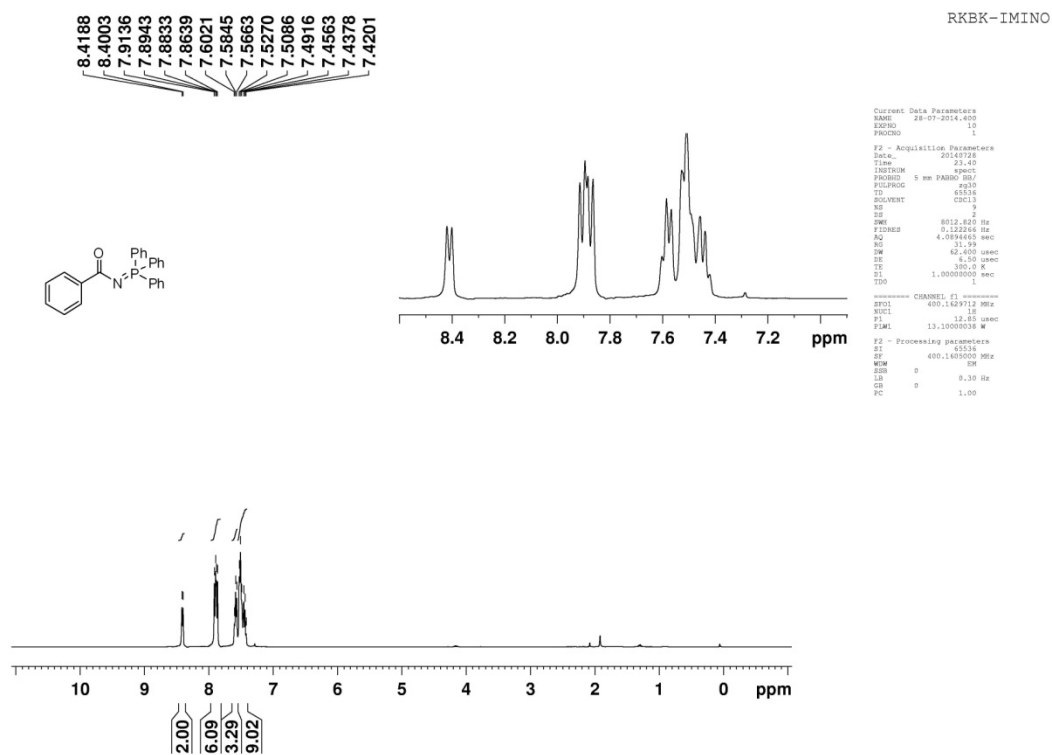

Fig. 75: <sup>1</sup>H NMR of 2a

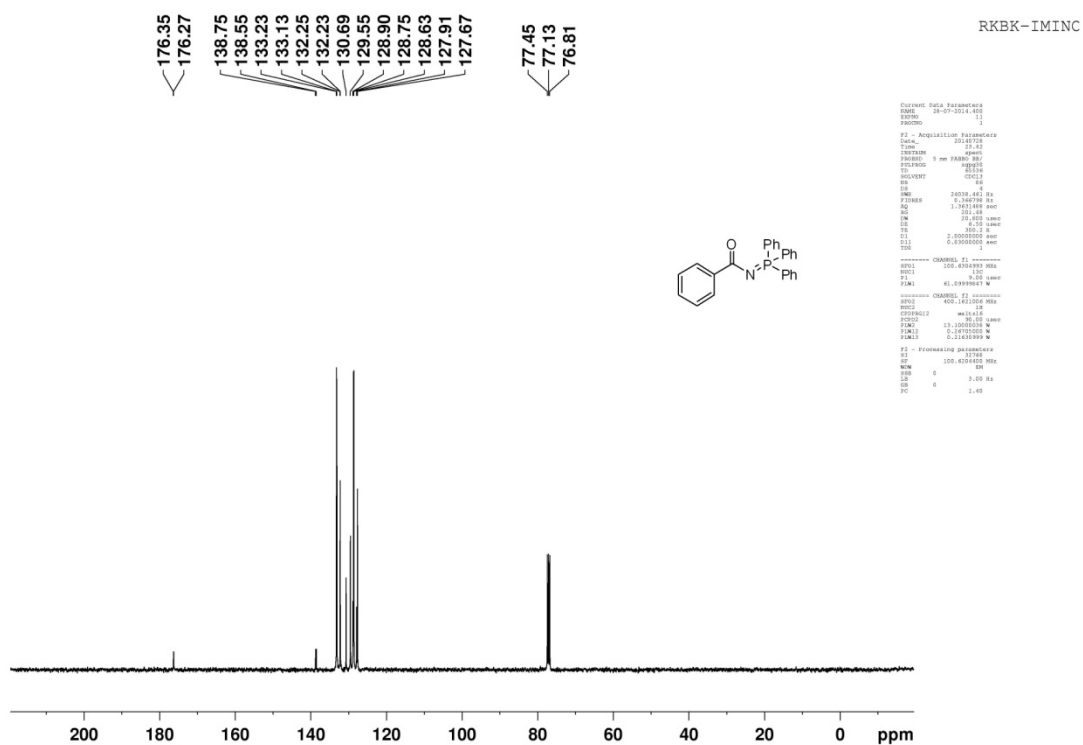

Fig. 76: <sup>13</sup>C NMR of 2a

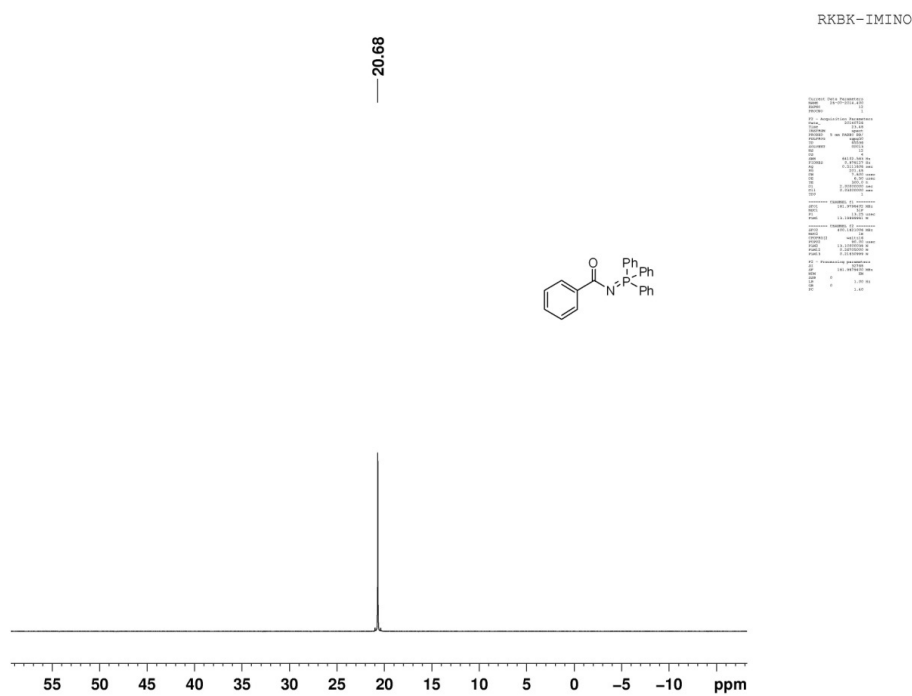

Fig. 77:  $^{31}\text{P}$  NMR of 2a

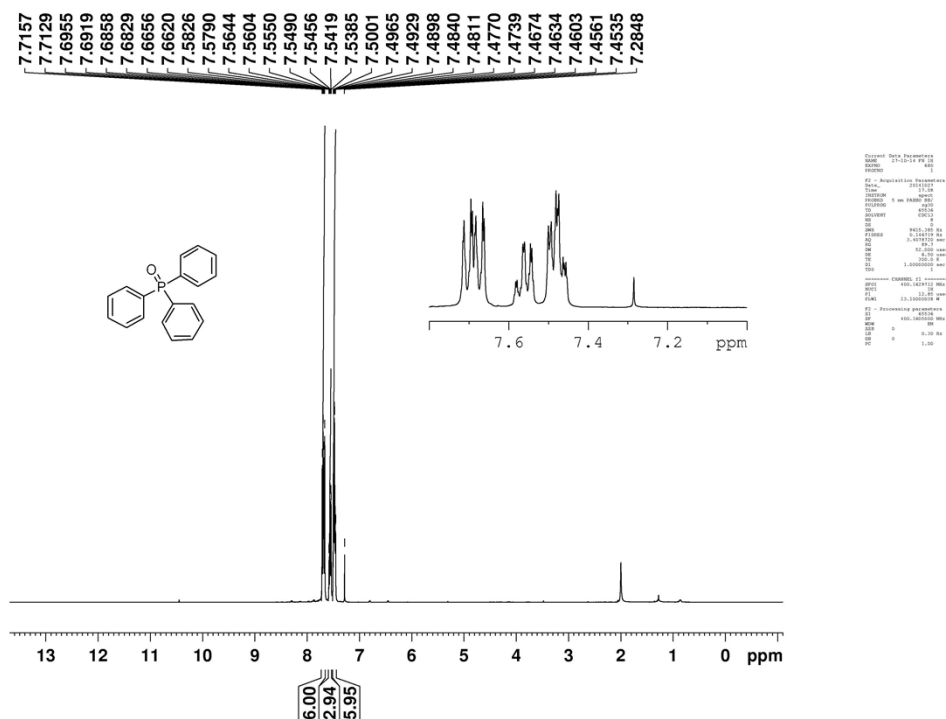

Fig. 78:  $^1\text{H}$  NMR of Triphenyl phosphine oxide

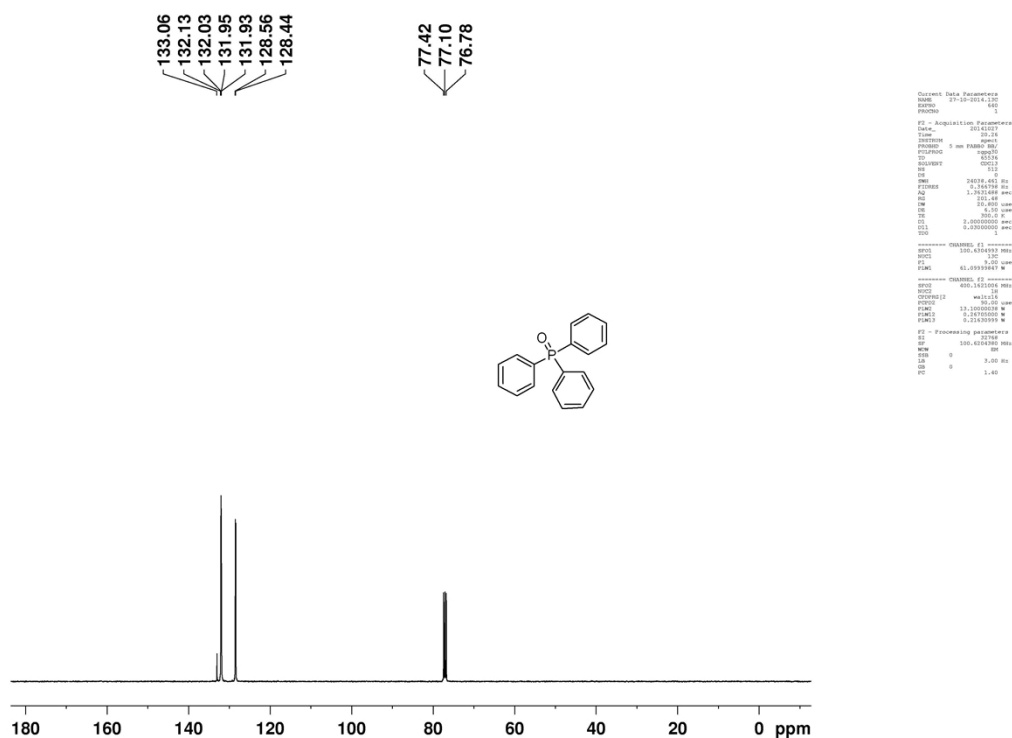

Fig. 79:  $^{13}\text{C}$  NMR of Triphenyl phosphine oxide

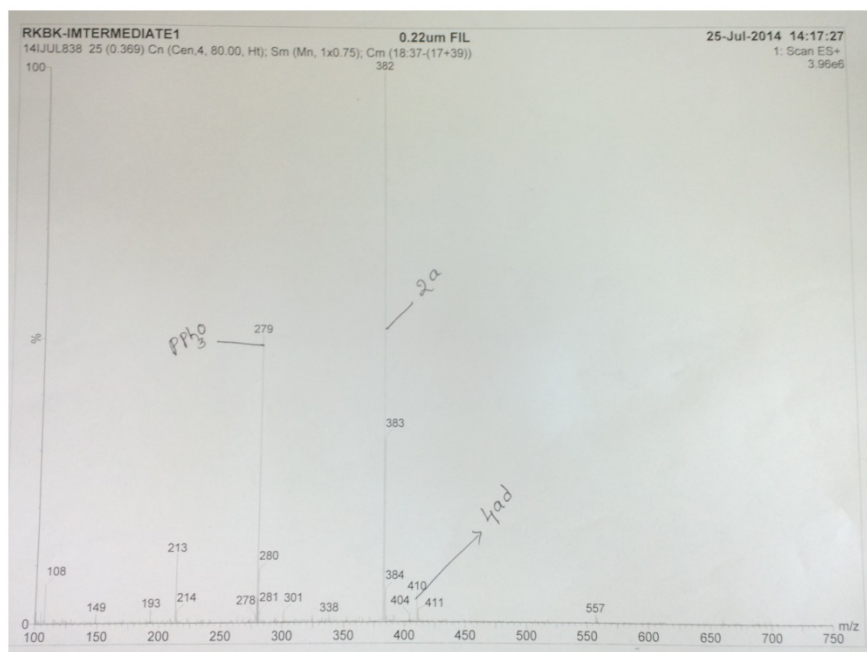

Figure 80: Mass spectrum of crude 2a and 4ad

### VIII. 2-D spectra of compounds 4bg, 4lg

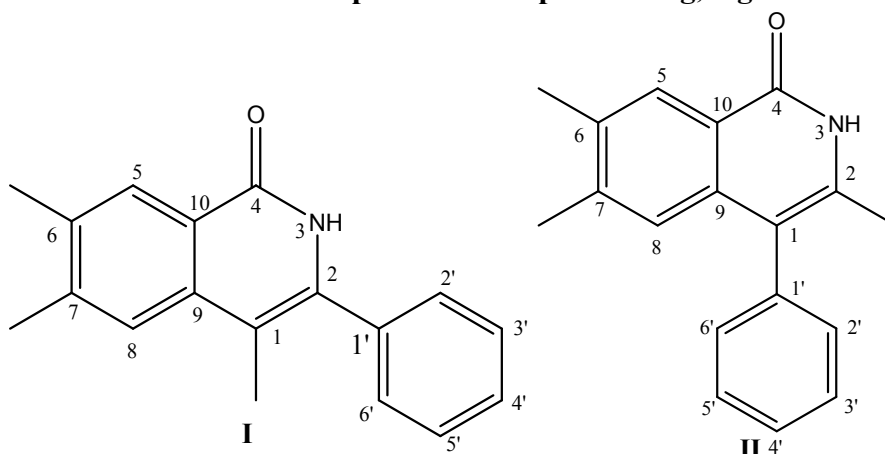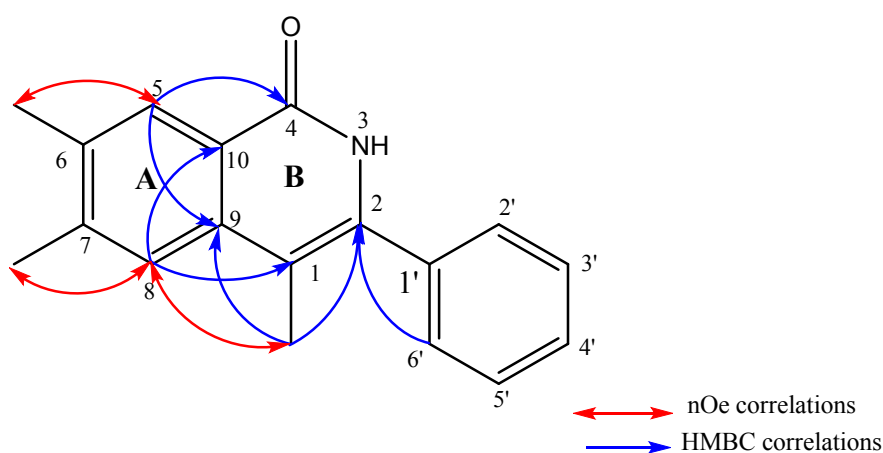

#### Important HMBC and nOe correlations of 4bg

The entire  $^1\text{H}$  and  $^{13}\text{C}$  NMR signal assignments and skeletal connectivity were established from a combination of various 1D and 2D NMR experiments. HMBC gave the information about the connectivity of atoms in the molecule while NOESY established the spatial correlations between proximate protons in the molecule. HMBC correlations of H-8 to C-1 and 1-CH<sub>3</sub> to C-9 indicated that CH<sub>3</sub> group is attached to C-1 in molecular structure I, whereas such HMBC correlations are not possible in molecular structure II. At the same time H-5 is giving HMBC correlation with quaternary carbon (C=O) C-4 and H-2',6' is also giving HMBC correlation with C-2, these correlations determined the connectivity of ring A to ring B and phenyl ring to ring B respectively. Important nOe correlation between 1-CH<sub>3</sub> and H-8 showed the proximity of both protons in the space and provided strong evidence for the attachment of CH<sub>3</sub> at C-1 atom.

#### $^1\text{H}$ and $^{13}\text{C}$ signal assignments of 4bg

| Carbon position     | <sup>13</sup> C Chemical shift (ppm) | <sup>1</sup> H Chemical shift (ppm) |
|---------------------|--------------------------------------|-------------------------------------|
| C-1                 | 106.1                                | -                                   |
| C-1-CH <sub>3</sub> | 14.0                                 | 2.24 (s)                            |
| C-2                 | 134.9                                | -                                   |
| N-H-3               | -                                    | 8.74 (s)                            |
| C-4                 | 161.6                                | -                                   |
| C-5                 | 128.1                                | 8.20 (s)                            |
| C-6                 | 136.1                                | -                                   |
| C-6-CH <sub>3</sub> | 19.8                                 | 2.42 (s)                            |
| C-7                 | 142.8                                | -                                   |
| C-7-CH <sub>3</sub> | 20.8                                 | 2.45 (s)                            |
| C-8                 | 124.5                                | 7.51 (s)                            |
| C-9                 | 136.8                                | -                                   |
| C-10                | 135.5                                | -                                   |
| C-1'                | 136.4                                | -                                   |
| C-2',C-6'           | 128.9                                | 7.47 (m)                            |
| C-3',C-5'           | 129.4                                | 7.45 (m)                            |
| C-4'                | 129.1                                | 7.46 (m)                            |

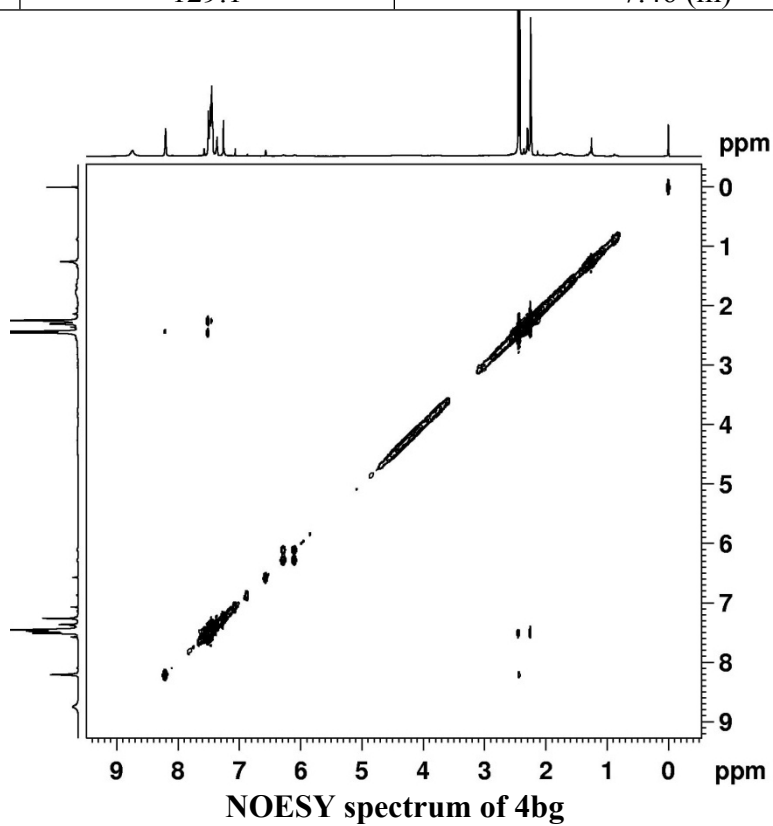

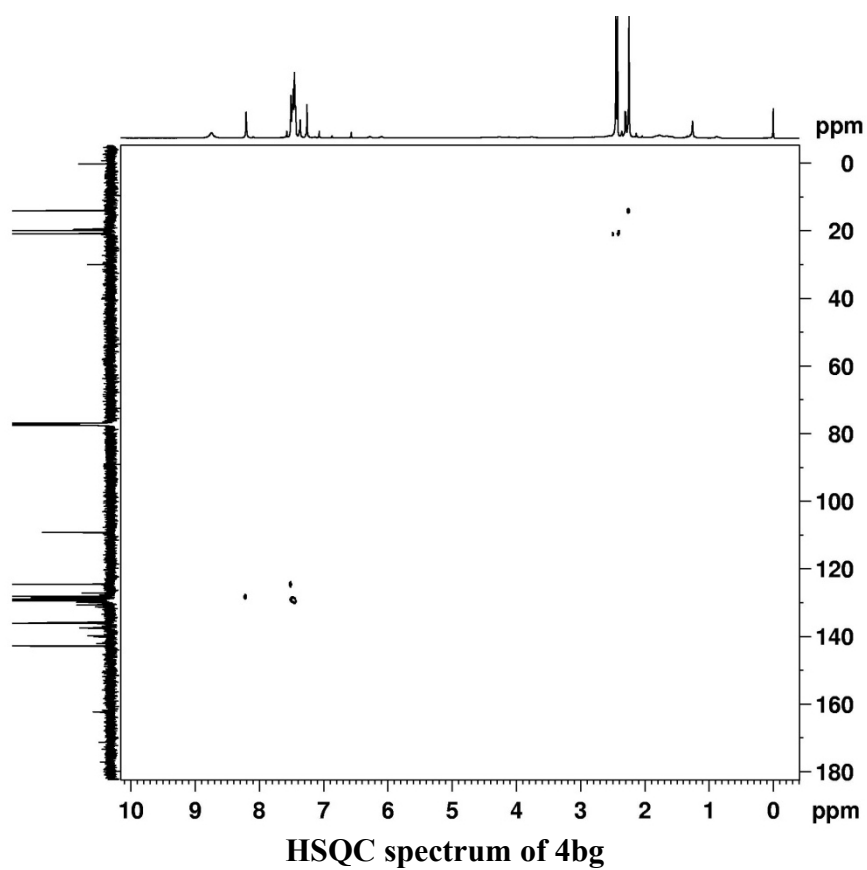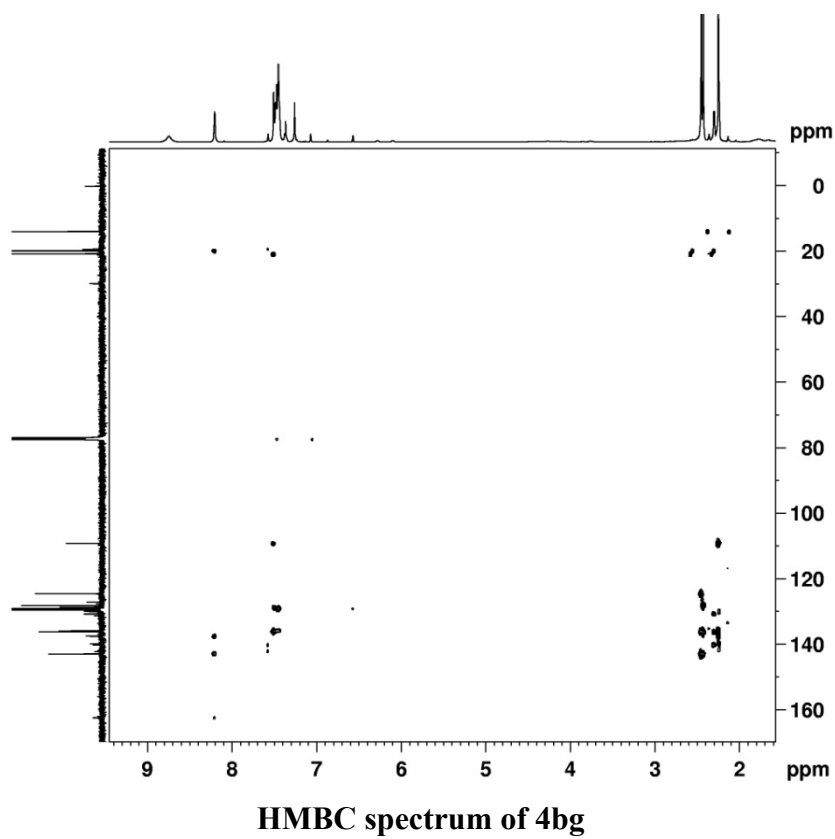

Compound-4lg

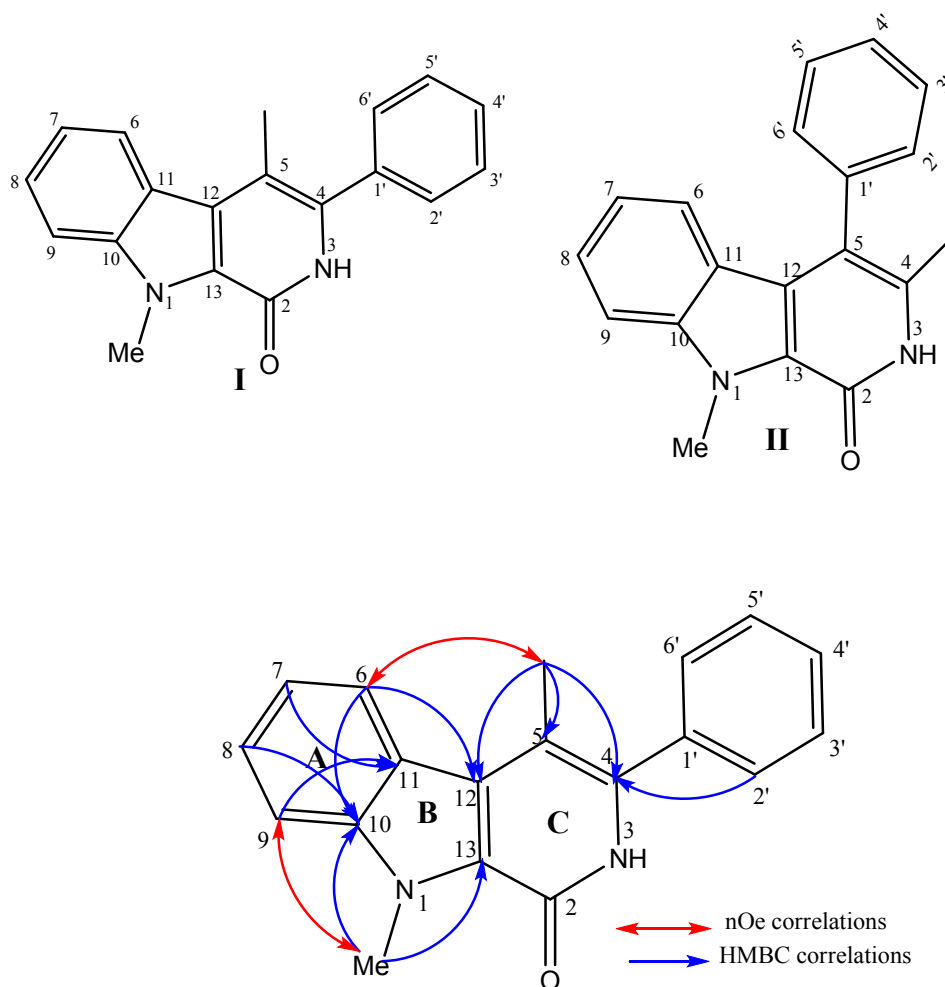

### Important HMBC and nOe correlations of 4lg

COSY experiment established the two spin systems H-6 to H-9 in ring C and phenyl ring. HMBC correlations of H-6 and 5-CH<sub>3</sub> to C-12 and 5-CH<sub>3</sub>, H-2', H-6' to C-4 clearly indicated that CH<sub>3</sub> group is attached to C-5 of ring C and phenyl ring to C-4 atoms respectively in molecular structure I, which is not possible in molecular structure II. At the same time H-6 and H-8 giving HMBC correlation to quaternary carbon C-10 and H-7 and H-9 is giving HMBC correlation with quaternary carbon C-11, and fixed the positions of quaternary carbons. Important nOe correlation between 5-CH<sub>3</sub> and H-6 showed the proximity of both protons in the space and played an important role to establish the attachment of methyl group at C-5 atom in structure I, such nOe correlation would be absent in structure II.

| Carbon position   | <sup>13</sup> C Chemical shift (ppm) | <sup>1</sup> H Chemical shift (ppm) |
|-------------------|--------------------------------------|-------------------------------------|
| N-CH <sub>3</sub> | 31.5                                 | 4.30 (s)                            |
| C-2               | 155.6                                | -                                   |
| N-H-3             | -                                    | 11.34 (s)                           |
| C-4               | 133.9                                | -                                   |
| C-5               | 107.9                                | -                                   |

|                     |       |                         |
|---------------------|-------|-------------------------|
| C-5-CH <sub>3</sub> | 15.6  | 2.44 (s)                |
| C-6                 | 122.9 | 8.18 (d, $J = 8.10$ Hz) |
| C-7                 | 120.4 | 7.26 (t, $J = 7.60$ Hz) |
| C-8                 | 126.7 | 7.53 (t, $J = 7.60$ Hz) |
| C-9                 | 110.0 | 7.68 (d, $J = 8.10$ Hz) |
| C-10                | 140.6 | -                       |
| C-11                | 122.0 | -                       |
| C-12                | 126.0 | -                       |
| C-13                | 125.8 | -                       |
| C-1'                | 134.2 | -                       |
| C-2',C-6'           | 129.9 | 7.49 (m)                |
| C-3',C-5'           | 128.6 | 7.46 (m)                |
| C-4'                | 128.3 | 7.45 (m)                |

<sup>1</sup>H and <sup>13</sup>C signal assignments of 4lg

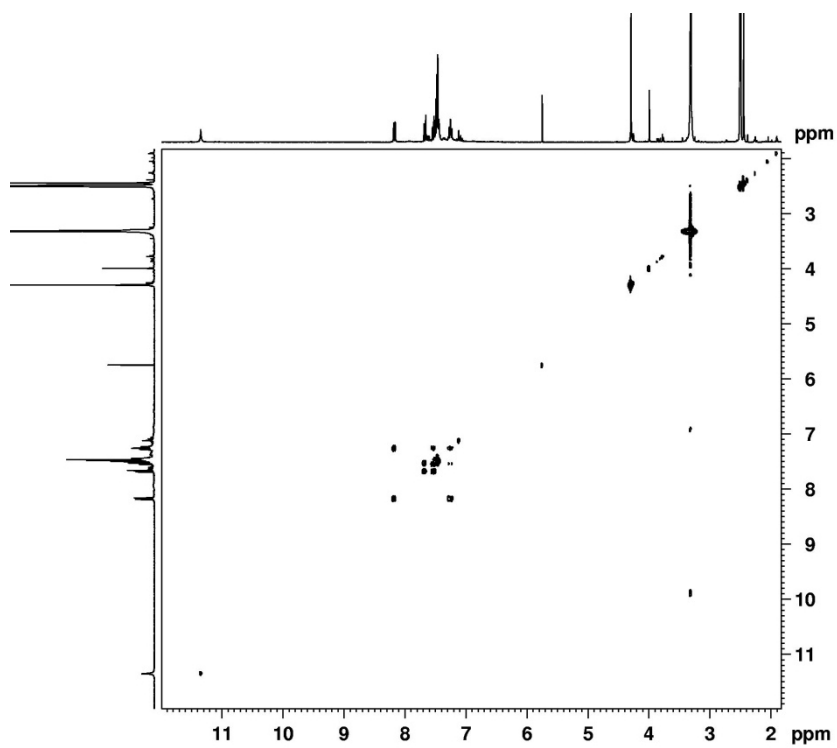

COSY spectrum of 4lg

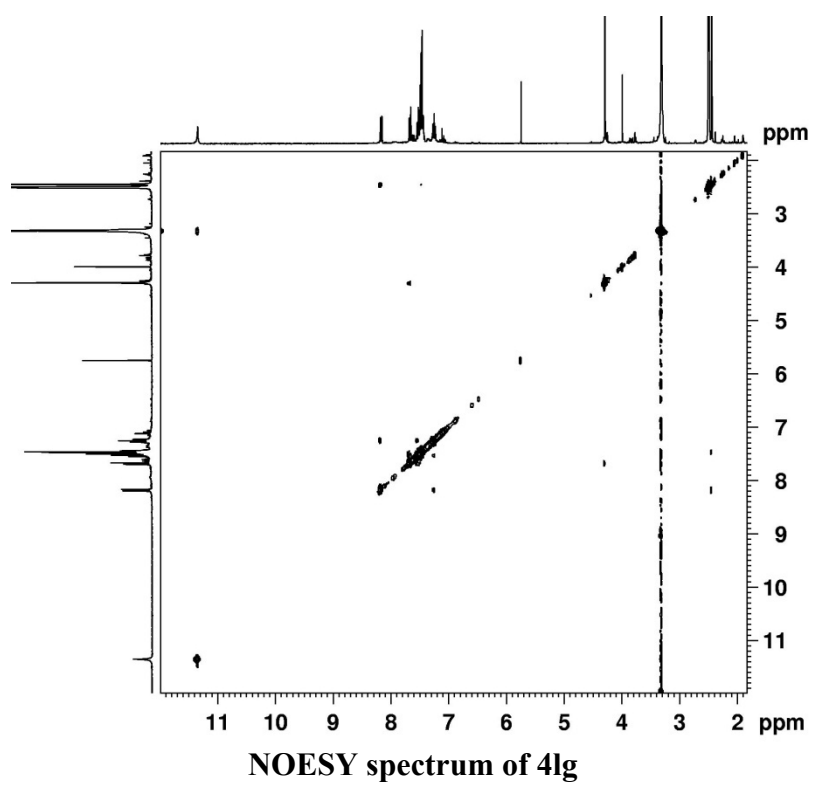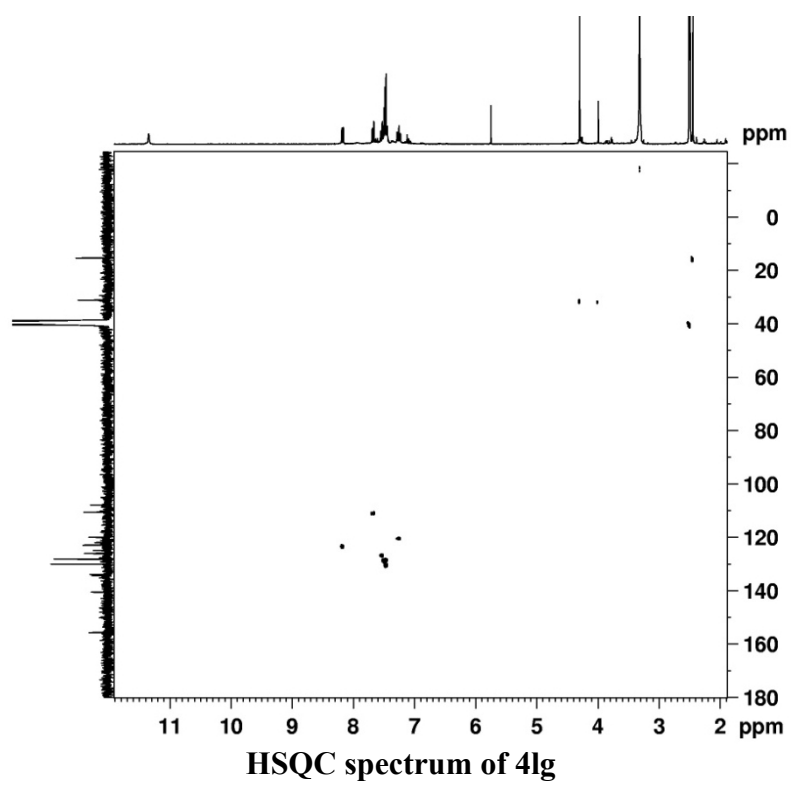

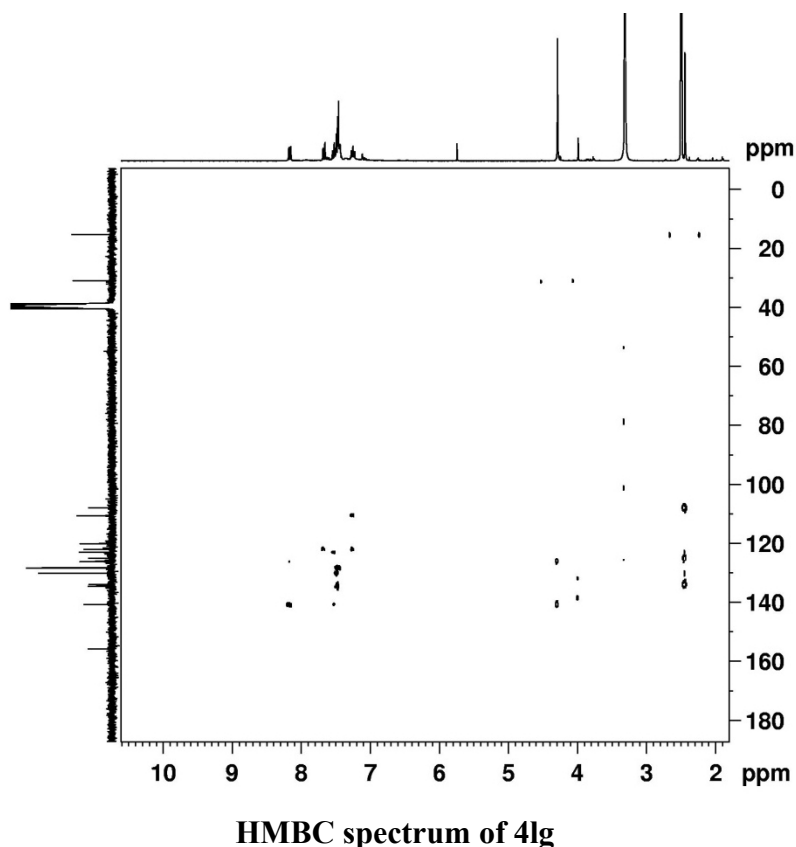

<sup>1</sup> (a) N. Guimond, C. Gouliaras and K. Fagnou, *J. Am. Chem. Soc.* 2010, **132**, 6908; (b) S. Mochida, N. Umeda, K. Hirano, T. Satoh and M. Miura, *Chem. Lett.* 2010, **39**, 744; (c) G. Song, D. Chen, C.-L. Pan, R. H. Crabtree and X. Li, *J. Org. Chem.* 2010, **75**, 7487.

<sup>2</sup> Reddy, M. C.; Manikandan, R.; Jeganmohan, M. *Chem. Commun.* **2013**, 49, 6060

<sup>3</sup> (a) K. Shin, J. Ryu and S. Chang, *Org. Lett.* **2014**, 16, 2022. (b) J. Ryu, J. Kwak, K. Shin, D. Lee, and S. Chang, *J. Am. Chem. Soc.* 2013, **135**, 12861.

<sup>4</sup> J. Liu, S. Mandel, C. M. Hadad and M. S. Platz, *J. Org. Chem.* 2004, **69**, 8583

<sup>5</sup> H. Morita, A. Tatami, T. Maeda, B. J. Kim, W. Kawashima, T. Yoshimura, H. Abe and T. Akasaka, *J. Org. Chem.* 2008, **73**, 7159.

<sup>6</sup> B. Pal, P. Jaisankar and V. S. Giri, *Synthetic Commun.* 2004, **34**, 1317, and the references cited therein.

<sup>7</sup> (a) N. Guimond, S. I. Gorelsky and K. Fagnou, *J. Am. Chem. Soc.* 2011, **133**, 6449. (b) B. Li, H. Feng, S. Xu and Wang, B. *Chem. Eur. J.* 2011, **17**, 12573.

<sup>8</sup> F. Wang, H. Liu, H. Fu, Y. Jiang and Y. Zhao, *Org. Lett.* 2009, **11**, 2469.

<sup>9</sup> S. Mochida, N. Umeda, K. Hirano, T. Satoh and Miura, M. *Chem. Lett.* 2010, **39**, 744.
